# 1 **β-lactam Antibiotics Stimulate the Pathogenicity of** 2 **Methicillin-resistant *Staphylococcus aureus* Via** 3 **SarA-controlled Tandem Lipoprotein Expression**

4  
5 Weilong Shang<sup>1¶</sup>, Yifan Rao<sup>2¶</sup>, Ying Zheng<sup>1¶</sup>, Yi Yang<sup>1</sup>, Qiwen Hu<sup>1</sup>, Zhen Hu<sup>1</sup>,  
6 Jizhen Yuan<sup>1</sup>, Huagang Peng<sup>1</sup>, Kun Xiong<sup>1</sup>, Li Tan<sup>1</sup>, Shu Li<sup>1</sup>, Junmin Zhu<sup>1</sup>, Ming Li<sup>1</sup>,  
7 Xiaomei Hu<sup>1</sup>, Xuhu Mao<sup>2,3\*</sup>, Xiancai Rao<sup>1\*</sup>

8  
9 <sup>1</sup> Department of Microbiology, College of Basic Medical Sciences, Army Medical  
10 University (Third Military Medical University), Chongqing, 400038, China,

11 <sup>2</sup> Institute of Modern Biopharmaceuticals, School of Life Sciences, Southwest  
12 University, Chongqing, 400715, China,

13 <sup>3</sup> Department of Clinical Microbiology and Immunology, College of Medical  
14 Laboratory Science, Army Medical University (Third Military Medical University),  
15 Chongqing, 400038, China.

16 <sup>¶</sup>These authors contributed equally to this work.

17  
18 \* Corresponding author

19 E-mail: X. Rao: raoxiancai@126.com, or X. Mao: mxh95xy@tom.com.

20  
21  
22 Running title: β-lactams stimulate MRSA pathogenicity

## Abstract

Methicillin-resistant *Staphylococcus aureus* (MRSA) is a leading cause of nosocomial infections worldwide. MRSA resists nearly all  $\beta$ -lactam antibiotics that have a bactericidal activity and a signal inducer effect. However, studies have yet to clarify whether the inducer effect of empirically used  $\beta$ -lactams stimulates MRSA pathogenicity in vivo. Here, we showed that a new cluster of tandem lipoprotein genes (*tlpps*) was upregulated in MRSA in response to the subinhibitory concentrations of  $\beta$ -lactam induction. The increased Tlpps significantly altered immune responses by macrophages with high IL-6 and TNF $\alpha$  levels. The deletion of the *tlpps* mutant (N315 $\Delta$ *tlpps*) significantly decreased the proinflammatory cytokine levels in vitro and in vivo. The bacterial loads of N315 $\Delta$ *tlpps* in the mouse kidney were also reduced compared with those of the wild type N315. The  $\beta$ -lactam-treated MRSA exacerbated cutaneous infections with increased lesion size, extended illness, and flake-like abscess-formation compared with those of the nontreatment. The  $\beta$ -lactam antibiotics that promoted the MRSA pathogenicity were SarA dependent, and the increasing expression of *tlpps* after  $\beta$ -lactam treatment was directly controlled by the global regulator SarA. Overall, our findings suggested that  $\beta$ -lactams should be used carefully because it might lead to a worse outcome of MRSA infection than inaction in the treatment.

**Key words:** Methicillin-resistant *Staphylococcus aureus*,  $\beta$ -lactam antibiotics, tandem lipoproteins, SarA, pathogenicity

## Author summary

$\beta$ -lactams are widely used in practice to treat infectious diseases, however,  $\beta$ -lactams worsening the outcome of a certain disease is poorly understood. In this study, we have identified a new cluster of tandem lipoprotein genes (*tlpps*) that is upregulated in the major clinically prevalent MRSA clones in response to the subinhibitory concentrations of  $\beta$ -lactams induction. The major highlight in this work is that

$\beta$ -lactams induce SarA expression, and then SarA directly binds to the *tlpp* cluster promoter region and upregulates the *tlpp* expression in MRSA. Moreover, the  $\beta$ -lactam stimulated Tlpps are important virulence factors that enhance MRSA pathogenicity. The deletion of the *tlpps* mutant significantly decreases the proinflammatory cytokine levels in vitro and in vivo. The  $\beta$ -lactam induced Tlpps enhance the host inflammatory responses by triggering the expression of IL-6 and TNF $\alpha$ , thereby promoting bacterial colonization and abscess formation. These data elucidate that  $\beta$ -lactams can worsen the outcome of MRSA infection through the induction of *tlpps* that are controlled by the global regulator SarA.

## Introduction

Infectious diseases caused by bacteria are common and adversely affect human health worldwide. The discovery of antibiotics for antibacterial application was a remarkable achievement in the 20th century. In the therapeutic use of antibiotics in humans and animals, bacteria encounter wide gradients of antibiotic concentrations in host bodies [1]. Antibiotics can serve as signal inducers, in addition to their clinically important antibacterial activity, and influence the physiological characteristics of bacteria and trigger various cellular responses in bacterial species. Low levels of antibiotics can induce extracellular DNA release, virulence factor production, and biofilm formation [2,3], resulting in a worse outcome of bacterial infections. Therefore, the mechanisms underlying the stimulation of pathogenicity in a bacterial population at subinhibitory antibiotic concentrations should be understood.

Methicillin-resistant *Staphylococcus aureus* (MRSA) is a leading pathogen with notable pathogenic effects. MRSA causes a wide range of diseases, including acute skin and soft tissue infections, chronic and persistent endocarditis, osteomyelitis, and pneumonia [4,5]. MRSA infections cause greater morbidity and mortality than methicillin-susceptible *S. aureus* (MSSA) infections do [6,7]. However, the underlying mechanisms of these effects remain unclear. Several studies have suggested that as-yet-unidentified virulence factors or inappropriate treatments

contribute to the poor outcome of MRSA infections [6,8,9]. It has been reported that between 30% and 80% of individuals infected with MRSA are inappropriately treated often with  $\beta$ -lactam antibiotics because of the failure to recognize MRSA infection initially [10,11]. Accumulated data have demonstrated that the subinhibitory concentrations of  $\beta$ -lactam antibiotics can promote *S. aureus* pathogenicity by increasing the expression of alpha-toxin [12], Panton–Valentine leukocidin (PVL) [2], enterotoxins [13], or staphylococcal protein A (SPA) in vitro [14]. Nevertheless, the contribution of the certain altered virulence factor to the MRSA pathogenesis in vivo has yet determined, and the molecular mechanisms underlying  $\beta$ -lactams modulating MRSA pathogenesis remain largely unknown.

Lipoproteins (Lpps) are an abundant family of proteins anchored in the bacterial membrane, and they account for at least 2% of a bacterial proteome [15,16]. *S. aureus* encodes 55–70 putative Lpps, and approximately 50% of these Lpps are annotated as chaperones or as transporters for amino acids, peptides, iron, and zinc [17]. Many of the proposed Lpps (more than 30%) in *S. aureus* are conserved hypothetical proteins of unknown functions [16]. Most virulent MRSA strains, such as USA300, carry a conserved genomic island termed vSa $\alpha$  (nonphage and nonstaphylococcal cassette chromosome genomic island) that encodes numerous homologous *lpps* arranged in tandem, which is referred to as “tandem lipoproteins” (*tlpps*) or “lipoprotein-like” (*lpl*) [15,18]. This *tlpp* cluster likely represents the paralogous genes that have diverged after a duplication event in *S. aureus* [17]. MRSA USA300 belonging to the clonal complex CC8 carries 15 (22%) hypothetical Tlpps. Of these Tlpps, 9 are specific to the vSa $\alpha$  genomic island [15]. By comparison, N315 belonging to the clonal complex CC5 carries 12 (21%) hypothetical Tlpps. Of these Tlpps, 9 Lpl proteins are specific to the vSa $\alpha$  genomic island (S1 Table).

Some staphylococcal Lpps can trigger host cell invasion, increase bacterial pathogenicity, and contribute to the epidemic of CC8 and CC5 strains [19,20]. However, the exact roles of the Tlpp proteins are unclear. Whether these Tlpp proteins can be induced by the subinhibitory concentrations of antibiotics and contribute to the pathogenesis of MRSA have yet to be determined. In this study, we

demonstrated that a new *tlpp* cluster of MRSA was upregulated in response to the subinhibitory concentrations of  $\beta$ -lactam induction. The increased Tlpps in MRSA significantly altered immune responses by increasing the IL-6 and TNF $\alpha$  levels of the macrophages. Null Tlpp MRSA mutant infection decreased the IL-6 and TNF $\alpha$  levels in serum and the bacterial burdens in kidney of a mouse model.  $\beta$ -lactam-treated MRSA N315 exhibited an increased pathogenicity with severe cutaneous infection and abscess formation. Moreover, the  $\beta$ -lactam antibiotics that promoted pathogenicity in MRSA were SarA dependent, and the increasing Tlpp expression after  $\beta$ -lactam treatment was directly controlled by the global regulator SarA.

## Results

### $\beta$ -lactam antibiotics stimulated tandem lipoprotein expression in MRSA.

It is reported that the subinhibitory concentrations of  $\beta$ -lactam antibiotics can induce the production of some *S. aureus* toxins, such as alpha-toxin [12], PVL [2], and enterotoxins [13], or immune evasion molecules, such as SPA [14]. Here, *S. aureus* N315, which is a globally prevalent sequence type 5 (ST5) MRSA strain [21], was tested for its antibiotic response to identify new factors contributing to MRSA pathogenesis in antibiotic induction. The minimal inhibitory concentrations (MICs) of  $\beta$ -lactam antibiotics, including oxacillin (OXA), methicillin (MET), cefoxitin (FOX), imipenem (IMI), meropenem (MER), chloramphenicol (CHL), vancomycin (VAN), kanamycin (KAN), and erythromycin (ERY) against N315 were determined (S2 Table). The sodium dodecyl sulfate–polyacrylamide gel electrophoresis (SDS-PAGE) revealed that a protein band (approximately 30 kDa) was upregulated in the subinhibitory concentrations of  $\beta$ -lactam-treated bacteria compared with the nontreatment control (Fig 1A). By contrast, CHL, VAN, KAN, and ERY did not have induction effects on this protein band. Further observations indicated that the subinhibitory concentrations of OXA exerted a broad-spectrum induction effect on other major clinically prevalent MRSA clones, including ST88, ST239, ST59, ST1, and ST398, which displayed the same upregulated protein band as that in the

OXA-treated MRSA compared with the nontreatment one (Fig 1B).

The protein band was excised from the SDS-PAGE gel and analyzed through liquid chromatography tandem mass spectrometry (LC-MS/MS) to characterize the  $\beta$ -lactam-induced proteins in the MRSA strains. The detected peptides matched with 68 proteins in the N315 proteome (S3 Table). Most known metabolic enzymes were excluded, and three putative Tlpps, namely, Tlpp3 (SA2273), Tlpp2 (SA2274), and Tlpp1(SA2275), encoded by a consecutive gene cluster were selected on the basis of theoretical molecular weights for the analysis (Fig 2A and S1 Table). SA2273, SA2274, and SA2275 were annotated as hypothetical proteins in the N315 genome (GenBank accession no. BA000018.3). A typical Lpp precursor contained a signal peptide at the N-terminal and a characteristic conserved three-amino acid lipobox in front of the invariable cysteine [(LVI) (ASTG) (GA) $\downarrow$ C] [16,17]. Both Tlpp1 and Tlpp3 possessed signal peptides and “lipobox” sequences, whereas Tlpp2 comprised a transmembrane helix domain at the N-terminal (S1A Fig). These proteins were annotated as Tlpps belonging to a domain of unknown function (DUF) 576 protein family on the Pfam database [22]. Considering that Tlpps account for more than 62.6% of amino acid identity (S1B Fig), we prepared recombinant Tlpp1 proteins (Fig 1C) and the corresponding antibodies, and verified the authority of the  $\beta$ -lactam-stimulated proteins through Western blot analysis (Fig 1D). Although several MRSA clones, such as ST8 and ST239, contained only two of the three *tlpps* in their genomes, the *tlpp* cluster was widely distributed among the major prevalent MRSA clones (S4 Table). This observation was consistent with the finding that several major MRSA clonal strains upregulated Tlpps in response to the subinhibitory concentrations of  $\beta$ -lactam treatment (Fig 1B).

***tlpp1*, *tlpp2*, and *tlpp3* were co-transcribed, and their expression was induced by  $\beta$ -lactam antibiotics in a dose- and time-dependent manner**

Reverse-transcription polymerase chain reaction (RT-PCR) was performed using RNA extracted from MRSA N315 by specific primers to test whether *tlpp1*, *tlpp2*, and *tlpp3* were co-transcribed (Fig 2A and S5 Table). The comparison of the RT-PCR

results with the template of the genomic DNA or RNA only revealed that *tlpp1*, *tlpp2*, and *tlpp3* were co-transcribed from the *tlpp1* promoter (Fig 2B). We further examined the influence of  $\beta$ -lactams on *tlpp* expression. Reverse-transcription quantitative PCR (RT-qPCR) showed that the mRNA levels of *tlpp1*, *tlpp2*, and *tlpp3* were upregulated in N315 after treatment with the subinhibitory concentrations of OXA (Fig 2C). Western blot analysis demonstrated that the protein levels of Tlpps in both N315 total cell lysates (Fig 2D and 2E) and the culture supernatant (Fig 2F and 2G) increased in a dose-dependent manner after OXA treatment was administered. Tlpp expression was also upregulated by N315 in a dose-dependent manner after MET treatment was given (S2 Fig). Furthermore, the Tlpp expression by N315 increased in a time-dependent manner after OXA treatment was administered (Fig 2H and 2I). These results verified that MRSA Tlpps could be released from the bacteria and secreted to the culture, and their production was influenced by the subinhibitory concentrations of  $\beta$ -lactam antibiotics.

## **$\beta$ -lactam-induced Tlpps triggered proinflammatory cytokine production by macrophages**

In Gram-negative bacteria, the cell wall-associated lipopolysaccharides are the main molecules involved in activating the innate immune system of hosts via TLR4 interaction [23], while in Gram-positive bacteria, the releasable Lpps may be the main factor that exert a similar function by triggering the TLR2-MyD88-NF- $\kappa$ B signaling pathway, thereby inducing proinflammatory cytokines [17,19]. To determine whether the  $\beta$ -lactam-induced MRSA Tlpps involved in the innate immune activation, we cultured mouse RAW264.7 macrophages in media containing 5% culture supernatant of N315 post-treated with different concentrations of OXA for 6 h. We then determined the levels of proinflammatory cytokines, such as IL-6 and TNF $\alpha$ , in the cell-cultured media (DMEN). The results revealed that IL-6 and TNF $\alpha$  levels were gradually increased by macrophages stimulated by the culture supernatant of N315 treated with OXA in a dose-dependent manner (Fig 3A and 3B). Then, we wondered whether the MRSA Tlpps promoted the cytokine expression in macrophages, a *tlpps*



deletion mutant (N315 $\Delta$ *tlpps*) with a pYT3- $\Delta$ *tlpps* plasmid and a *tlpps*-overexpressing strain (N315 $\Delta$ *tlpps*/pLI-*tlpps*) with a pLI-*tlpps* plasmid (Fig 3C and S3 Fig) were constructed for macrophage infection. Results showed that the production of IL-6 and TNF $\alpha$  in macrophages significantly decreased after treated with N315 $\Delta$ *tlpps* at a multiplicity of infection (MOI) of 30 compared with those of the wild-type N315 administered. By contrast, higher levels of IL-6 and TNF $\alpha$  were detected in macrophages treated with N315 $\Delta$ *tlpps*/pLI-*tlpps* but not with N315 $\Delta$ *tlpps*, which carried an empty pLI50 vector (Fig 3D and 3E). Similar results were observed when the bacterial culture supernatant was used (Fig 3G and 3H) because of the loss of Tlpp expression in the supernatant of N315 $\Delta$ *tlpps* (Fig 3F), indicating that the increased levels of IL-6 and TNF $\alpha$  by macrophages depended on the expression of N315 Tlpps that responded to  $\beta$ -lactams in a dose-dependent manner. However, the recombinant Tlpp1 purified from *Escherichia coli* (Fig 1C) exhibited no effect on the levels of IL-6 and TNF $\alpha$  by macrophages (S4 Fig), suggesting that a correctly triacylated Tlpp or a long-chain N-acylated Lpp was needed for the recognition by TLR2–TLR1 receptors to trigger immune response by macrophages [24].

## **Tlpps contributed to the virulence of MRSA**

Consistent with the observed immune response by macrophages, the levels of IL-6 and TNF $\alpha$  in mice 6 h post-challenge with  $1 \times 10^7$  N315 $\Delta$ *tlpps* cells by tail vein injection were significantly lower than those of N315 was administered (Fig 4A and 4B). The complementary overexpression of *tlpps* (N315 $\Delta$ *tlpps*/pLI-*tlpps*) strain stimulated even higher levels of IL-6 and TNF $\alpha$  in mice, but not of the empty pLI50 plasmid-carrying strain (N315 $\Delta$ *tlpps*/pLI50). We also investigated whether the *tlpp* cluster of MRSA was associated with the bacterial burden in a mouse model. The mice were infected intravenously with pGFP plasmid-transformed N315 and N315 $\Delta$ *tlpps* for 5 days (S6 Table), and bacterial colonization was tracked through an animal imaging system. The fluorescence intensity of the GFP in the murine organs (i.e., heart, lung, liver, spleen, and kidney) was measured, and the results indicated that the radiant efficiency in the kidneys of the mice injected with N315 was



significantly higher than those infected with N315 $\Delta$ *tlpps* (Fig 4C and 4D). Consistent with the radiant efficiency, the bacterial loads in the kidneys of the N315-infected mice were also significantly higher than that of the N315 $\Delta$ *tlpps*-infected ones (Fig 4E). Overall, these data suggested that the systemic inflammatory response in MRSA infection was associated with Tlpps, and MRSA Tlpps contributed to bacterial colonization and virulence.

# **$\beta$ -lactam-antibiotic-stimulated Tlpps promoted the pathogenesis of MRSA**

We determined whether  $\beta$ -lactam-stimulated Tlpps enhanced the pathogenesis of MRSA. A mouse subcutaneous infection model was used to evaluate the contribution of the subinhibitory concentrations of OXA or Tlpps to skin and soft tissue infections. The mice were subcutaneously injected in both flanks with  $5 \times 10^7$  OXA-treated N315 and N315 $\Delta$ *tlpps* cells and intraperitoneally injected with 1  $\mu$ g of OXA per gram weight twice a day for 14 days. The course of infection was monitored every day. The untreated N315- and N315 $\Delta$ *tlpps*-infected and PBS-injected mice served as the controls. The abscesses caused by the OXA-treated N315 was significantly larger than those caused by the OXA-treated N315 $\Delta$ *tlpps*, untreated N315, and untreated N315 $\Delta$ *tlpps* (Fig 5A), and this observation was further shown in the photographs of the skin lesions (Fig 5B and S5 Fig). Histological examinations indicated that the skin of the OXA-treated N315-challenged mice exhibited less extensive inflammation with leukocyte infiltration, destroyed skin structure, and more flake-like abscess-formation than those of the untreated N315-infected and PBS-injected mice (Fig 5C). By contrast, the skin of the OXA-treated N315 $\Delta$ *tlpps*-challenged mice displayed more leukocyte infiltration and sporadic abscess formation than that of the untreated N315 $\Delta$ *tlpps*-infected and PBS-injected mice. The corium layer of the N315-challenged and PBS-injected mice showed an extensive inflammation with leukocyte infiltration, although abscess formation was not observed compared with that of the N315 $\Delta$ *tlpps*-infected and PBS-injected mice. These pathological phenomena might be caused by the  $\beta$ -lactam-stimulated MRSA Tlpps, which stimulated the IL-6 and TNF $\alpha$  levels in mice (Fig 5D and 5E), thereby silencing the

immune responses through granulocytic and monocyticmyeloid-derived suppressor cells induced by IL-6 [17], increasing immune cells death due to the tremendous TNF $\alpha$  release [24], and promoting bacterial colonization and abscess formation. Overall, these data confirmed that  $\beta$ -lactam-stimulated Tlpps worsened the MRSA infections.

### **$\beta$ -lactam-stimulated Tlpp expression in MRSA was SarA dependent**

$\beta$ -lactams as antibiotics block the cell wall synthesis of bacteria to exert antimicrobial effects. By contrast,  $\beta$ -lactams as inducers may trigger global regulatory networks to modulate virulence in *S. aureus* [13]. RT-qPCR revealed that the expression of global regulators, including *sarA*, *agrA*, *RNAlII*, *rot*, *ccpA*, and *saeR*, increased in OXA-treated N315 compared with those in the untreated ones (Fig 6A). *SarA* and *agrA* were the most altered regulators, whereas *sigB* was unchanged, which was consistent with the Western blot results of SigB stimulated with different OXA concentrations (S6 Fig). AgrA is a downstream regulator of SarA [25]. In this study, we examined whether SarA was upregulated in N315 upon OXA treatment. Western blot analysis indicated that both SarA and Tlpps increased in a dose-dependent manner in response to the  $\beta$ -lactam antibiotic treatment (Fig 6B, 6C and S2 Fig). The deletion of *sarA* reduced the Tlpps levels in both N315 and its culture supernatant (Fig 6D and S7 Fig). The *sarA* overexpressing strain (N315 $\Delta$ *sarA*/pLI-*sarA*) produced even more Tlpps compared with the wild type N315, whereas the empty pLI50 plasmid-carrying strain (N315 $\Delta$ *sarA*/pLI50) did not. Consistent with the decreased Tlpps in N315 $\Delta$ *sarA*, N315 $\Delta$ *sarA* or its culture supernatant stimulated less IL-6 and TNF $\alpha$  expression in RAW264.7 cells than N315 or its culture supernatant did. By contrast, N315 $\Delta$ *sarA*/pLI-*sarA* or its culture supernatant induced more IL-6 and TNF $\alpha$  expression than the wild-type N315 or N315 $\Delta$ *sarA*/pLI50 did (S8 Fig). The IL-6 and TNF $\alpha$  levels in mice challenged with N315 $\Delta$ *sarA* decreased compared with those in the mice challenged with N315. N315 $\Delta$ *sarA*/pLI-*sarA* stimulated even higher cytokine levels in mice compared with those of N315 or N315 $\Delta$ *sarA* induced (Fig 6E and 6F). Taken together, these data indicated that the  $\beta$ -lactam-stimulated Tlpp

expression in MRSA was SarA dependent.

### **SarA directly controlled the $\beta$ -lactam-stimulated Tlpp expression in MRSA**

To investigate the effect of SarA on  $\beta$ -lactam-stimulated Tlpp expression, we constructed a reporter vector (pOS1-*tlpps*<sup>P</sup>) containing the *tlpp* promoter-controlled *lacZ* gene (S6 Table) and performed  $\beta$ -galactosidase assay by transforming pOS1-*tlpps*<sup>P</sup> into the MRSA strains N315 and N315 $\Delta$ *sarA*. The results revealed that the  $\beta$ -galactosidase activity was significantly lower in the *sarA* mutant than that in N315. Moreover, the  $\beta$ -galactosidase activity presented no significant change in the *sarA* mutant after OXA treatment compared with the untreated N315 $\Delta$ *sarA* (Fig 7A). However, OXA treatment significantly increased the  $\beta$ -galactosidase activity in N315, and this increase was consistent with the increasing Tlpp in MRSA strains (Fig 7A, Fig 1A and 1B). Consistent with the  $\beta$ -galactosidase assay results, Western blot analysis demonstrated that the Tlpp expression in the *sarA* mutant could not respond to  $\beta$ -lactam simulation (Fig 7B and 7C), suggesting that SarA controlled the Tlpp expression in response to the  $\beta$ -lactam antibiotic induction.

A global regulator can recognize specific motifs in the promoter regions of a certain gene, thereby controlling the gene expression [13,26,27]. We analyzed the binding motif of SarA [28,29] in the promoter regions of *tlpps* and found a typically predicted SarA box (Fig 7D). The recombinant His-tagged SarA was prepared and purified from *E. coli* (S7C Fig), and the electrophoretic mobility shift assay (EMSA) showed that the recombinant SarA proteins bound to the *tlpp* cluster promoter region that carried the putative SarA binding box (Fig 7 E, 7F and 7H). No shifting band was observed when the AT-rich SarA box was mutated to become GC-rich (Fig 7E, 7G and 7H). These data indicated that *S. aureus* SarA could directly bind to the *tlpp* cluster promoter region, thereby upregulating the *tlpp* expression in the presence of  $\beta$ -lactams. The AT-rich motif (ATTTAAT) in the promoter regions of *tlpps* is essential for SarA binding and regulating.

## Discussion

MRSA is distinct from MSSA in terms of the acquisition of a genetic element called staphylococcal cassette chromosome *mec* (SCC*mec*) in which *mecA* encodes an alternative penicillin-binding protein 2a (PBP2a) with a low affinity for  $\beta$ -lactams [21]. As such, MRSA strains are resistant to nearly all  $\beta$ -lactam antibiotics [6]. As antibiotics,  $\beta$ -lactams bind to penicillin-binding proteins (PBPs) and inhibit the transpeptidation and transglycosylation of the cell wall, resulting in a weakened cell wall and inducing cell lysis and death [30]. This type of antibiotics, particularly cephalosporins and  $\beta$ -lactam/ $\beta$ -lactamase inhibitor combinations, has been empirically used for clinical treatments of infectious diseases [31]. The subinhibitory concentrations of antistaphylococcal agents might arise because of antibiotic-resistant microorganisms or pharmacokinetics of antibiotics [13,31]. For MRSA infections, which are not initially recognized,  $\beta$ -lactams are not only ineffective in the treatment of infections but also likely contributing to poor outcomes by enhancing the pathogenicity of MRSA. Nonetheless, the underlying mechanisms remain obscure [9]. In this study, we showed that a three-gene constituent *tlpp* cluster upregulated in response to  $\beta$ -lactam induction in a dose- and time-dependent manner. This *tlpp* cluster, belonging to a DUF576 protein family of unknown function [19,22], was widely distributed among the major prevalent MRSA clones (Fig 1B and S4 Table). Tlpps could be upregulated after treatment with nearly all  $\beta$ -lactam antibiotics, such as penicillin (oxacillin and methicillin), cephalosporins (cefoxitin), and carbapenems (imipenem and meropenem), but not with vancomycin, kanamycin, and erythromycin (Fig 1A).

In addition to antimicrobial activity, signal induction may be implemented by the subinhibitory concentrations of  $\beta$ -lactams. They actively promote *S. aureus* biofilm formation [3], induce PBP2a to reduce peptidoglycan crosslinking in MRSA [6], and enhance virulence factors, such as alpha-toxins, PVL, SPA, and enterotoxins [2,32-34]. In contrast to  $\beta$ -lactam-stimulated SPA and PVL, which have a controversial pathogenic role in *S. aureus* [2], the Lpps of *S. aureus* are crucial

players in alerting the host immune system by recognizing TLR2/TLR1 or TLR2/TLR6 receptors [24,35]. In general, the Lpps of Gram-positive bacteria are anchored in the outer leaflet of the cytoplasmic membrane [17]. We observed that the  $\beta$ -lactam-stimulated MRSA Tlpps could be released; Tlpps could be detected in both cell lysates and the culture supernatant through Western blot analysis (Fig 2D, 2F, 3C and 3F). MRSA Tlpps could induce the production of IL-6 and TNF $\alpha$  proinflammatory cytokines of macrophages which stimulated with the culture supernatant of N315 post-treated with different OXA concentrations (Fig 3A and 3B). Although the *tlpp* deletion mutant (N315 $\Delta$ *tlpps*) infection induced less IL-6 and TNF $\alpha$  production in mice compared with the wild-type N315 was administrated, OXA-treated N315 $\Delta$ *tlpps*-infected mice still produced higher IL-6 and TNF $\alpha$  cytokines compared with those of the untreated N315-challenged mice (Fig 5D and 5E), suggesting that other mechanisms might be involved in the immune system modulation by  $\beta$ -lactam-treated MRSA. For instance,  $\beta$ -lactam-promoted PBP2a induction can diminish the peptidoglycan crosslinking, thereby enhancing phagocytic degradation and detection and resulting in strong IL-1 $\beta$  production [6].

In addition to stimulating the immune system, increasing the pathogenicity of MRSA was attributed to  $\beta$ -lactam-stimulated Tlpps. In comparison with wild-type N315, the N315 $\Delta$ *tlpps* strain significantly decreased the bacterial burden in mouse kidneys (Fig 4C, 4D and 4E).  $\beta$ -lactam antibiotic treatment exacerbated MRSA infections in the mouse skin infection model, and the histological examinations of the OXA-treated N315-challenged mouse skin displayed less extensive infiltration with leukocytes, destroyed skin structure, and easily promoted abscess formation (Fig 5). A possible explanation is that the induced IL-6 and TNF $\alpha$  expression by  $\beta$ -lactam-stimulated MRSA Tlpps silenced the innate immune responses [24], thereby facilitating MRSA colonization and infection. Our findings might indicate that MRSA infections were associated with higher morbidity and mortality than MSSA [7,36].

$\beta$ -lactams can induce PVL expression in *S. aureus* by interfering with PBP1 and triggering SarA and Rot global regulators [2]. Our results showed that SarA and AgrA were the most upregulated regulators in MRSA N315 after OXA treatment (Fig 6A).

The deletion of SarA (N315 $\Delta$ *sarA*) failed to upregulate *tlpps* even under OXA treatment (Fig 7A and 7B), indicating that the  $\beta$ -lactam-induced Tlpp expression in MRSA was SarA controlled. EMSA data revealed that the regulation of SarA on Tlpp expression was direct (Fig 7F). However, further investigations should be performed to clarify how  $\beta$ -lactams trigger the SarA expression.

In conclusion, this work focused on the function and regulation of a new *tlpp* cluster in response to the induction of subinhibitory concentrations of  $\beta$ -lactams. We demonstrated that the increased Tlpps in MRSA significantly enhanced inflammatory response by triggering IL-6 and TNF $\alpha$  levels in vitro and in vivo, thereby possibly contributing to bacterial pathogenicity and worsening the outcome of MRSA infection by reducing host immune responses and promoting bacterial colonization.  $\beta$ -lactam-stimulated MRSA Tlpps was SarA dependent, and the upregulation in Tlpp expression after  $\beta$ -lactam treatment was directly controlled by the global regulator SarA (Fig 8). Nonetheless the pathways leading to the SarA expression triggered by  $\beta$ -lactam antibiotics remain unknown. Our data support the recommendation to clinicians that the discreet usage of  $\beta$ -lactams which possibly worsened the clinical outcome of MRSA infections.

## Materials and methods

### Ethics statement

BALB/c mice were purchased from Laboratory Animal Center of Army Medical University (Third Military Medical University). All animal experiments were approved by the Army Medical University Institutional Animal Care and Use Committee (protocol #SYXK-PLA-20120031). All animal experimental procedures were performed in accordance with the Regulations for the Administration of Affairs Concerning Experimental Animals approved by the State Council of People's Republic of China.

## Bacterial strains and plasmids

Bacterial strains and plasmids used in this study were listed in [S6 Table](#). *E. coli* strains DH5 $\alpha$  and BL21 (DE3) were cultivated in Luria Broth (LB) medium (Oxoid). *S. aureus* strains grown in Brain Heart Infusion (BHI) or Tryptic Soy Broth (TSB) medium (Oxoid).

## Antibiotic susceptibility tests

Antibiotic susceptibility was determined using broth microdilution methods according to the protocols recommended by the Clinical and Laboratory Standards Institute (CLSI, 2017) [37]. The antibiotic susceptibility results for all strains were listed in [S2 Table](#).

## Preparation of recombinant Tlpp1 and SarA

Recombinant Tlpp1 and SarA proteins were prepared in our laboratory. In brief, the gene encoding for Tlpp1 or SarA was amplified from the genomic DNA of N315 by PCR, and cloned into pET28a(+) vector to construct the pET28a-*tlpp1* and pET28a-*sarA* plasmids. Then, the recombinant plasmids were transformed into *E. coli* BL21(DE3) for the expression of Tlpp1-6 $\times$ His and SarA-6 $\times$ His fusion proteins. Cells were grown in LB with 100  $\mu$ g/ml of ampicillin at 37  $^{\circ}$ C. Isopropyl-D-thiogalactopyranoside (IPTG, 5  $\mu$ M) was added once an OD600 of 0.6 was achieved. The cells were cultured at 22  $^{\circ}$ C for another 6 h. The cells were then centrifuged at 10,000  $\times$  g for 15min, washed once with PBS, resuspended in the lysis buffer (50 mM Tris $\cdot$ Cl, 0.15 M NaCl, 1 mM phenylmethanesulfonyl fluoride (PMSF), 0.5mg/ml lysozyme, pH 8.0) and lysed using ultrasonic method. The recombinant proteins in the supernatant were purified by Ni-NTA affinity chromatography (GE Healthcare) and identified by Western blot.

## Preparation of protein-specific polyclonal antibodies

Female BALB/c mice (6–8 weeks) were immunized subcutaneously with 40  $\mu$ g of recombinant proteins (Tlpp1 or SarA) emulsified with complete Freund's adjuvant



(Sigma, USA) for the first time, and boosted with recombinant proteins (Tlpp1 or SarA) in incomplete Freund's adjuvant on day 14, 28, and 35, respectively. Seven days after the last immunization, blood samples were collected, the titer of antibodies against Tlpp1 or SarA was determined by ELISA.

#### **Preparation of the total bacteria proteins and the culture supernatant proteins**

Overnight MRSA culture was diluted 1:100 in BHI medium with or without the addition of  $\beta$ -lactam antibiotics, cultivated at 37 °C to an optical density (OD) at 600 nm of 2.0. Then, bacterial cells in 3 ml culture were harvested by centrifugation at  $10,000 \times g$  at 4 °C. The cell pellets were washed twice with PBS, resuspended in 1 ml of cold PBS supplemented with 1%  $\beta$ -mercaptoethanol (Sigma, USA) and 1 mM PMSF (Beyotime, China) on ice. Cells were broken by the addition of 0.1-mm diameter zirconia/silica beads, shaking on the Minibeadbeater 16 instrument (Biospec, USA). Cell debris was removed after centrifugation at  $10,000 \times g$  for 10 min at 4 °C, and the total cell proteins in 1 ml of the supernatant were precipitated with 7.5% trichloroacetic acid (TCA)/0.2 % deoxycholic acid solution.

The culture supernatant of MRSA stimulated with or without antibiotics was harvested by centrifugation at  $10,000 \times g$  for 10 min at 4 °C. The proteins in 1 ml culture supernatant were prepared by TCA precipitation, collected by centrifugation at  $15,000 \times g$  for 10 min, washed once with ice-cold acetone, dissolved in 60  $\mu$ l of PBS for use. The protein concentration was determined using the Bradford Protein Assay Kit (Beyotime, China).

#### **Proteomic analysis**

LC-MS/MS was performed to identify proteins induced by  $\beta$ -lactam antibiotics as previously described [38]. MRSA strain N315 was cultured in TSB with or without 2  $\mu$ g/ml OXA. The total bacteria proteins were separated through SDS-PAGE, and the antibiotic-induced protein band was excised and analyzed through LC-MS/MS by using UltiMate3000 RSLCnano liquid chromatography/Bruker maxis 4G Q-TOF. The resulting peptide mass fingerprints were compared against the ORFs of N315 by using

Mascot and Mascot Daemon software (Matrix Science).

## RT-PCR and RT-qPCR

Total MRSA N315 RNA was extracted as previously described [39]. Overnight N315 cultures were 1:100 diluted in TSB containing 2 µg/ml OXA, cultivated at 37 °C to the early exponential phase (OD600 = 1.0). Total RNA was isolated using the TriPure isolation reagent (Roche Applied Science, Germany) after the collected cells were firstly lysed using lysostaphin (Sigma, USA). cDNA was synthesised from 500 ng of total RNA using gene-specific primers and a RevertAid First Strand cDNA Synthesis Kit (Thermo, USA). RT-PCR was used to test whether *tlpp1*, *tlpp2*, and *tlpp3* were cotranscribed. RT-qPCR was performed to detect the expression levels of the *tlpp* genes (*tlpp1*, *tlpp2* and *tlpp3*) and the global regulators (*sarA*, *agrA*, *RNAIII*, *rot*, *ccpA*, *saeR*, *sigB*) using SsoAdvanced™ Universal SYBR® Green Supermix (Bio-Rad, USA). The relative expression level of all tested genes was normalized to that of the 16S *rRNA*. All primers used are listed in S5 Table.

## Construction of gene mutant strains

The *tlpp* cluster marker-less deletion mutant was constructed using homologous recombinant strategy described previously [39]. Briefly, the *tlpp* cluster deletion plasmid pYT3-Δ*tlpps* (S3A Fig) was constructed by amplifying the upstream and downstream regions of *tlpp* cluster with primer pairs, up-*tlpps* fwd/up-*tlpps* rev and down-*tlpps* fwd/down-*tlpps* rev, and subcloning these fragments into *E. coli*-*S. aureus* temperature-sensitive shuttle vector pYT3. The recombinant plasmid was identified by DNA sequencing and subsequently transformed into RN4220 by electroporation, then transformed into N315. The resulting N315Δ*tlpps* strain was generated after inducing the integration of plasmid into chromosome at 42 °C and following inducing the plasmid losing at 25 °C. The deletion of *tlpp* cluster was confirmed by PCR and DNA sequencing.

To construct the *tlpps* complementary strain, the *tlpp* cluster containing its potential promoter region was amplified by pLI-*tlpps* fwd/pLI-*tlpps* rev primer pairs,

cloned into the expression plasmid pLI50 [40]. Then, the correctly constructed plasmid pLI-*tlpps* was electroporated into RN4220 and then N315Δ*tlpps* to generate N315Δ*tlpp*/pLI-*tlpps* strain. Similar strategy was used to construct N315Δ*sarA*/pLI-*sarA*. The empty pLI50 plasmid transformed N315Δ*tlpps* and N315Δ*sarA* strains served the controls. All primers used are listed in S5 Table.

## Cytokine determination

RAW264.7 (TIB-71™, ATCC) cells were cultured in high glucose DMEM (Thermo Fisher Scientific, USA) added 10 % (v/v) fetal bovine serum (Thermo Fisher Scientific, USA) at 37 °C with 5 % CO<sub>2</sub>. For stimulation experiment, RAW264.7 cells (10<sup>6</sup>/well) were either infected with MRSA strain (MOI of 30), or cultured in DMEM medium containing 5% (v/v) bacterial culture supernatant, in a 24-well microtiter plate for 6 h as described [41]. Then, the supernatant was collected, and the levels of IL-6 and TNFα were measured with an ELISA kit following the manufacturer's instructions (R&D Systems, USA).

To detect the ability of Tlpp proteins in inducing cytokine secretion in vivo, female BALB/c mice were infected via tail vein injection with 1 × 10<sup>7</sup> CFU of N315, N315Δ*tlpps*, N315Δ*tlpps*/pLI-*tlpps*, N315Δ*tlpps*/pLI50, N315Δ*sarA*, N315Δ*sarA*/pLI-*sarA*, and N315Δ*sarA*/pLI50, respectively. Blood samples were collected 6 h post infection, and the IL-6 and TNFα levels in mouse sera were determined by using ELISA.

## Animal experiments

BALB/c mice were randomly divided into two groups and infected via tail vein injection with 1 × 10<sup>7</sup> CFU of the GFP-expression plasmid (pGFP) transformed N315 or N315Δ*tlpps*, sacrificed 5 days after infection. Mouse organs (i.e., heart, lung, liver, spleen, and kidney) were isolated and subjected to the determination of GFP fluorescence efficiency in the organs with IVIS® Lumina LT system and analyzed by Living Image 4.4 Software. The bacterial loads in the infected kidneys were also counted via plate dilution assay as described [42].

For skin abscess formation, BALB/c mice were fully anesthetized with 1 % pentobarbital sodium (50 mg/kg) and the back hair was depilated completely with 6 % sodium sulfide (w/v). Then, mice were subcutaneously inoculated with  $5 \times 10^7$  CFU of MRSA N315 and N315 $\Delta$ *tlpps* in both flanks of the murine back as described [43], and then randomly divided into two groups. The mice of the treatment group were intraperitoneally injected with 1  $\mu$ g of OXA per gram weight twice a day for 14 days. The PBS-injected mice served as the controls. The abscess area assessed by the maximal length  $\times$  width of the developing ulcer was measured daily.

For histopathological examination, the skin lesions were fixed by 4 % paraformaldehyde, paraffin embed, and stained with hematoxylin & eosin (H&E).

### **$\beta$ -galactosidase assay**

A *tlpp* promoter-LacZ reporter plasmid (pOS1-*tlpps*<sup>P</sup>) was constructed by inserting the *tlpp* promoter region into pOS1 vector, and transformed into N315 and N315 $\Delta$ *sarA*, respectively. Then, pOS1-*tlpps*<sup>P</sup>-carried N315 and N315 $\Delta$ *sarA* were cultured overnight, diluted 1:100 in BHI, and cultivated at 37 °C to an OD600 of 0.6. Bacterial cells in 200  $\mu$ l culture were collected by centrifugation, suspended in 100  $\mu$ l of AB buffer (100 mM KH<sub>2</sub>PO<sub>4</sub>, 100 mM NaCl, pH 7.0), and treated with lysostaphin (20  $\mu$ g/ml, Sigma) for 15 min at 37 °C. Then, the suspension was added with another 900  $\mu$ l of ABT solution (AB buffer containing 0.1 % TritonX-100) [44], 50  $\mu$ l of the solution was mixed with 10  $\mu$ l of MUG (4-methylumbelliferyl- $\beta$ -D-galactoside, 4 mg/mL, Sigma) and incubated for 1 h at room temperature. Then, 20  $\mu$ L of the sample was mixed with 180  $\mu$ l of ABT solution, and the reaction was monitored at 445 nm with an excitation wavelength of 365 nm. All samples were tested in triplicate. The LacZ activity was normalized to the cell density of OD600, and the relative activity was calculated by setting the LacZ activity from the N315 to 100%. The assay was repeated at least three times.

### **Electrophoretic mobility shift assays (EMSA)**

The predicted *tlpp* cluster promoter, an AT-rich motif fragment (56 bp), was

synthesized using the primer pairs (EMSA-*tlpps*<sup>P</sup> fwd/EMSA-*tlpps*<sup>P</sup> rev) as described [45]. The corresponding mutated GC-rich motif fragment was also synthesized by primer pairs EMSA-*tlpps*<sup>PM</sup> fwd/EMSA-*tlpps*<sup>PM</sup> rev and served as the control. Ten picomole of DNA fragment was incubated with a variable amount of recombinant SarA (0 to 240 pM) in a 20 µl reaction mixture containing 10 mM HEPES (pH 7.6), 1 mM EDTA, 2 mM dithiothreitol, 50 mM KCl, 0.05 % Triton X-100, and 5 % glycerol. Binding reactions were equilibrated for 20 min at room temperature before electrophoresis. Reaction mixtures were separated on 6 % native polyacrylamide gel electrophoresis in 0.5 × TBE (Tris/boric acid/EDTA) buffer at 90 V for 2 h at 4 °C. Gels were stained by GelRed dye (Biotium, USA) and observed under UV light. The primers used are listed in S5 Table.

## Statistical analysis

Statistical analysis was carried out using GraphPad Prism 6.0. Unpaired two-tailed student's t-test, analysis of variance (ANOVA) and Mann-Whitney test were used appropriately to compare the difference between groups. Each experiment was carried out at least three times. Results were presented as mean ± standard deviations (S.D.), and a *P* value less than 0.05 was considered statistically significant. \* *P* < 0.05, \*\* *P* < 0.01, \*\*\* *P* < 0.001, and ns represented no significance.

## Supporting Information

**S1 Fig. Alignment of the tandem lipoproteins (Tlpps).** (A) Alignment of the Tlpp1, Tlpp2, and Tlpp3 signal peptide and the lipobox sequence. (B) Alignment of the Tlpp1, Tlpp2, and Tlpp3 proteins. The amino acid sequences of the indicated protein were retrieved from UniProt (<http://www.uniprot.org/>), and the alignment was conducted through the BioEdit program. The identical amino acids were colored. (TIF)

**S2 Fig. Western blot analysis of Tlpps and SarA in N315 with different concentrations of MET treatment.** (A) Tlpps and SarA upregulated in N315 with

MET treatment in a dose-dependent manner. The molecular weights of the protein marker (M) were indicated on the left. LC, loading control. (B) Evaluation of gray value of the N315 Tlpps and SarA in each lane using ImageJ software. The relative value of Tlpps or SarA/loading control (LC) in the first lane (0 µg/ml MET) was adjusted to 1.0, and the relative gray values in other lanes were calculated and indicated.

(TIF)

**S3 Fig. Construction of N315Δtlpps and N315Δtlpps/pLI-tlpps strains.** (A) Schematics for construction of the *tlpp* marker-less deletion plasmid pYT3-Δ*tlpps* and the complementation plasmid pLI-*tlpps*. (B) Identification of N315Δ*tlpps* by PCR using primer pairs *c\_tlpps fwd/c\_tlpps rev* (S5 Table). (C) Identification of N315Δ*tlpps* by DNA sequencing.

(TIF)

**S4 Fig. The recombinant Tlpp1 proteins presented no effect on IL-6 and TNFα expression by macrophages.** (A) IL-6 and (B) TNFα levels produced by macrophages post-treated with the recombinant Tlpp1 proteins of 200 ng, 400 ng, or 600 µg were given. The cytokine levels were determined by ELISA after 6 h post-treated. LPS (200 ng) administrated was served as the positive control, and PBS-treated served as the negative control. The experiments were conducted in thrice. \*\*\*  $P < 0.001$ .

(TIF)

**S5 Fig. Abscesses in mice 7 days after infection.** The mice were subcutaneously injected in both flanks with  $5 \times 10^7$  OXA-treated N315 and N315Δ*tlpps* cells and intraperitoneally injected with 1 µg of OXA per gram weight twice a day for 14 days. The skin lesions were recorded at the 7en day post-infection. The abscesses caused by the OXA-treated N315 were larger than those caused by the OXA-treated N315Δ*tlpps*, PBS-treated N315, and PBS-treated N315Δ*tlpps*.

(TIF)

**S6 Fig. Western blot analysis of SigB in N315 with different concentrations of OXA treatment.** (A) SigB was not changed in N315 with OXA treatment. The

molecular weights of the protein marker (M) were indicated on the left. LC, loading control. (B) Evaluation of gray value of the N315 SigB in each lane using ImageJ software. The relative value of SigB/LC in the first lane (0 µg/ml OXA) was adjusted to 1.0, and the relative gray values in other lanes were calculated and indicated.

(TIF)

**S7 Fig. The deletion of *sarA* decreased the secretory Tlpp expression by N315.**

(A) Western blot analysis of the reduced expression of Tlpp proteins in the culture supernatant of N315Δ*tlpps*, which could be restored by the complementary *sarA* (N315Δ*sarA*/pLI-*sarA*) but not by the empty pLI50 plasmid-carrying strain (N315Δ*sarA*/pLI50). LC, loading control. (B) Evaluation of gray value of the Tlpp proteins in each lane using ImageJ software. The relative value of Tlpp/LC in the first lane (N315) was adjusted to 1.0, and the relative gray values in other lanes were calculated and indicated. (C) SDS-PAGE analysis of the recombinant SarA (His-tagged).

(TIF)

**S8 Fig. SarA mutant stimulated less IL-6 and TNFα production in macrophages.**

(A) IL-6 and (B) TNFα levels produced by macrophages post-treated with the culture supernatant of N315, N315Δ*sarA*, N315Δ*sarA*/pLI-*sarA*, and N315Δ*sarA*/pLI50, respectively. (C) IL-6 and (D) TNFα levels produced by macrophages infected with N315, N315Δ*sarA*, N315Δ*sarA*/pLI-*sarA*, and N315Δ*sarA*/pLI50 at an MOI of 30. The cytokine levels were determined by ELISA 6 h post-infection. The experiments in duplicate were conducted in thrice. ns represented no statistical significance, \*  $P < 0.05$ , \*\*  $P < 0.01$ , \*\*\*  $P < 0.001$ .

(TIF)

**S9 Fig. Growth curve of MRSA strain N315 in the culture media containing different concentrations of OXA as indicated.** Independent growth rates of different concentrations of OXA treated N315 were determined. The experiment was conducted in thrice, and the data were shown as mean ± S.D. The growth of MRSA N315 was significantly inhibited by more than 4 µg/ml of OXA was administrated at the early stage, although the MIC value of N315 against OXA was higher as



µg/ml (S2 Table) because of the heterogeneous β-lactam-resistant phenotype of MRSA [46]. Therefore, the subinhibitory concentrations of OXA, 2 µg/ml, was used unless specifically stated in this study.

(TIF)

**S10 Fig. Full Western blot data.** The full-length blots for all Western blot pictures.

The black boxes represented the depicted parts of the blot.

(TIF)

**S1 Table. Predicted Lpps of *S. aureus* N315.**

(DOCX)

**S2 Table. The MICs of MRSA strains.**

(DOCX)

**S3 Table. Proteins identified in the protein band of β-lactams induced MRSA**

**N315 by LC-MS/MS.**

(DOCX)

**S4 Table. The distribution of *tlpps* cluster in major MRSA clones.**

(DOCX)

**S5 Table. Primers used in this study.**

(DOCX)

**S6 Table. Strains and plasmids used in this work.**

(DOCX)

## Acknowledgments

We would like to thank the members of the Xiancai Rao and Xuhu Mao research groups for their critical reading of the manuscript. We thank Professor Baolin Sun (University of Science and Technology of China) providing plasmid pGFP and pLI50.

We also thank Professor Lefu Lan (Shanghai Institute of Materia Medica, Chinese Academy of Sciences) for providing plasmid pOS1.

## References

- 682 1. Gutierrez A, Laureti L, Crussard S, Abida H, Rodriguez-Rojas A, et al. (2013)
- 683 beta-Lactam antibiotics promote bacterial mutagenesis via an RpoS-mediated
- 684 reduction in replication fidelity. Nat Commun 4: 1610. PMID:23511474.
- 685 2. Dumitrescu O, Choudhury P, Boisset S, Badiou C, Bes M, et al. (2011)
- 686 Beta-lactams interfering with PBP1 induce Pantone-Valentine leukocidin
- 687 expression by triggering *sarA* and *rot* global regulators of *Staphylococcus*
- 688 *aureus*. Antimicrob Agents Chemother 55: 3261-3271. PMID:21502633.
- 689 3. Kaplan JB, Izano EA, Gopal P, Karwacki MT, Kim S, et al. (2012) Low levels of
- 690 beta-lactam antibiotics induce extracellular DNA release and biofilm
- 691 formation in *Staphylococcus aureus*. MBio 3: e00198-00112.
- 692 PMID:22851659.
- 693 4. Lowy FD (1998) *Staphylococcus aureus* infections. N Engl J Med 339: 520-532.
- 694 PMID:9709046.
- 695 5. Liu H, Shang W, Hu Z, Zheng Y, Yuan J, et al. (2018) A novel SigB(Q225P)
- 696 mutation in *Staphylococcus aureus* retains virulence but promotes biofilm
- 697 formation. Emerging microbes & infections 7: 72. PMID:29691368.
- 698 6. Muller S, Wolf AJ, Iliev ID, Berg BL, Underhill DM, et al. (2015) Poorly
- 699 Cross-Linked Peptidoglycan in MRSA Due to *mecA* Induction Activates the
- 700 Inflammasome and Exacerbates Immunopathology. Cell Host Microbe 18:
- 701 604-612. PMID:26567511.
- 702 7. Antonanzas F, Lozano C, Torres C (2015) Economic features of antibiotic
- 703 resistance: the case of methicillin-resistant *Staphylococcus aureus*.
- 704 Pharmacoeconomics 33: 285-325. PMID:25447195.
- 705 8. Barrios Lopez M, Gomez Gonzalez C, Orellana MA, Chaves F, Rojo P (2013)
- 706 *Staphylococcus aureus* abscesses: methicillin-resistance or Pantone-Valentine
- 707 leukocidin presence? Arch Dis Child 98: 608-610. PMID:23728388.
- 708 9. Watkins RR, David MZ, Salata RA (2012) Current concepts on the virulence
- 709 mechanisms of methicillin-resistant *Staphylococcus aureus*. J Med Microbiol
- 710 61: 1179-1193. PMID:22745137.
- 711 10. Paul M, Kariv G, Goldberg E, Raskin M, Shaked H, et al. (2010) Importance of

- 712 appropriate empirical antibiotic therapy for methicillin-resistant  
713 *Staphylococcus aureus* bacteraemia. J Antimicrob Chemother 65: 2658-2665.  
714 PMID:20947620.
- 715 11. Kim SH, Park WB, Lee KD, Kang CI, Bang JW, et al. (2004) Outcome of  
716 inappropriate initial antimicrobial treatment in patients with  
717 methicillin-resistant *Staphylococcus aureus* bacteraemia. J Antimicrob  
718 Chemother 54: 489-497. PMID:15254028.
- 719 12. Kernodle DS, McGraw PA, Barg NL, Menzies BE, Voladri RK, et al. (1995)  
720 Growth of *Staphylococcus aureus* with nafcillin in vitro induces alpha-toxin  
721 production and increases the lethal activity of sterile broth filtrates in a murine  
722 model. J Infect Dis 172: 410-419. PMID:7542686.
- 723 13. Hodille E, Rose W, Diep BA, Goutelle S, Lina G, et al. (2017) The Role of  
724 Antibiotics in Modulating Virulence in *Staphylococcus aureus*. Clin Microbiol  
725 Rev 30: 887-917. PMID:28724662.
- 726 14. Nielsen LN, Roggenbuck M, Haaber J, Ifrah D, Ingmer H (2012) Diverse  
727 modulation of *spa* transcription by cell wall active antibiotics in  
728 *Staphylococcus aureus*. BMC Res Notes 5: 457. PMID:22920188.
- 729 15. Shahmirzadi SV, Nguyen MT, Gotz F (2016) Evaluation of *Staphylococcus*  
730 *aureus* Lipoproteins: Role in Nutritional Acquisition and Pathogenicity. Front  
731 Microbiol 7: 1404. PMID:27679612.
- 732 16. Hutchings MI, Palmer T, Harrington DJ, Sutcliffe IC (2009) Lipoprotein  
733 biogenesis in Gram-positive bacteria: knowing when to hold 'em, knowing  
734 when to fold 'em. Trends Microbiol 17: 13-21. PMID:19059780.
- 735 17. Nguyen MT, Gotz F (2016) Lipoproteins of Gram-Positive Bacteria: Key Players  
736 in the Immune Response and Virulence. Microbiol Mol Biol Rev 80: 891-903.  
737 PMID:27512100.
- 738 18. Babu MM, Priya ML, Selvan AT, Madera M, Gough J, et al. (2006) A database of  
739 bacterial lipoproteins (DOLOP) with functional assignments to predicted  
740 lipoproteins. J Bacteriol 188: 2761-2773. PMID:16585737.
- 741 19. Nguyen MT, Kraft B, Yu W, Demircioglu DD, Hertlein T, et al. (2015) The vSaa

- 742 Specific Lipoprotein Like Cluster (*lpl*) of *S. aureus* USA300 Contributes to  
743 Immune Stimulation and Invasion in Human Cells. PLoS Pathog 11:  
744 e1004984. PMID:26083414.
- 745 20. Nguyen MT, Hanzelmann D, Hartner T, Peschel A, Gotz F (2016) Skin-Specific  
746 Unsaturated Fatty Acids Boost the *Staphylococcus aureus* Innate Immune  
747 Response. Infect Immun 84: 205-215. PMID:26502910.
- 748 21. Cheng H, Yuan W, Zeng F, Hu Q, Shang W, et al. (2013) Molecular and  
749 phenotypic evidence for the spread of three major methicillin-resistant  
750 *Staphylococcus aureus* clones associated with two characteristic antimicrobial  
751 resistance profiles in China. J Antimicrob Chemother 68: 2453-2457.  
752 PMID:23766485.
- 753 22. Schluepen C, Malito E, Marongiu A, Schirle M, McWhinnie E, et al. (2013)  
754 Mining the bacterial unknown proteome: identification and characterization of  
755 a novel family of highly conserved protective antigens in *Staphylococcus*  
756 *aureus*. Biochem J 455: 273-284. PMID:23895222.
- 757 23. Rogero MM, Calder PC (2018) Obesity, Inflammation, Toll-Like Receptor 4 and  
758 Fatty Acids. Nutrients 10. PMID:29601492.
- 759 24. Nguyen MT, Uebele J, Kumari N, Nakayama H, Peter L, et al. (2017) Lipid  
760 moieties on lipoproteins of commensal and non-commensal staphylococci  
761 induce differential immune responses. Nat Commun 8: 2246.  
762 PMID:29269769.
- 763 25. Reyes D, Andrey DO, Monod A, Kelley WL, Zhang G, et al. (2011) Coordinated  
764 regulation by AgrA, SarA, and SarR to control agr expression in  
765 *Staphylococcus aureus*. J Bacteriol 193: 6020-6031. PMID:21908676.
- 766 26. Peacock SJ, Paterson GK (2015) Mechanisms of Methicillin Resistance in  
767 *Staphylococcus aureus*. Annu Rev Biochem 84: 577-601. PMID:26034890.
- 768 27. Arya R, Princy SA (2013) An insight into pleiotropic regulators Agr and Sar:  
769 molecular probes paving the new way for antivirulent therapy. Future  
770 Microbiol 8: 1339-1353. PMID:24059923.
- 771 28. Liu Y, Manna AC, Pan CH, Kriksunov IA, Thiel DJ, et al. (2006) Structural and

- 772 function analyses of the global regulatory protein SarA from *Staphylococcus*  
773 *aureus*. Proc Natl Acad Sci U S A 103: 2392-2397. PMID:16455801.
- 774 29. Sterba KM, Mackintosh SG, Blevins JS, Hurlburt BK, Smeltzer MS (2003)  
775 Characterization of *Staphylococcus aureus* SarA binding sites. J Bacteriol 185:  
776 4410-4417. PMID:12867449.
- 777 30. Lim D, Strynadka NC (2002) Structural basis for the beta lactam resistance of  
778 PBP2a from methicillin-resistant *Staphylococcus aureus*. Nat Struct Biol 9:  
779 870-876. PMID:12389036.
- 780 31. Wushouer H, Tian Y, Guan XD, Han S, Shi LW (2017) Trends and patterns of  
781 antibiotic consumption in China's tertiary hospitals: Based on a 5 year  
782 surveillance with sales records, 2011-2015. PLoS One 12: e0190314.  
783 PMID:29281716.
- 784 32. Ohlsen K, Ziebuhr W, Koller KP, Hell W, Wichelhaus TA, et al. (1998) Effects of  
785 subinhibitory concentrations of antibiotics on alpha-toxin (*hla*) gene  
786 expression of methicillin-sensitive and methicillin-resistant *Staphylococcus*  
787 *aureus* isolates. Antimicrob Agents Chemother 42: 2817-2823.  
788 PMID:9797209.
- 789 33. Kuroda H, Kuroda M, Cui L, Hiramatsu K (2007) Subinhibitory concentrations of  
790 beta-lactam induce haemolytic activity in *Staphylococcus aureus* through the  
791 SaeRS two-component system. FEMS Microbiol Lett 268: 98-105.  
792 PMID:17263851.
- 793 34. Subrt N, Mesak LR, Davies J (2011) Modulation of virulence gene expression by  
794 cell wall active antibiotics in *Staphylococcus aureus*. J Antimicrob Chemother  
795 66: 979-984. PMID:21393149.
- 796 35. Hashimoto M, Tawaratsumida K, Kariya H, Aoyama K, Tamura T, et al. (2006)  
797 Lipoprotein is a predominant Toll-like receptor 2 ligand in *Staphylococcus*  
798 *aureus* cell wall components. Int Immunol 18: 355-362. PMID:16373361.
- 799 36. Ganga R, Riederer K, Sharma M, Fakih MG, Johnson LB, et al. (2009) Role of  
800 SCCmec type in outcome of *Staphylococcus aureus* bacteremia in a single  
801 medical center. J Clin Microbiol 47: 590-595. PMID:19144813.

37. CLSI. Performance Standards for Antimicrobial Susceptibility Testing, 27th Edn. Wayne, PA: CLSI (2017).
38. Yuan J, Yang J, Hu Z, Yang Y, Shang W, et al. (2018) Safe Staphylococcal Platform for the Development of Multivalent Nanoscale Vesicles against Viral Infections. Nano letters 18: 725-733. PMID:29253342.
39. Yuan W, Hu Q, Cheng H, Shang W, Liu N, et al. (2013) Cell wall thickening is associated with adaptive resistance to amikacin in methicillin-resistant *Staphylococcus aureus* clinical isolates. J Antimicrob Chemother 68: 1089-1096. PMID:23322605.
40. You Y, Xue T, Cao L, Zhao L, Sun H, et al. (2014) *Staphylococcus aureus* glucose-induced biofilm accessory proteins, GbaAB, influence biofilm formation in a PIA-dependent manner. Int J Med Microbiol 304: 603-612. PMID:24836943.
41. Curry H, Alvarez GR, Zwilling BS, Lafuse WP (2004) Toll-like receptor 2 stimulation decreases IFN- $\gamma$  receptor expression in mouse RAW264.7 macrophages. J Interferon Cytokine Res 24: 699-710. PMID:15684737.
42. Burts ML, Williams WA, DeBord K, Missiakas DM (2005) EsxA and EsxB are secreted by an ESAT-6-like system that is required for the pathogenesis of *Staphylococcus aureus* infections. Proc Natl Acad Sci U S A 102: 1169-1174. PMID:15657139.
43. Wen W, Liu B, Xue L, Zhu Z, Niu L, et al. (2018) Autoregulation and Virulence Control by the Toxin-Antitoxin System SavRS in *Staphylococcus aureus*. Infect Immun 86. PMID:29440365.
44. Sun F, Li C, Jeong D, Sohn C, He C, et al. (2010) In the *Staphylococcus aureus* two-component system sae, the response regulator SaeR binds to a direct repeat sequence and DNA binding requires phosphorylation by the sensor kinase SaeS. J Bacteriol 192: 2111-2127. PMID:20172998.
45. Correa EM, De Tullio L, Velez PS, Martina MA, Argarana CE, et al. (2013) Analysis of DNA structure and sequence requirements for *Pseudomonas aeruginosa* MutL endonuclease activity. J Biochem 154: 505-511.

PMID:23969026.

46. Aiba Y, Katayama Y, Hishinuma T, Murakami-Kuroda H, Cui L, et al. (2013) Mutation of RNA polymerase beta-subunit gene promotes heterogeneous-to-homogeneous conversion of beta-lactam resistance in methicillin-resistant *Staphylococcus aureus*. *Antimicrob Agents Chemother* 57: 4861-4871. PMID:23877693.

## Figure Captions

**Fig 1. Tlpps upregulated in MRSA post-treated with the subinhibitory concentrations of antibiotics.** (A) The proteins of different antibiotic-induced MRSA N315 were separated through SDS-PAGE and stained with Coomassie brilliant blue. An untreated N315 served as the negative control, and the molecular weights of the protein marker were indicated on the left. The upregulated protein bands upon  $\beta$ -lactam antibiotic treatment were denoted by yellow triangles. (B) Other major clinically prevalent MRSA strains represented by sequence type (ST) were cultured in the absence or presence of OXA (2  $\mu$ g/ml, unless specifically stated, [S2 Table](#) and [S9 Fig](#)). SDS-PAGE was then performed. The yellow triangles indicated that certain upregulated protein bands were similar to those of  $\beta$ -lactam-induced MRSA N315 (ST5). (C) SDS-PAGE analysis of the recombinant Tlpp1 proteins. (D) Western blot analysis of  $\beta$ -lactam-induced proteins in N315. The full-length blot was presented in [S10 Fig](#).

(TIF)

**Fig 2. Tlpp genes were co-transcribed and upregulated by OXA in a dose- and time-dependent manner.** (A) Genetic organization of the *tlpp* cluster in MRSA N315 genome and the location of primers designed for RT-PCR. (B) *tlpp1*, *tlpp2*, and *tlpp3* were co-transcribed tested by RT-PCR. Agarose gel electrophoresis analysis of PCR products amplified with the genomic DNA, reverse-transcribed cDNA, and RNA as templates. (C) RT-qPCR detection of the expression level of *tlpp1*, *tlpp2*, and *tlpp3* in N315 with or without OXA treatment was administered. \*\*  $P < 0.01$ . (D) Western



blot analysis of the Tlpp levels in N315 total cell lysates after different concentrations of OXA treatment was administered. The molecular weights of the protein marker (M) were indicated on the left. LC, loading control. (E) Evaluation of gray value of the N315 Tlpps in each lane using ImageJ software. The relative value of Tlpps/loading control (LC) in the first lane (0 µg/ml OXA) was adjusted to 1.0, and the relative gray values in other lanes were calculated and indicated. (F) Western blot analysis of the Tlpp levels in N315 culture supernatant (CS) after different concentrations of OXA treatment was administered. (G) Evaluation of gray value of Tlpps in N315 culture supernatant. (H) Western blot analysis of the Tlpp levels in N315 after OXA treatment was administered with time indicated. (I) Evaluation of gray value of Tlpps in N315 after OXA treatment was given with time indicated.

(TIF)

**Fig 3. Antibiotic-induced MRSA Tlpps stimulated proinflammatory cytokine production by macrophages.** IL-6 (A) and TNFα (B) levels increased by macrophages stimulated by 5% culture supernatant (CS) of N315 treated with different concentrations of OXA as indicated for 6 h. The cell culture of TSB stimulated cells served as the negative control. (C) Western blot analysis of the Tlpp proteins in N315Δtlpps and N315Δtlpps/pLI-tlpps. Wild type N315 and N315Δtlpps/pLI-50 served as the controls. IL-6 (D) and TNFα (E) levels elevated by macrophages stimulated with N315, N315Δtlpps, N315Δtlpp/pLI-tlpps, and N315Δtlpps/pLI50 at the MOI of 30. (F) Western blot analysis of the Tlpp proteins in the culture supernatant of N315Δtlpps and N315Δtlpps/pLI-tlpps. IL-6 (G) and TNFα (H) levels increased by macrophages treated with 5% culture supernatant (CS) of N315, N315Δtlpps, N315Δtlpp/pLI-tlpps, and N315Δtlpps/pLI50, respectively. The experiments were conducted in triplicate. ns represented no statistical significance, \*  $P < 0.05$ , \*\*  $P < 0.01$ , \*\*\*  $P < 0.001$ .

(TIF)

**Fig 4. Tlpps contributed to the inflammatory response and bacterial colonization in MRSA infection.** IL-6 (A) and TNFα (B) levels in mouse sera determined by ELISA. BALB/c mice were infected by tail vein injection with  $1 \times 10^7$  of N315,

N315 $\Delta$ *tlpps*, N315 $\Delta$ *tlpps*/pLI-*tlpps*, and N315 $\Delta$ *tlpps*/pIL50, respectively. The levels of IL-6 and TNF $\alpha$  in mouse sera were determined 6 h post-infection. Number of mice used,  $n = 3$ . Phosphate-buffered saline (PBS, pH 7.2) served as the negative control. (C) Organ distribution of N315 and N315 $\Delta$ *tlpps*. BALB/c mice were infected with  $1 \times 10^7$  pGFP plasmid transformed N315 and N315 $\Delta$ *tlpps*, the radiant efficiency of the indicated organs was measured with IVIS<sup>®</sup> Lumina LT system. (D) Tlpps contributed to the MRSA colonization. The radiant efficiency of N315-infected organs was higher than that of N315 $\Delta$ *tlpps*-infected ones. (E) Bacterial loads in kidney. BALB/c mice ( $n = 7$  for each group) were respectively infected with  $1 \times 10^7$  of N315 and N315 $\Delta$ *tlpps* for 5 days, bacteria were recovered and counted from kidneys. ns represented no significance, \*  $P < 0.05$ , \*\*  $P < 0.01$ .

(TIF)

**Fig 5.  $\beta$ -lactam treatment enhanced the pathogenesis of MRSA in the mouse**

**subcutaneous infection model.** (A) Mice were injected subcutaneously with  $5 \times 10^7$  bacterial cells. Abscess areas were measured daily. (B) Representative abscesses 7 days after infection. (C) Representative histological examinations (H&E stain) of the infected mouse skin. IL-6 (D) and TNF $\alpha$  (E) levels in mouse sera determined by ELISA. BALB/c mice were infected by tail vein injection with  $1 \times 10^7$  of N315, OXA-treated N315, and OXA-treated N315 $\Delta$ *tlpps*, respectively. The levels of IL-6 and TNF $\alpha$  in mouse sera were determined 6 h post-infection. Number of mice used,  $n = 3$ . PBS and OXA served as the controls. ns represented no significance, \*  $P < 0.05$ , \*\*  $P < 0.01$ , \*\*\*  $P < 0.001$ .

(TIF)

**Fig 6. SarA affected the Tlpp expression in MRSA.** (A) RT-qPCR detection of the

expression levels of global regulators in MRSA with or without OXA treatment. The expression of each gene in N315 was normalized to that of the 16S *rRNA* gene and adjusted to 1.0, the relative expressions of regulators in OXA-treated N315 were indicated. The experiments were repeated for three times. (B) Western blot analysis of SarA and Tlpp proteins in N315 treated with different concentrations of OXA. (C) Evaluation of gray value of Tlpp and SarA in N315 after OXA treatment. (D) The

deletion of *sarA* decreased the *Tlpp* expression in the N315. *SarA* mutant stimulated less IL-6 (E) and TNF $\alpha$  (F) production in mice. Mice were infected with  $1 \times 10^7$  of N315, N315 $\Delta$ *sarA*, N315 $\Delta$ *sarA* /pLI-*sarA*, and N315 $\Delta$ *sarA*/pLI50. The levels of IL-6 and TNF $\alpha$  in mouse sera were determined by ELISA 6 h post-infection. The experiments in duplicate were conducted for three times. ns represented no statistical significance, \*  $P < 0.05$ , \*\*  $P < 0.01$ , \*\*\*  $P < 0.001$ .

(TIF)

**Fig 7. *SarA* bound to the *tlpp* cluster promoter region to control the  $\beta$ -lactam-stimulated *Tlpp* expression in MRSA.** (A)  $\beta$ -galactosidase assay. The pOS1-*tlpps*<sup>P</sup> reporter plasmid was transformed into N315 and N315 $\Delta$ *sarA*, respectively. The LacZ activity was detected and represented as mean  $\pm$  S.D. ( $n = 3$ ). ns indicated no significance, \*\*\* $P < 0.001$ . (B) *SarA* controlled  $\beta$ -lactam-stimulated *Tlpp* expression in N315. (C) Evaluation of gray value of *Tlpps* and *SarA* in N315 and N315 $\Delta$ *sarA* with or without OXA treatment. (D) Predicted *SarA* box in the promoter regions of the *tlpp* cluster. (E) Mutation of AT-rich in the *tlpp* *SarA* box for EMSA experiment. (F) EMSA. Interaction between wild-type *tlpp* promoter region (*tlpps*-P) and *SarA* proteins was detected. (G) EMSA with *tlpp* promoter mutant (*tlpps*-PM). (H) Evaluation of gray value of the free probe in each lane using ImageJ software. The value of free probe in the first lane (0  $\mu$ g protein) was adjusted to 1.0, and the relative gray values in other lanes were calculated and indicated.

(TIF)

**Fig 8. Schematic of the *Tlpp* function and its upregulation in MRSA after  $\beta$ -lactam treatment.**

(TIF)

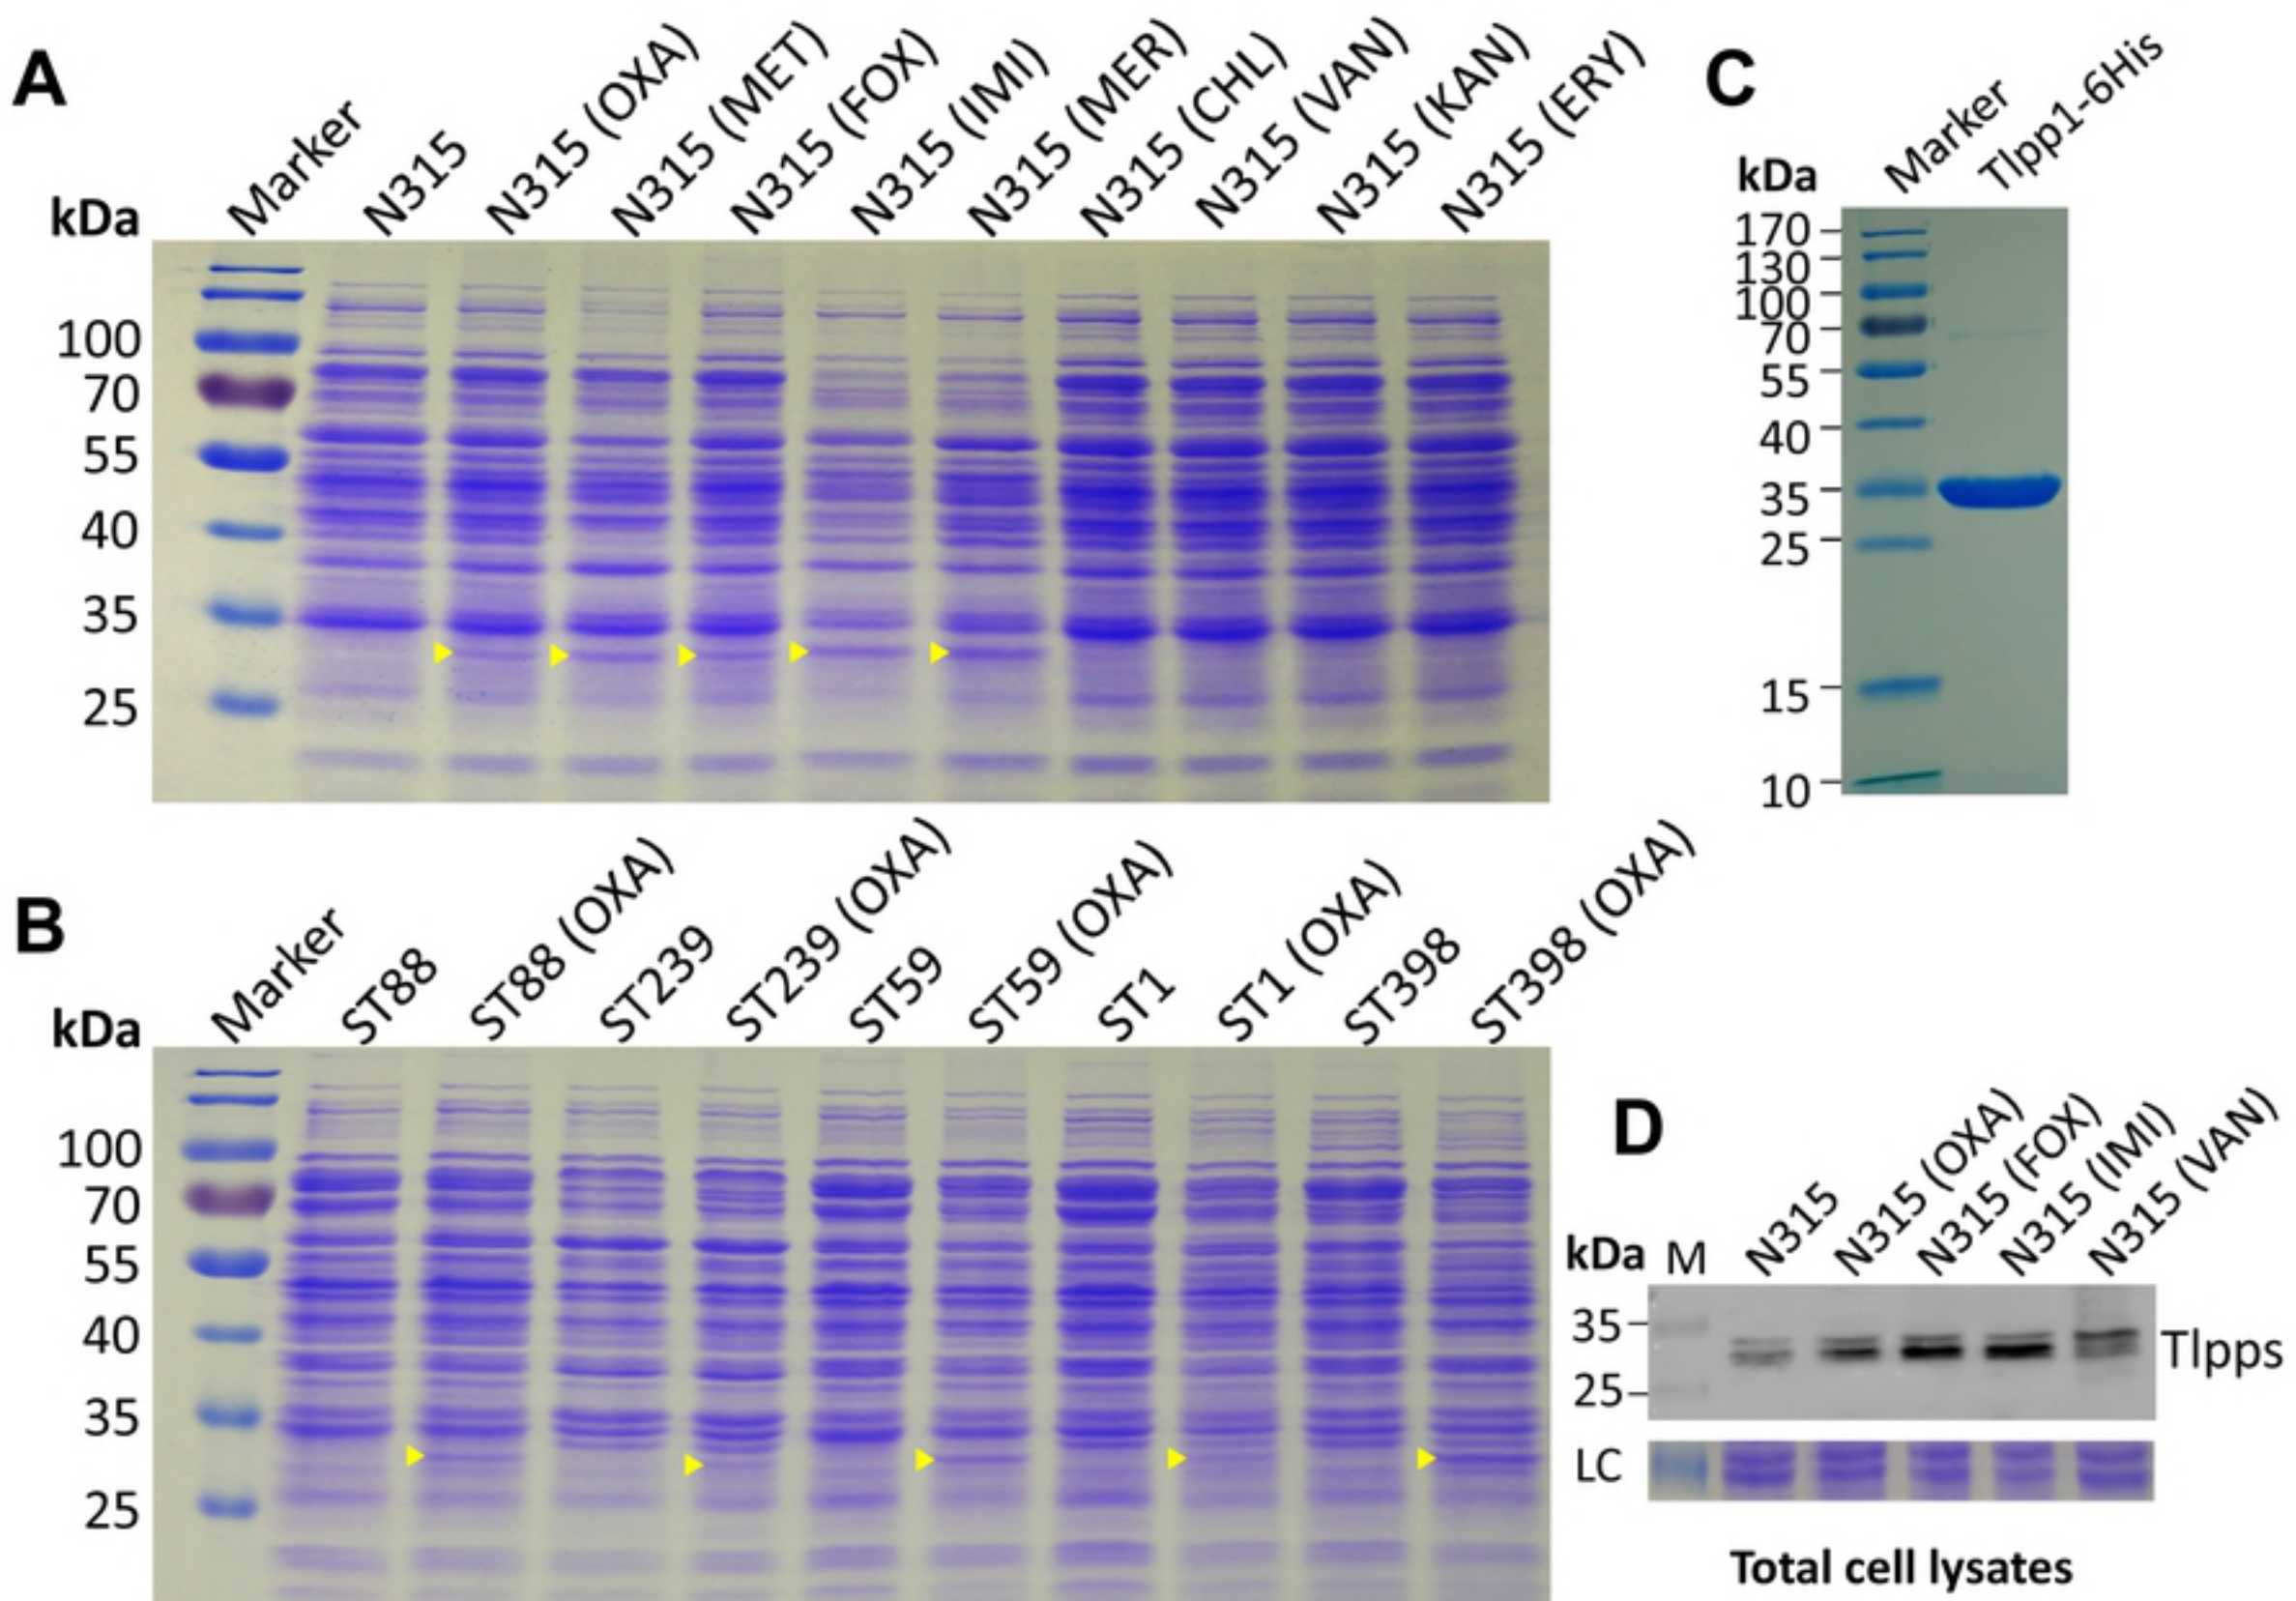



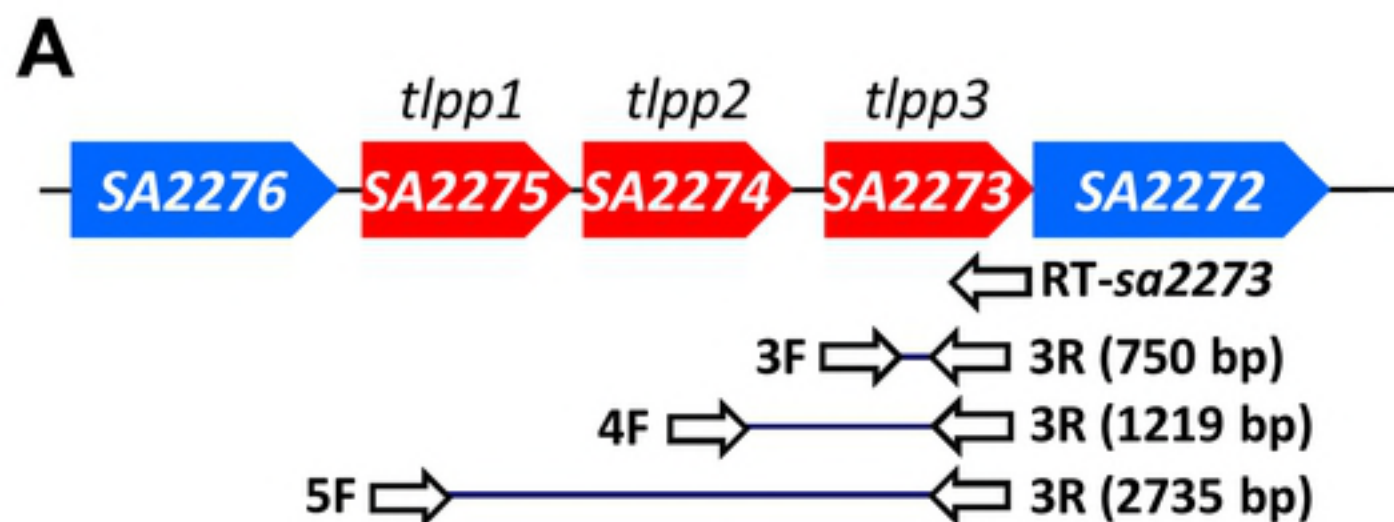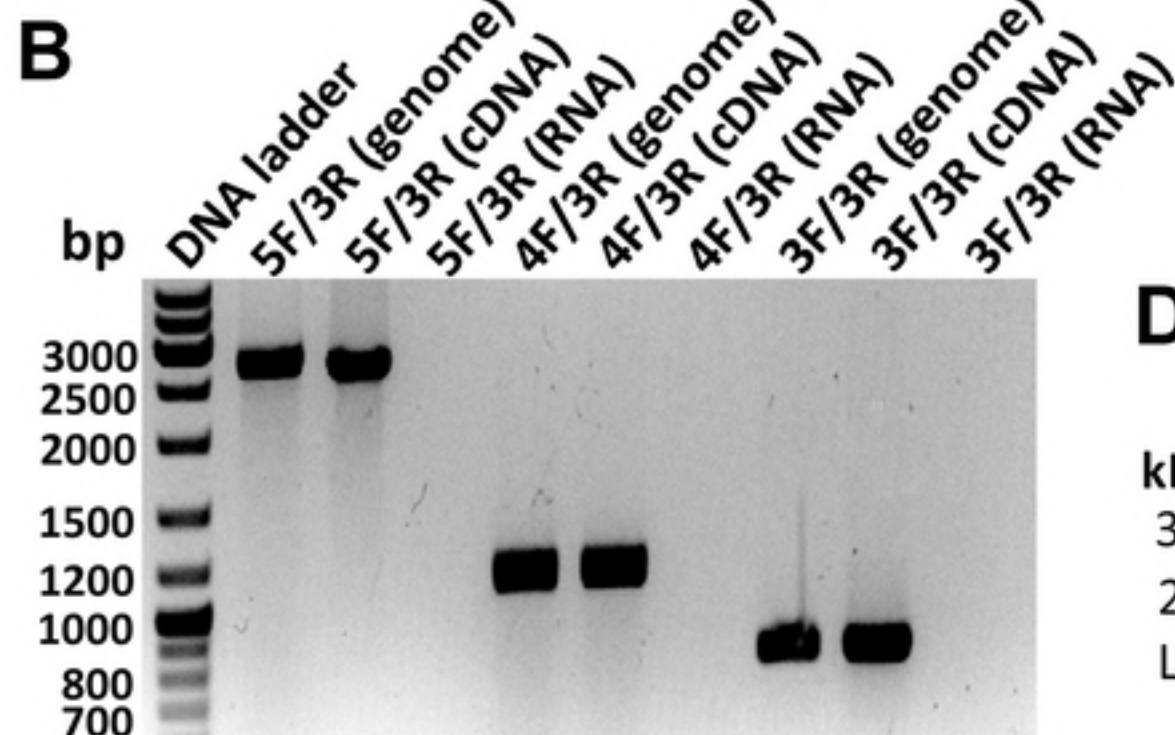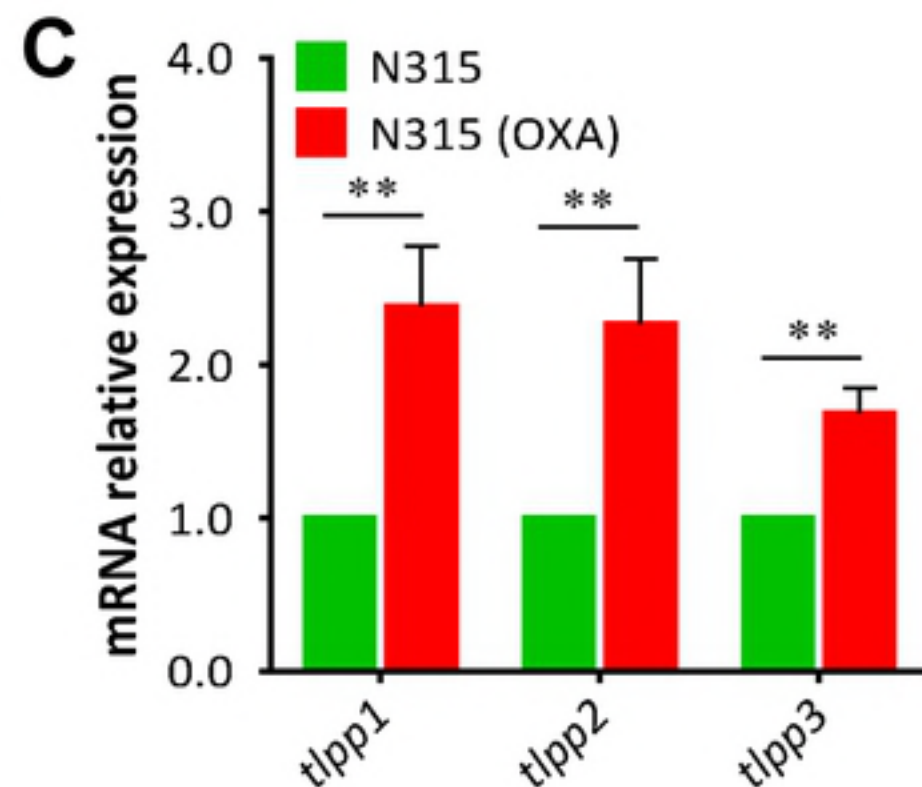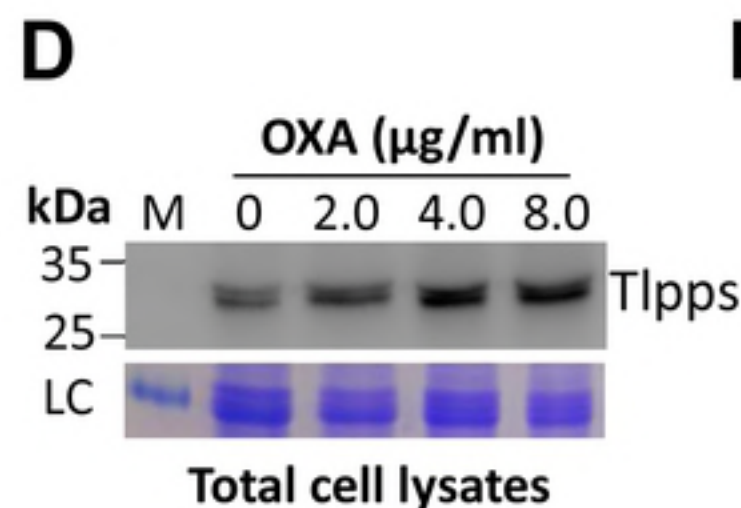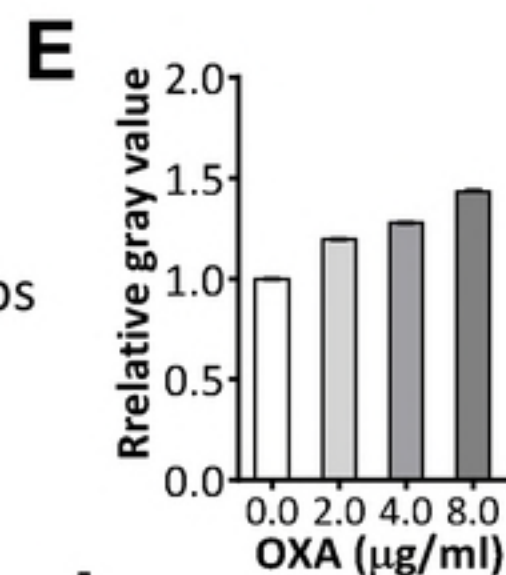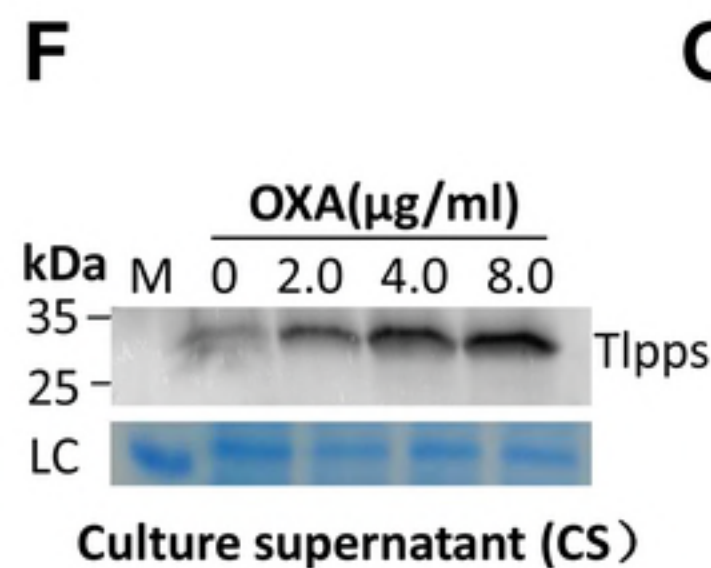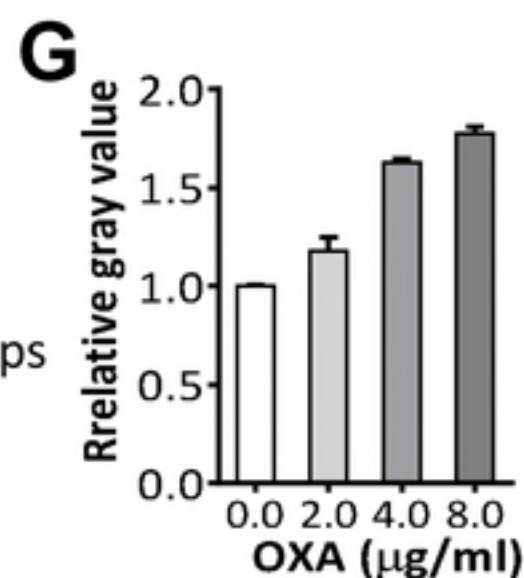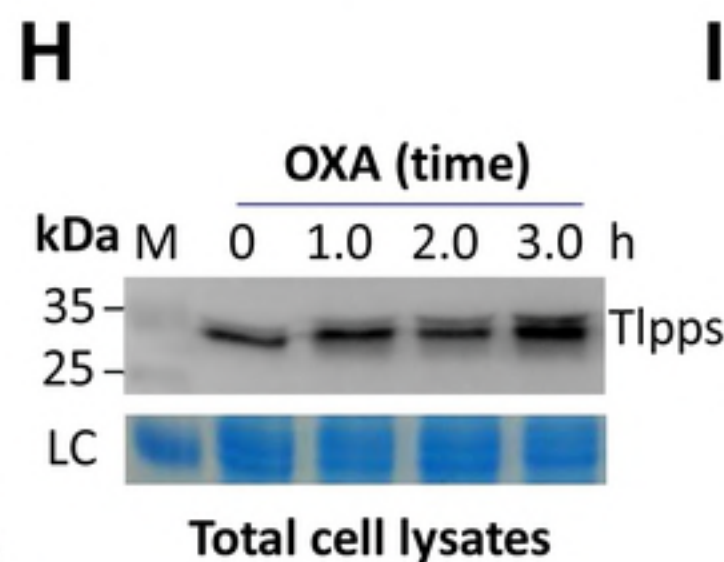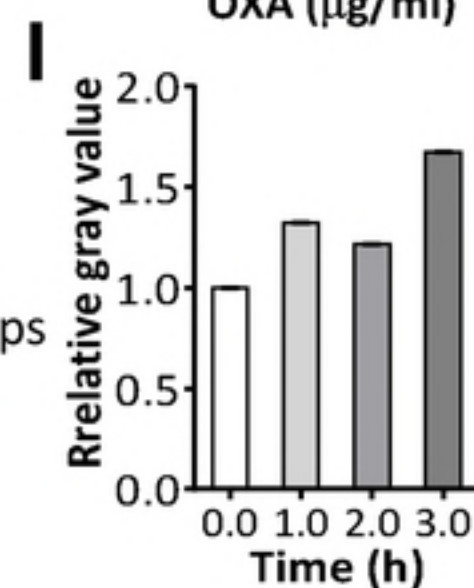

**A**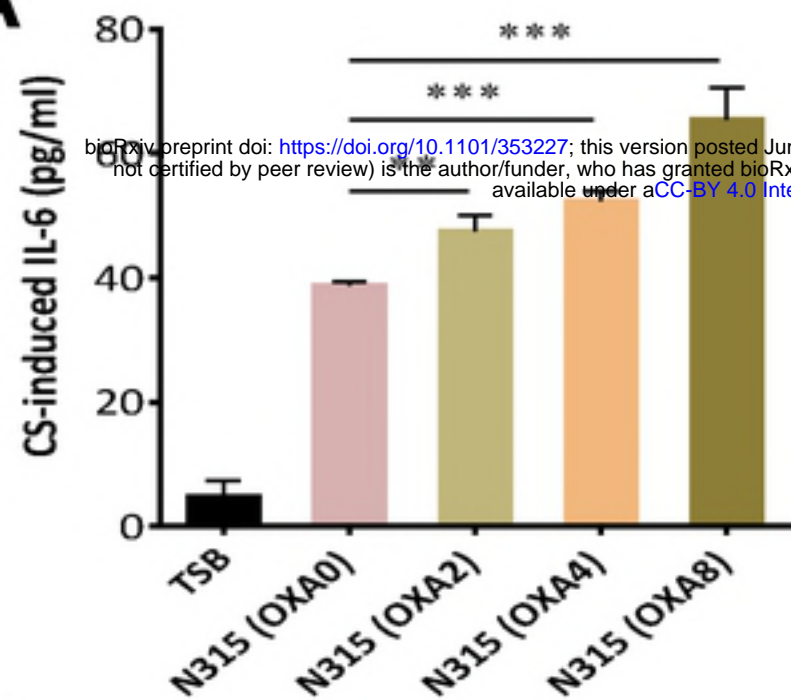**B**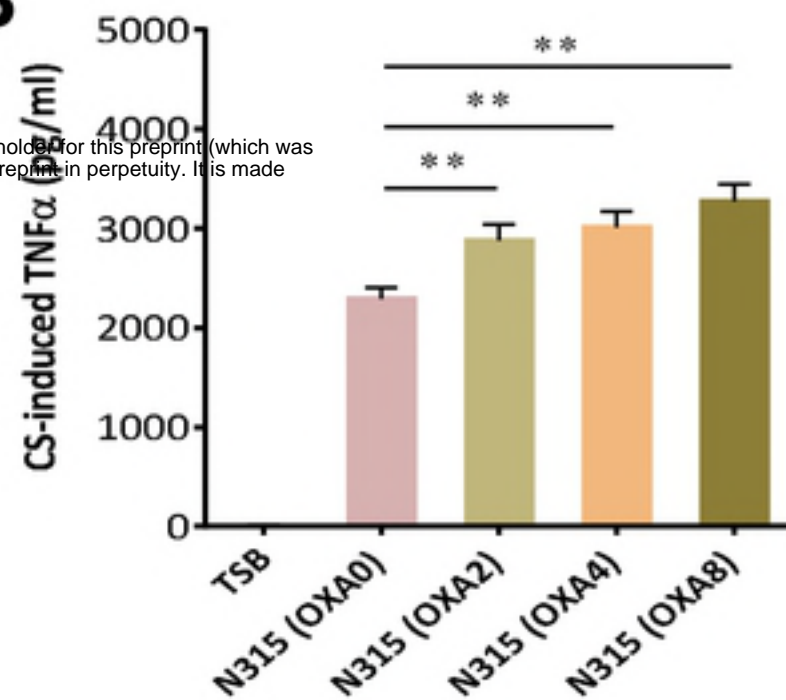**C**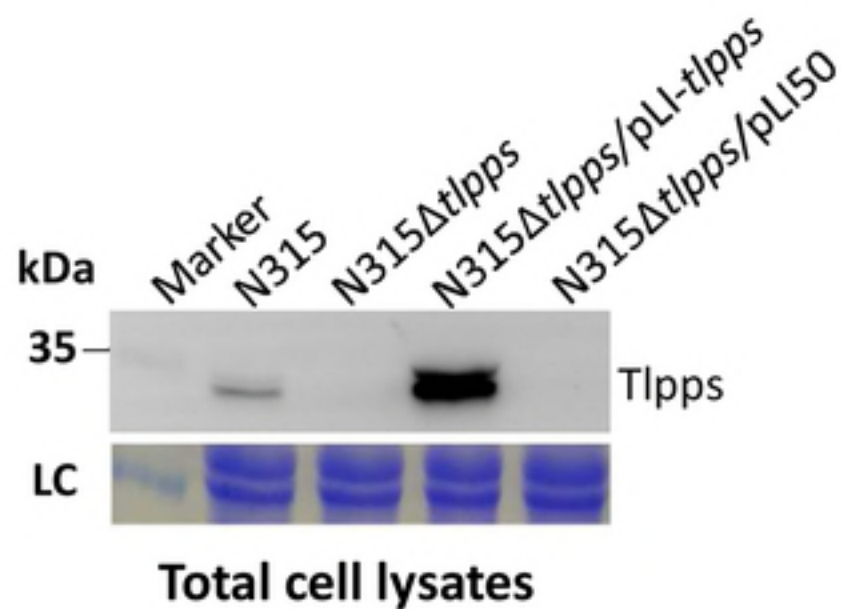**D**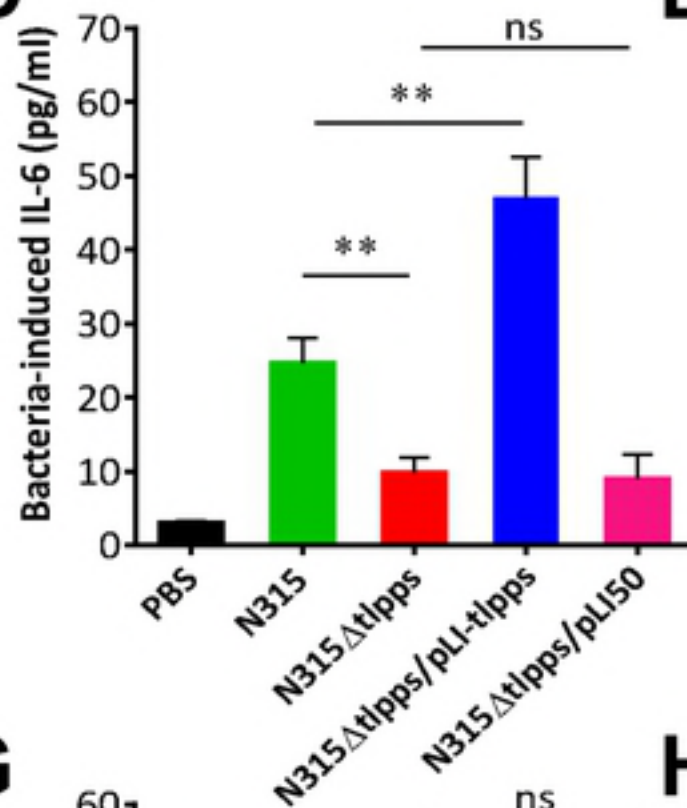**E**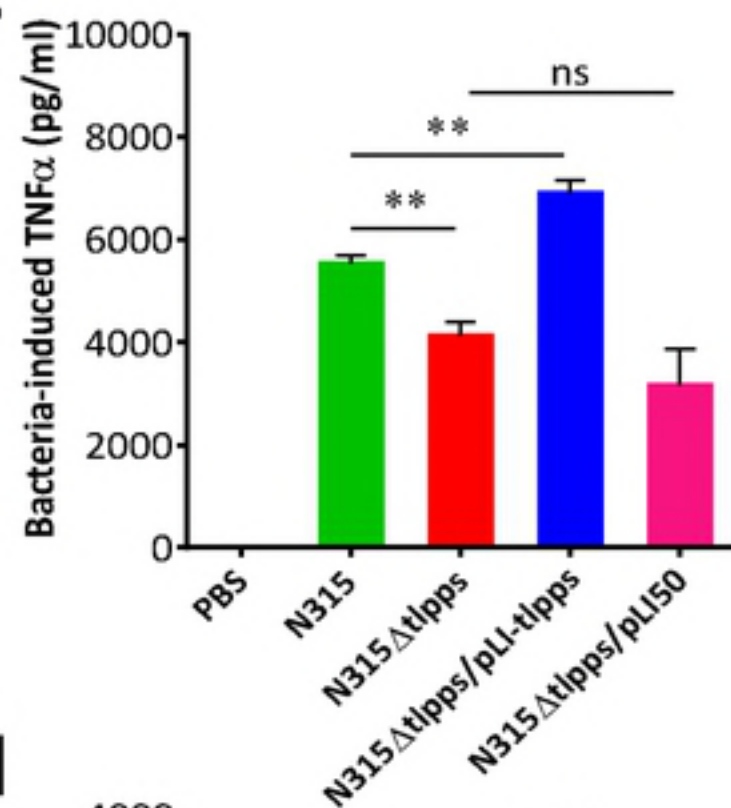**F**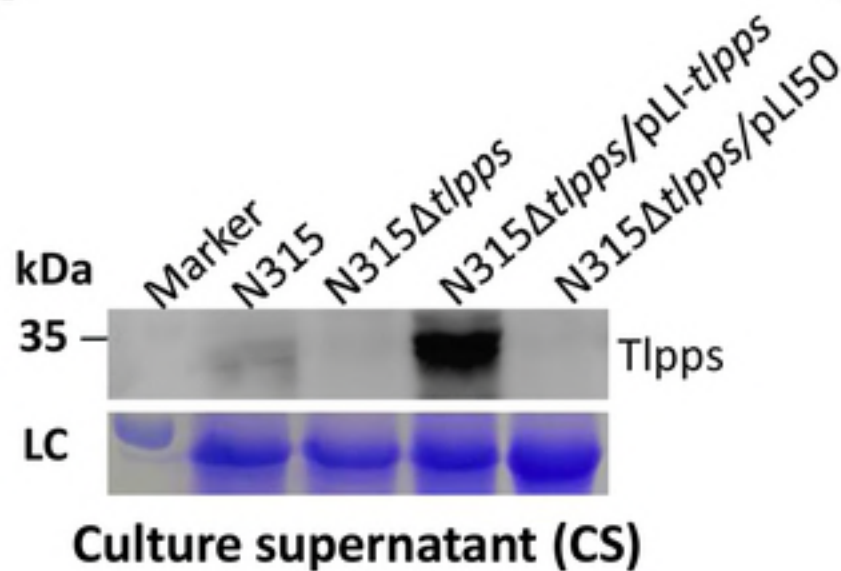**G**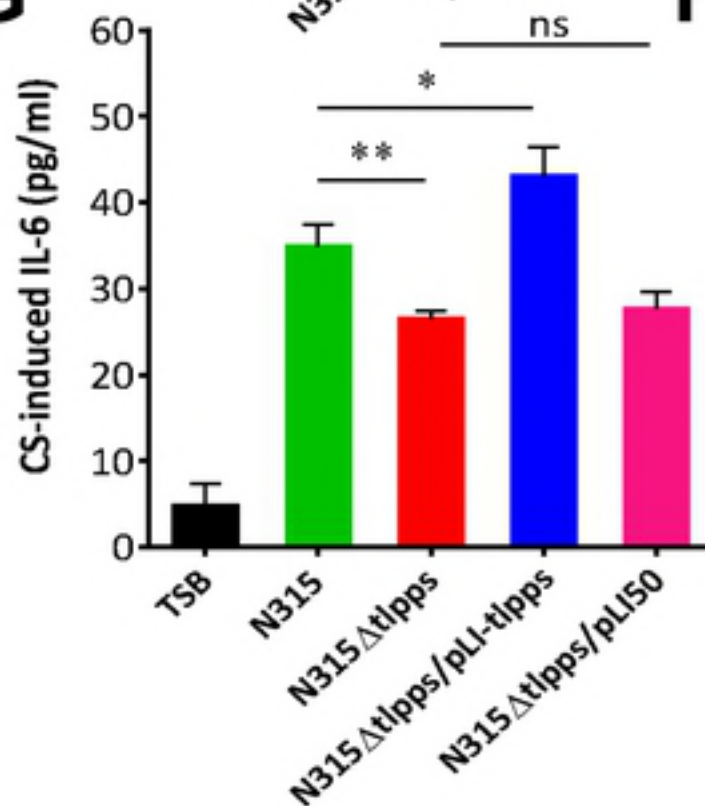**H**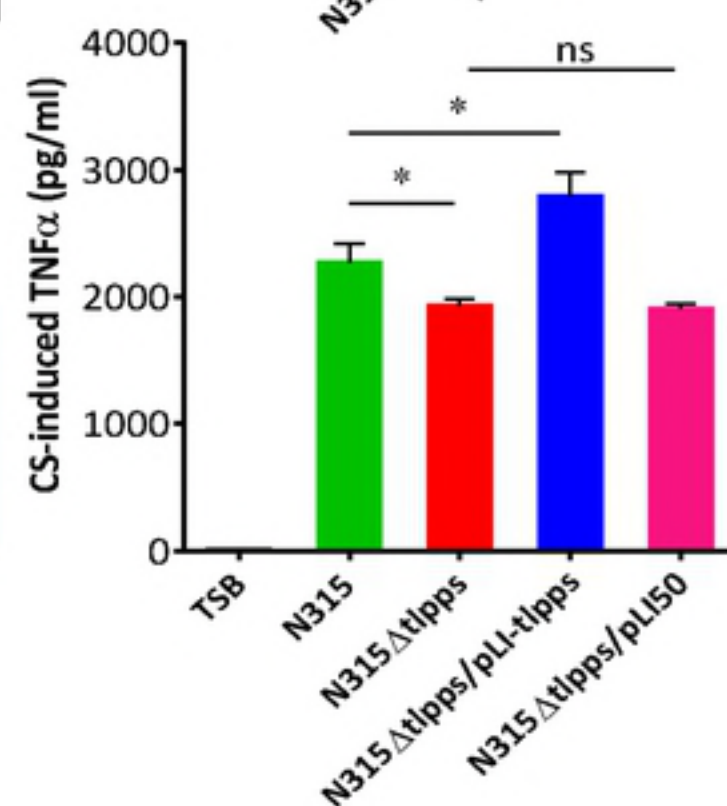



**A**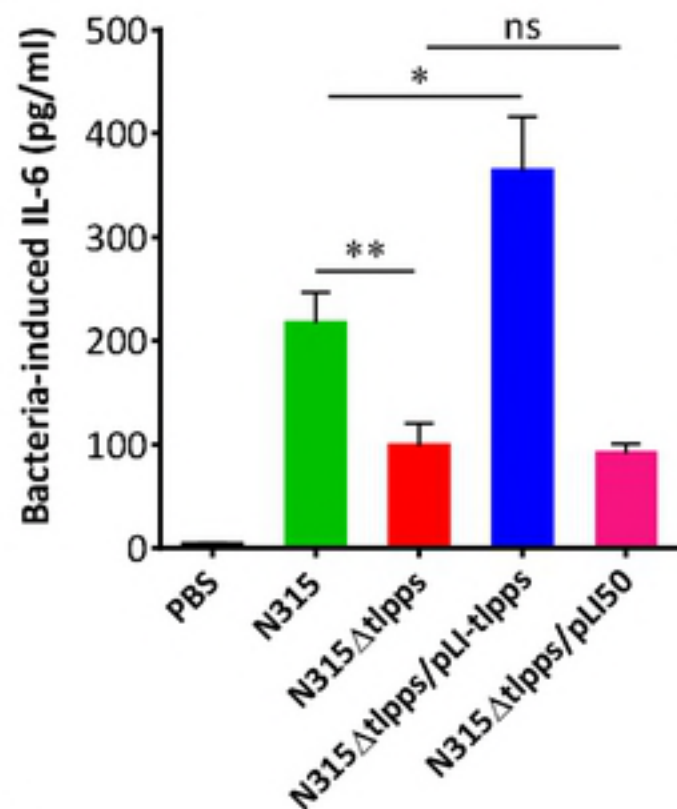**B**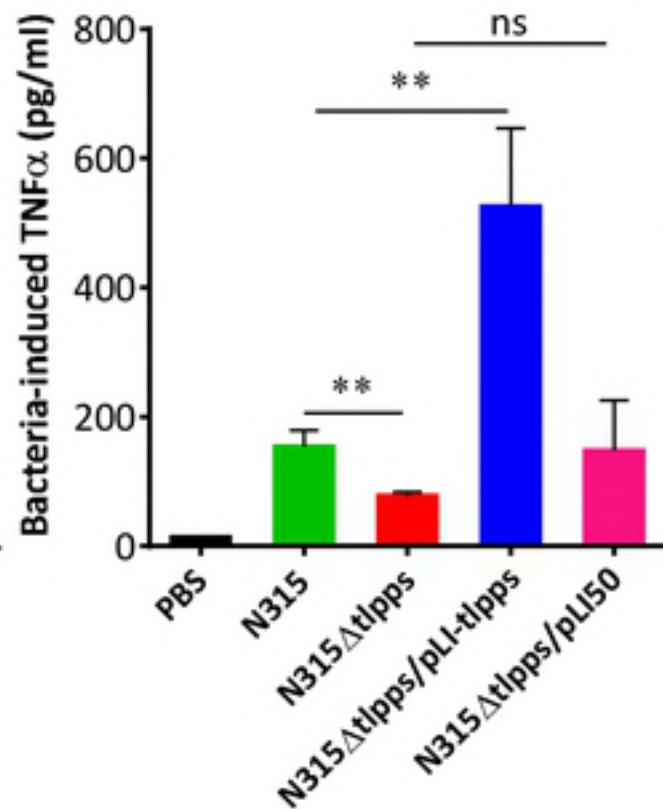**D**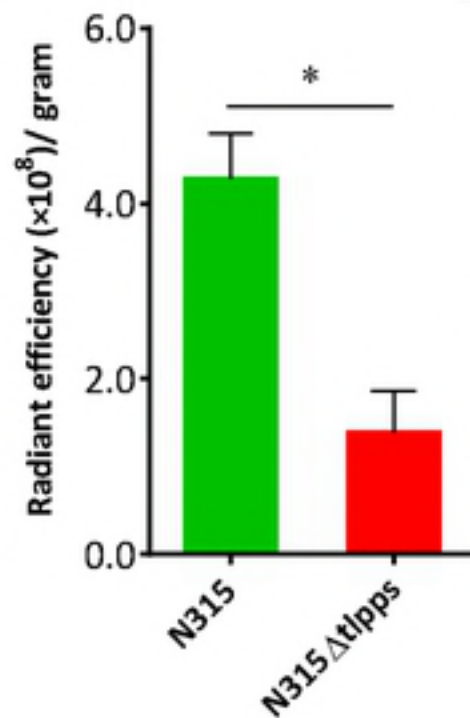**E**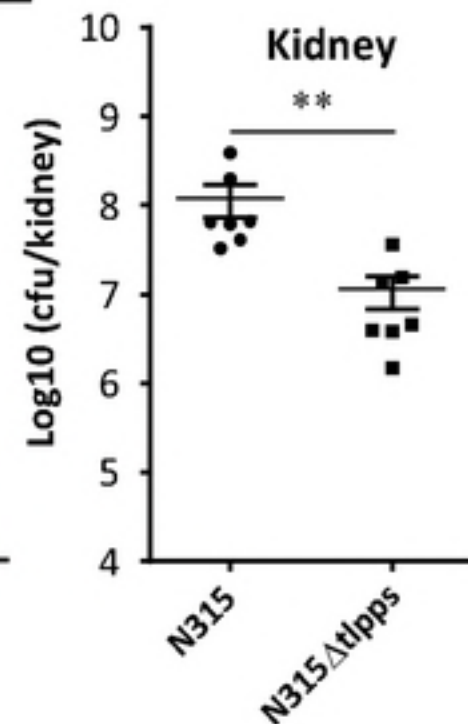**C**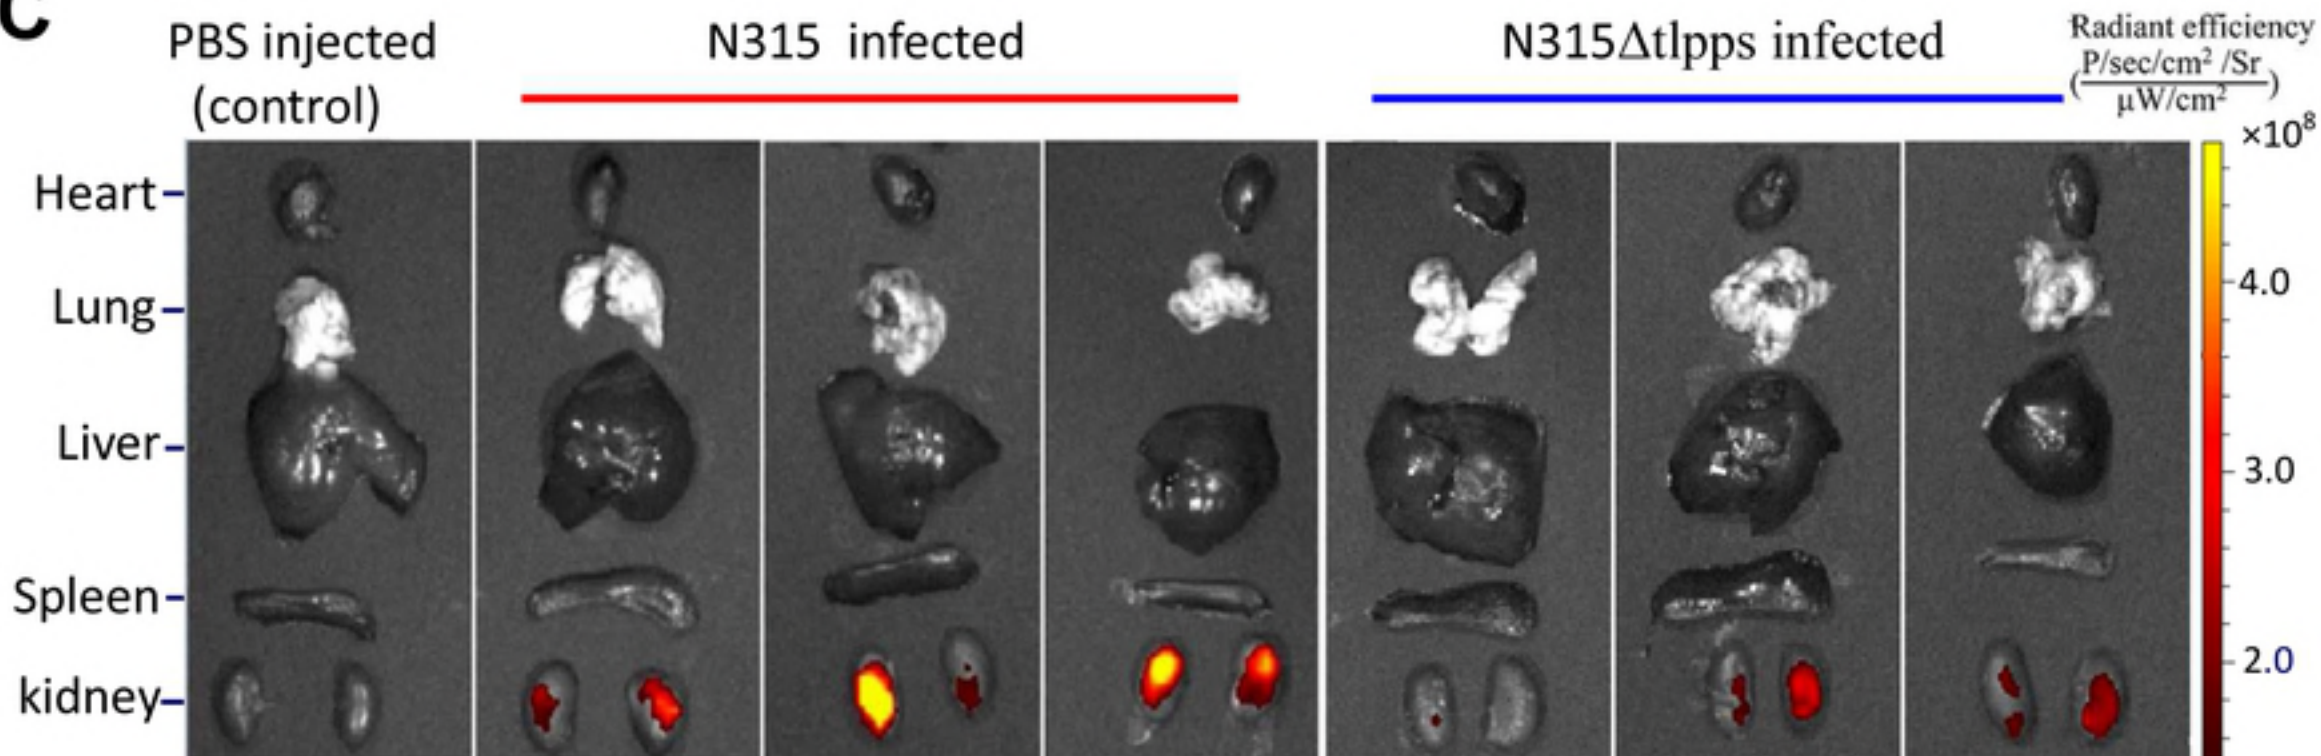



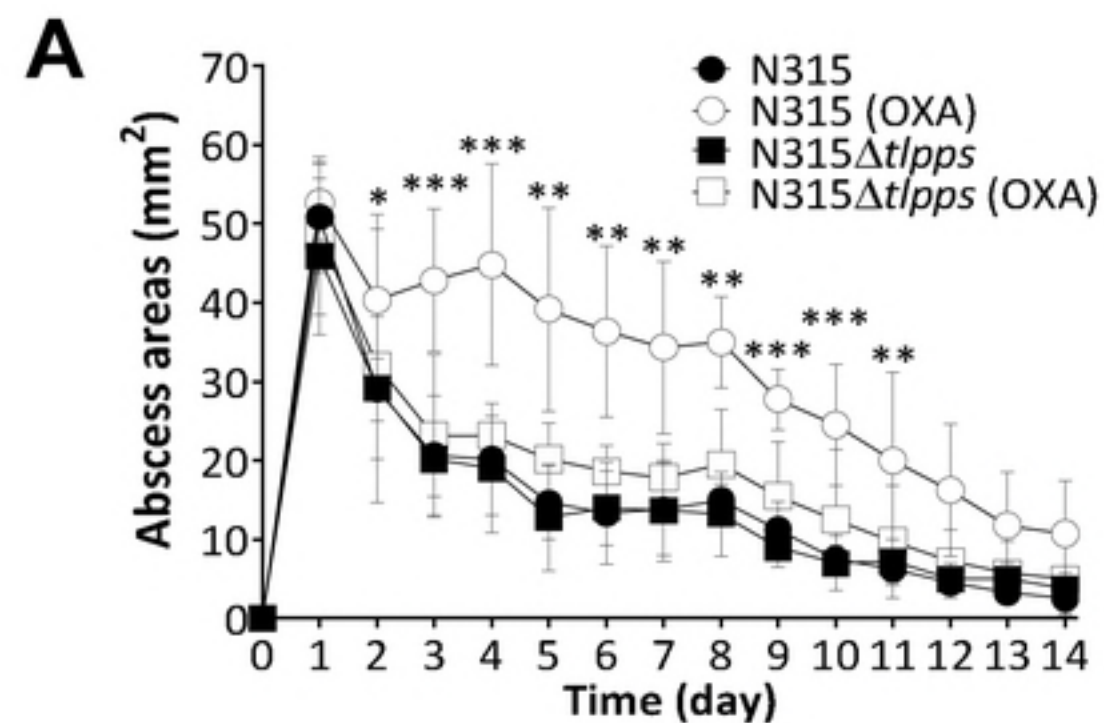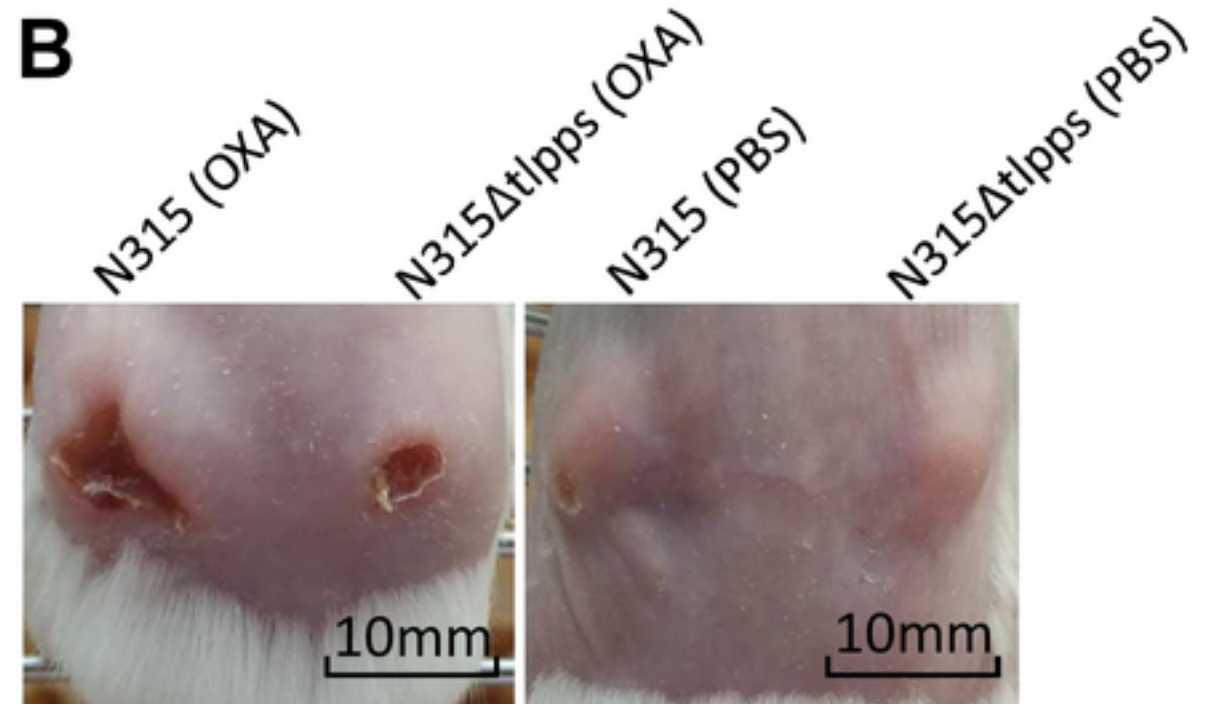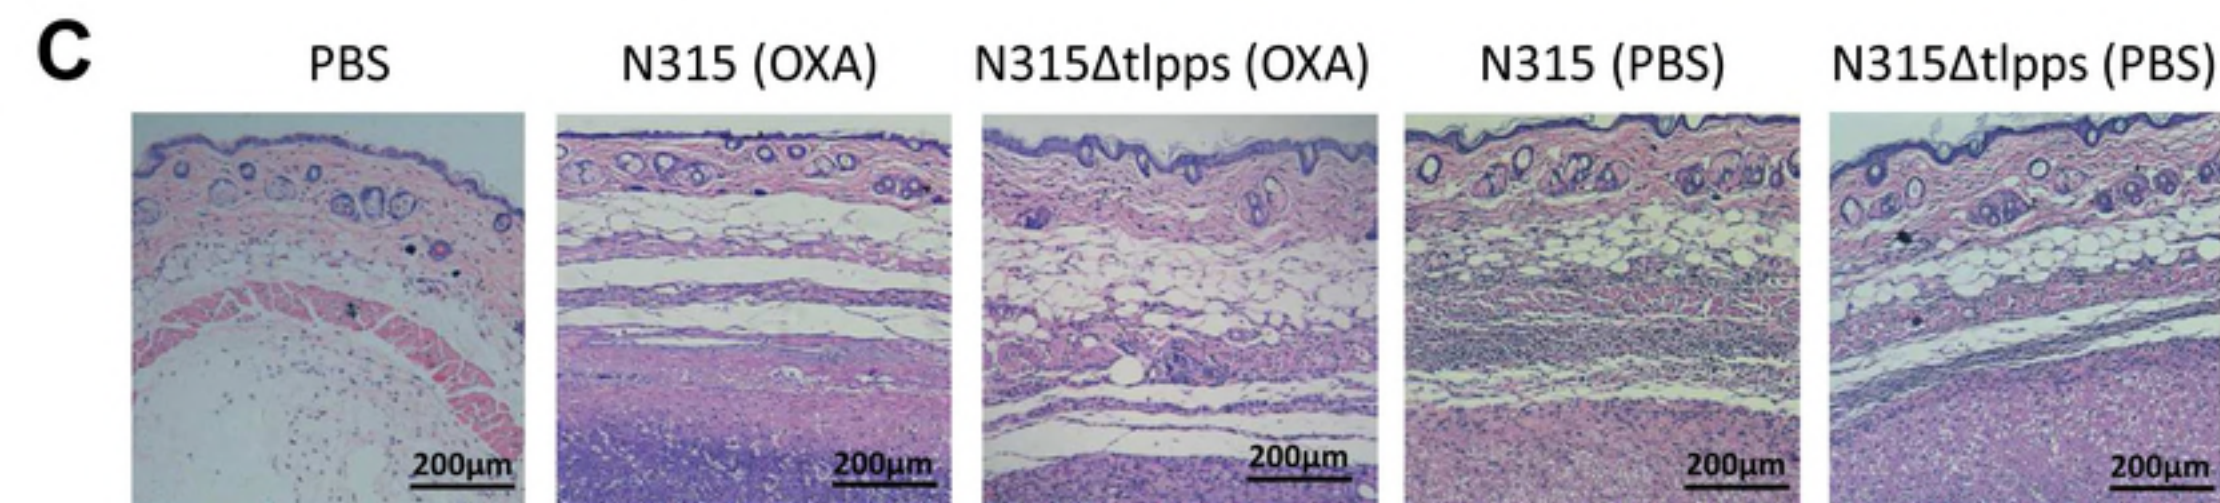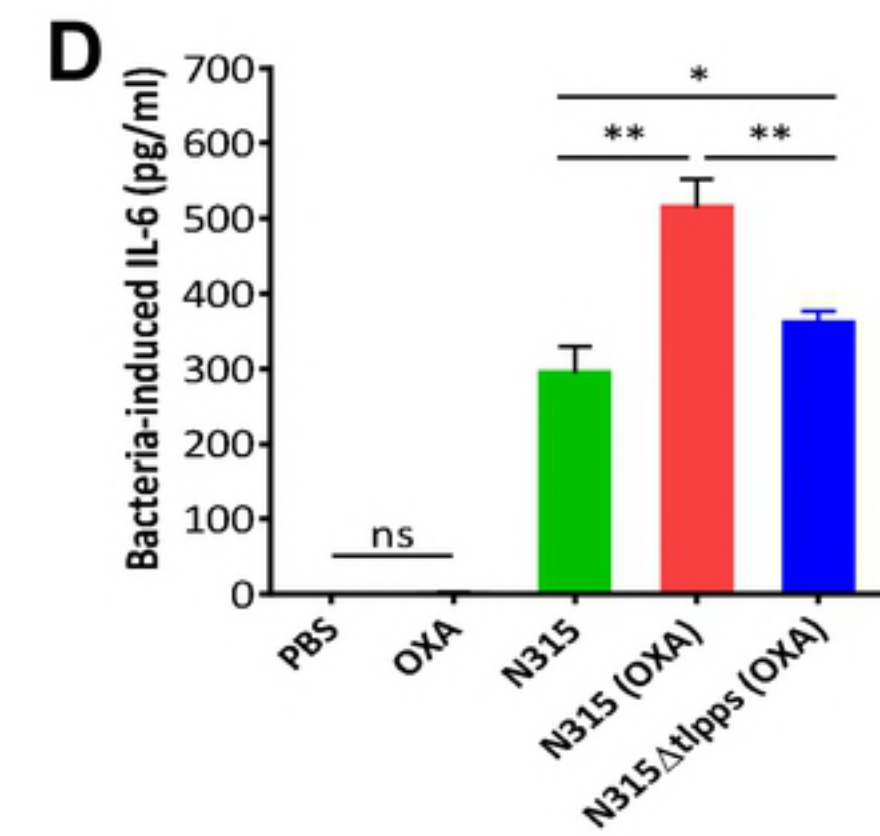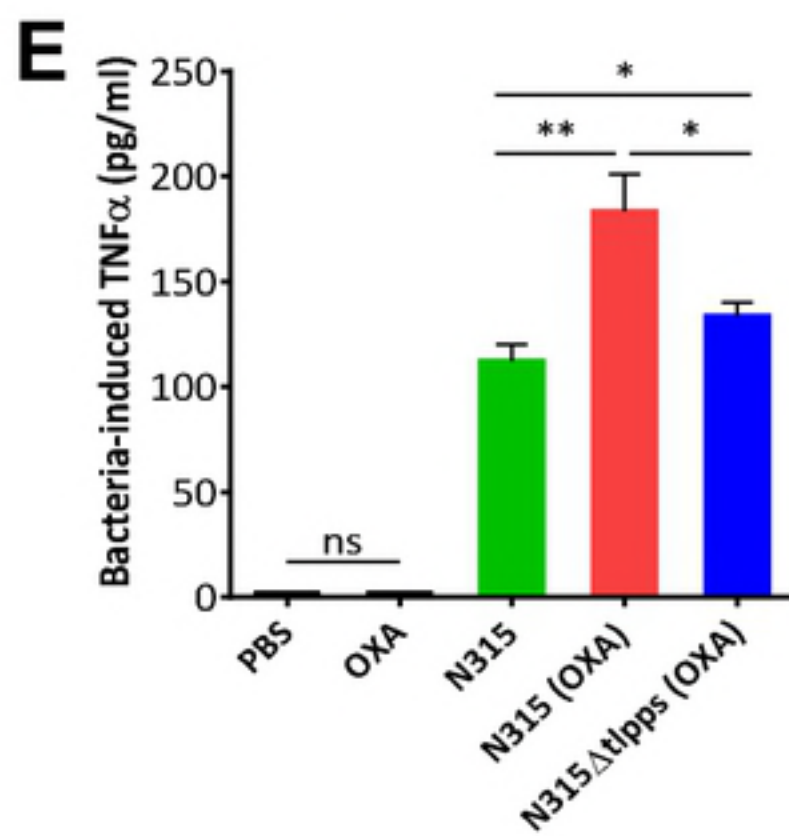

**A**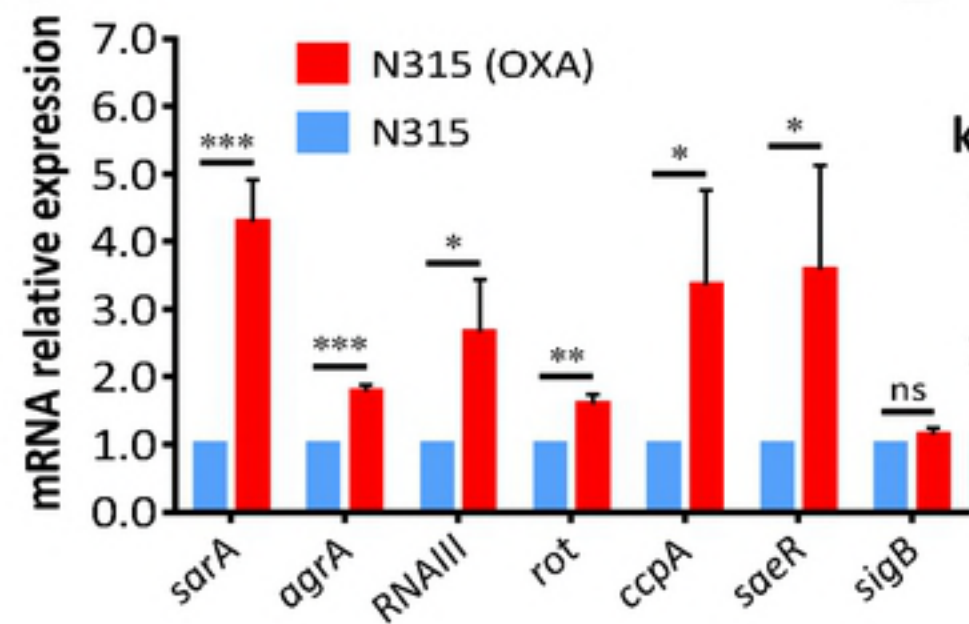**B**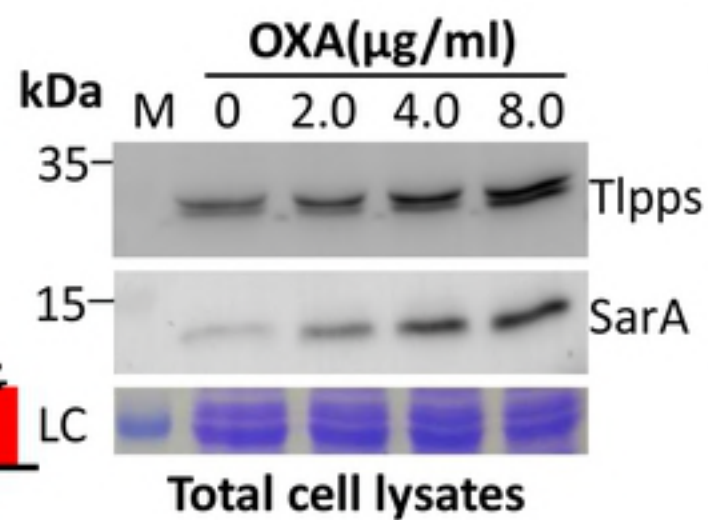**C**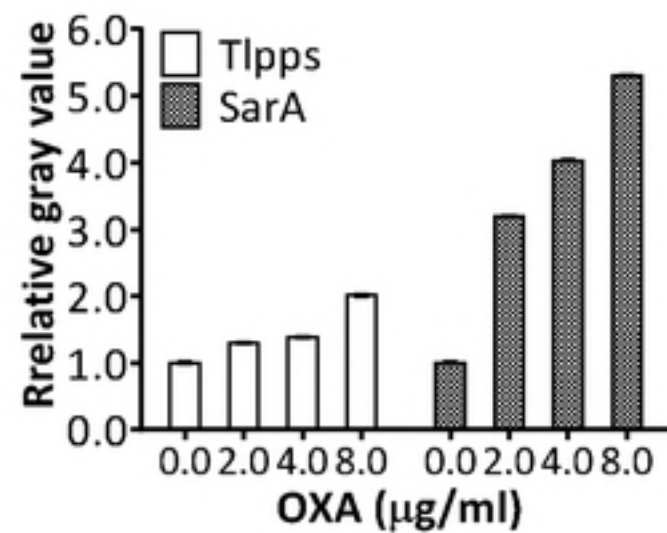**D**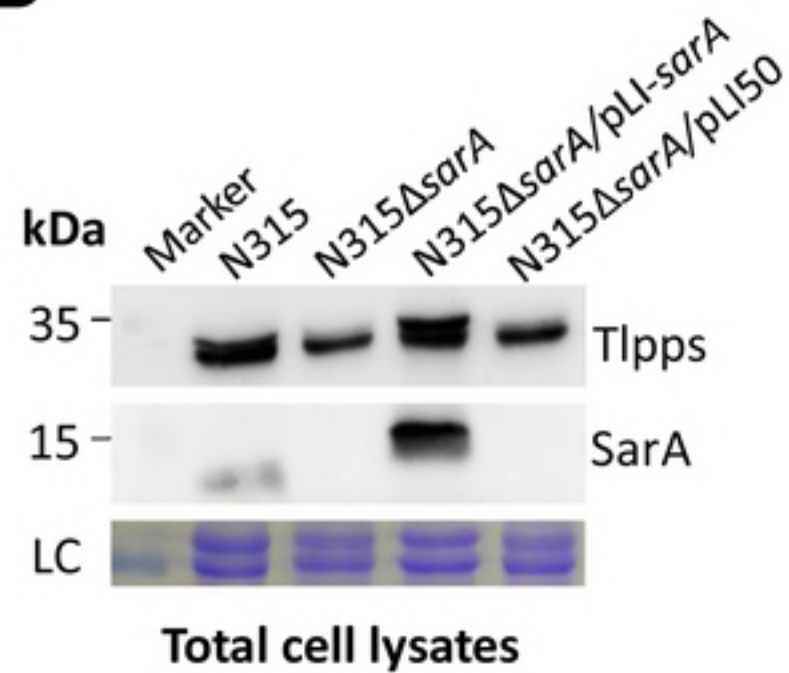**E**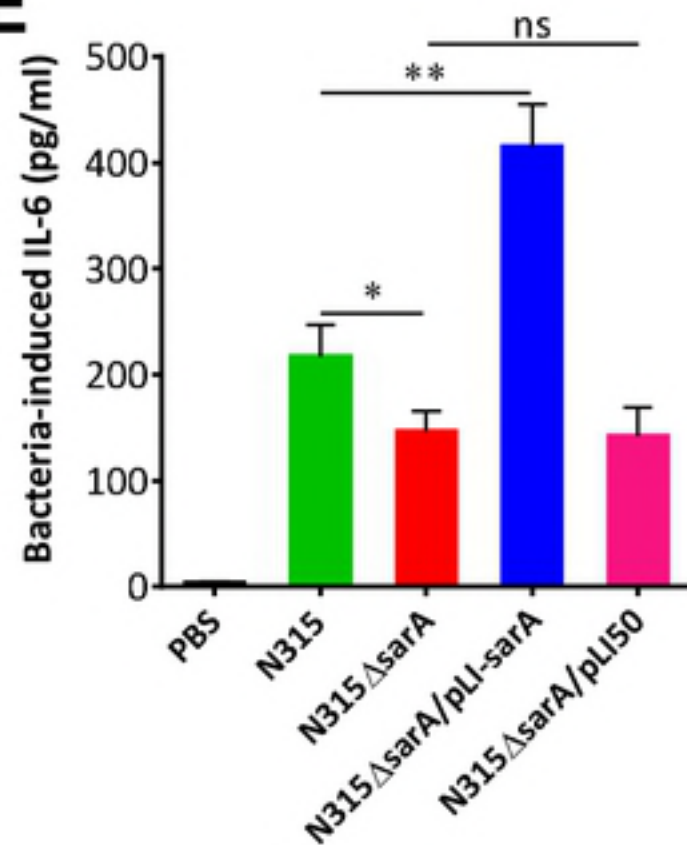**F**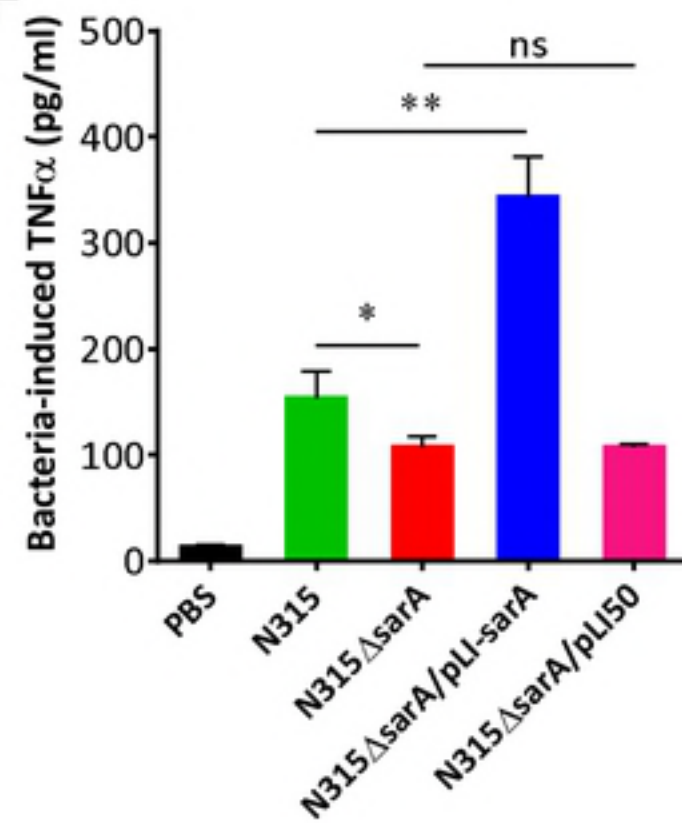



**A**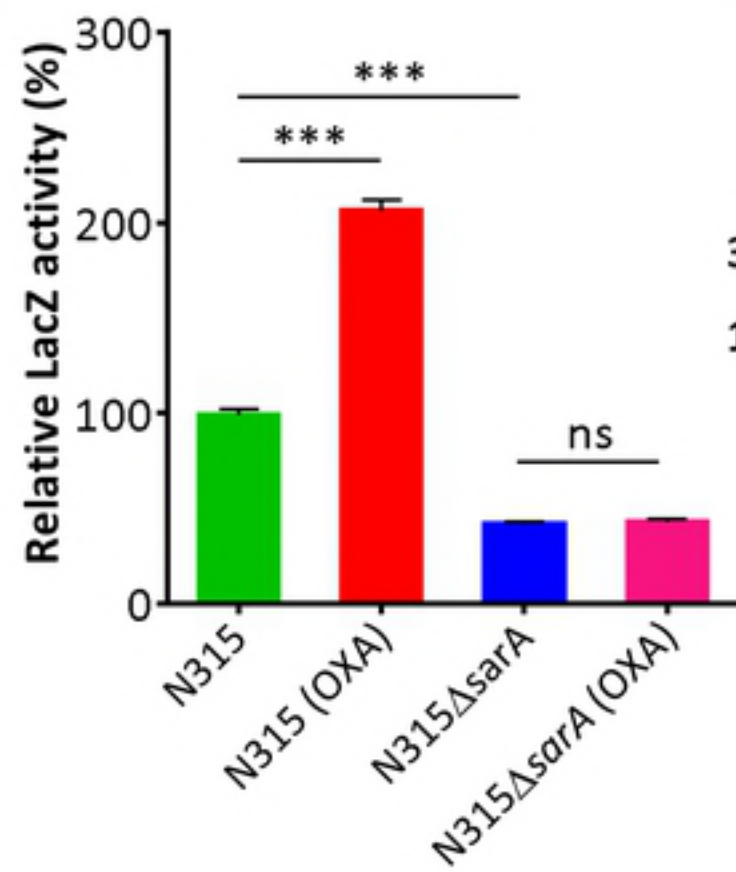**B**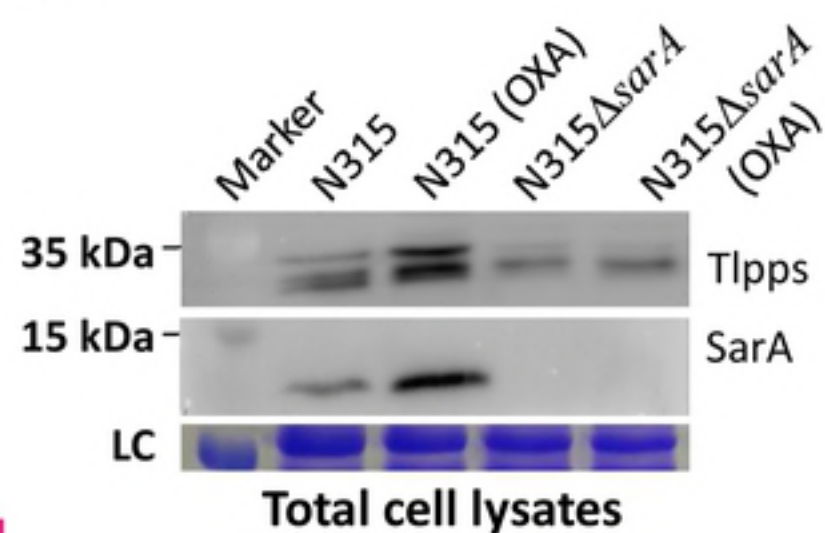**C**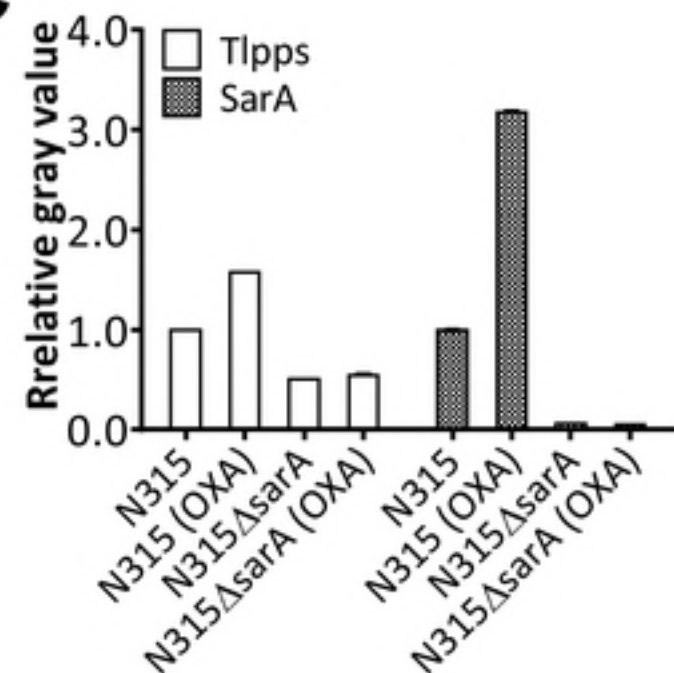**D**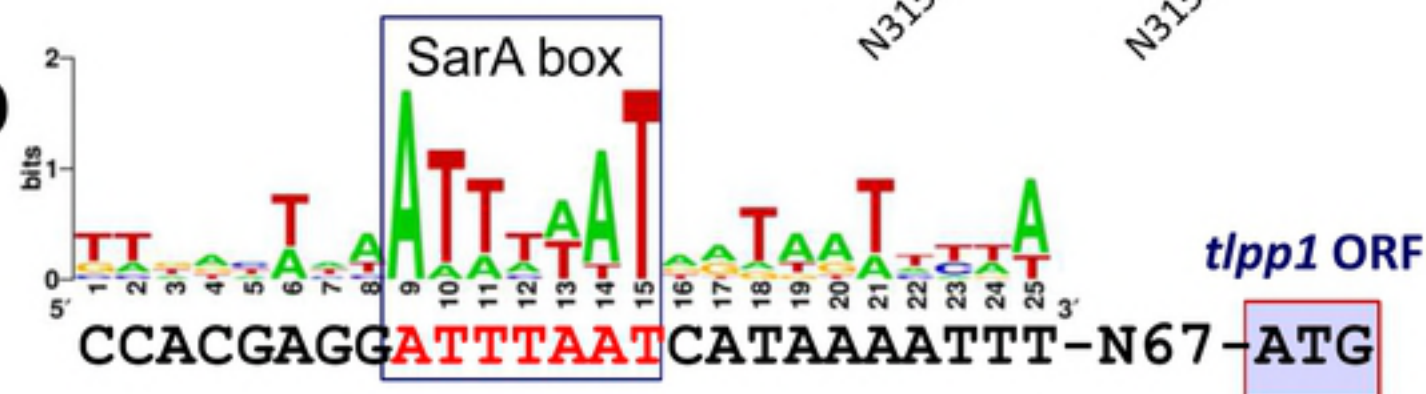**E**

*tlpps*-P: CCACGAGG**ATTTAAT**CATAAAATTTCTCTAGTATTATTAATATTGGAATTT-N40-ATG

*tlpps*-PM: CCACGAGG**GGGGGGG**CATAAAATTTCTCTAGTATTATTAATATTGGAATTT-N40-ATG

**F**

SarA(pM)

0 40 80 120 160 200 240

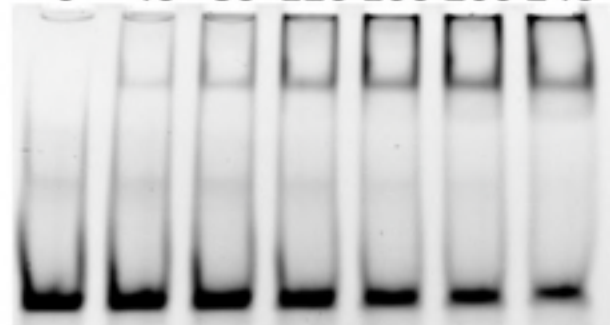**G**

SarA(pM)

0 40 80 120 160 200 240

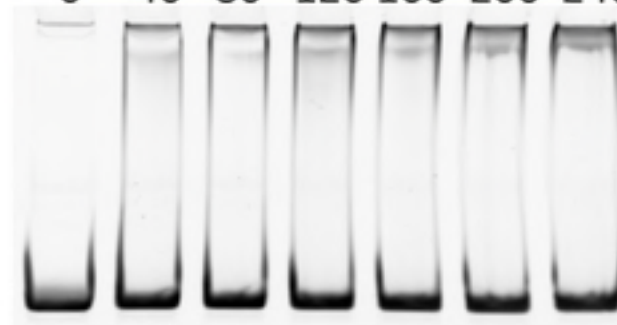**H**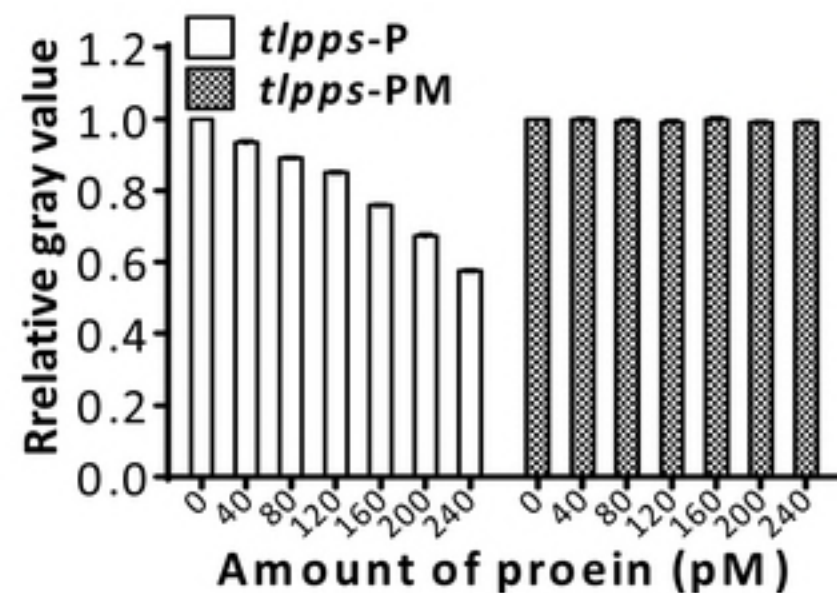

Silencing inflammatory responses, promoting  
*S. aureus* colonization and abscess-formation

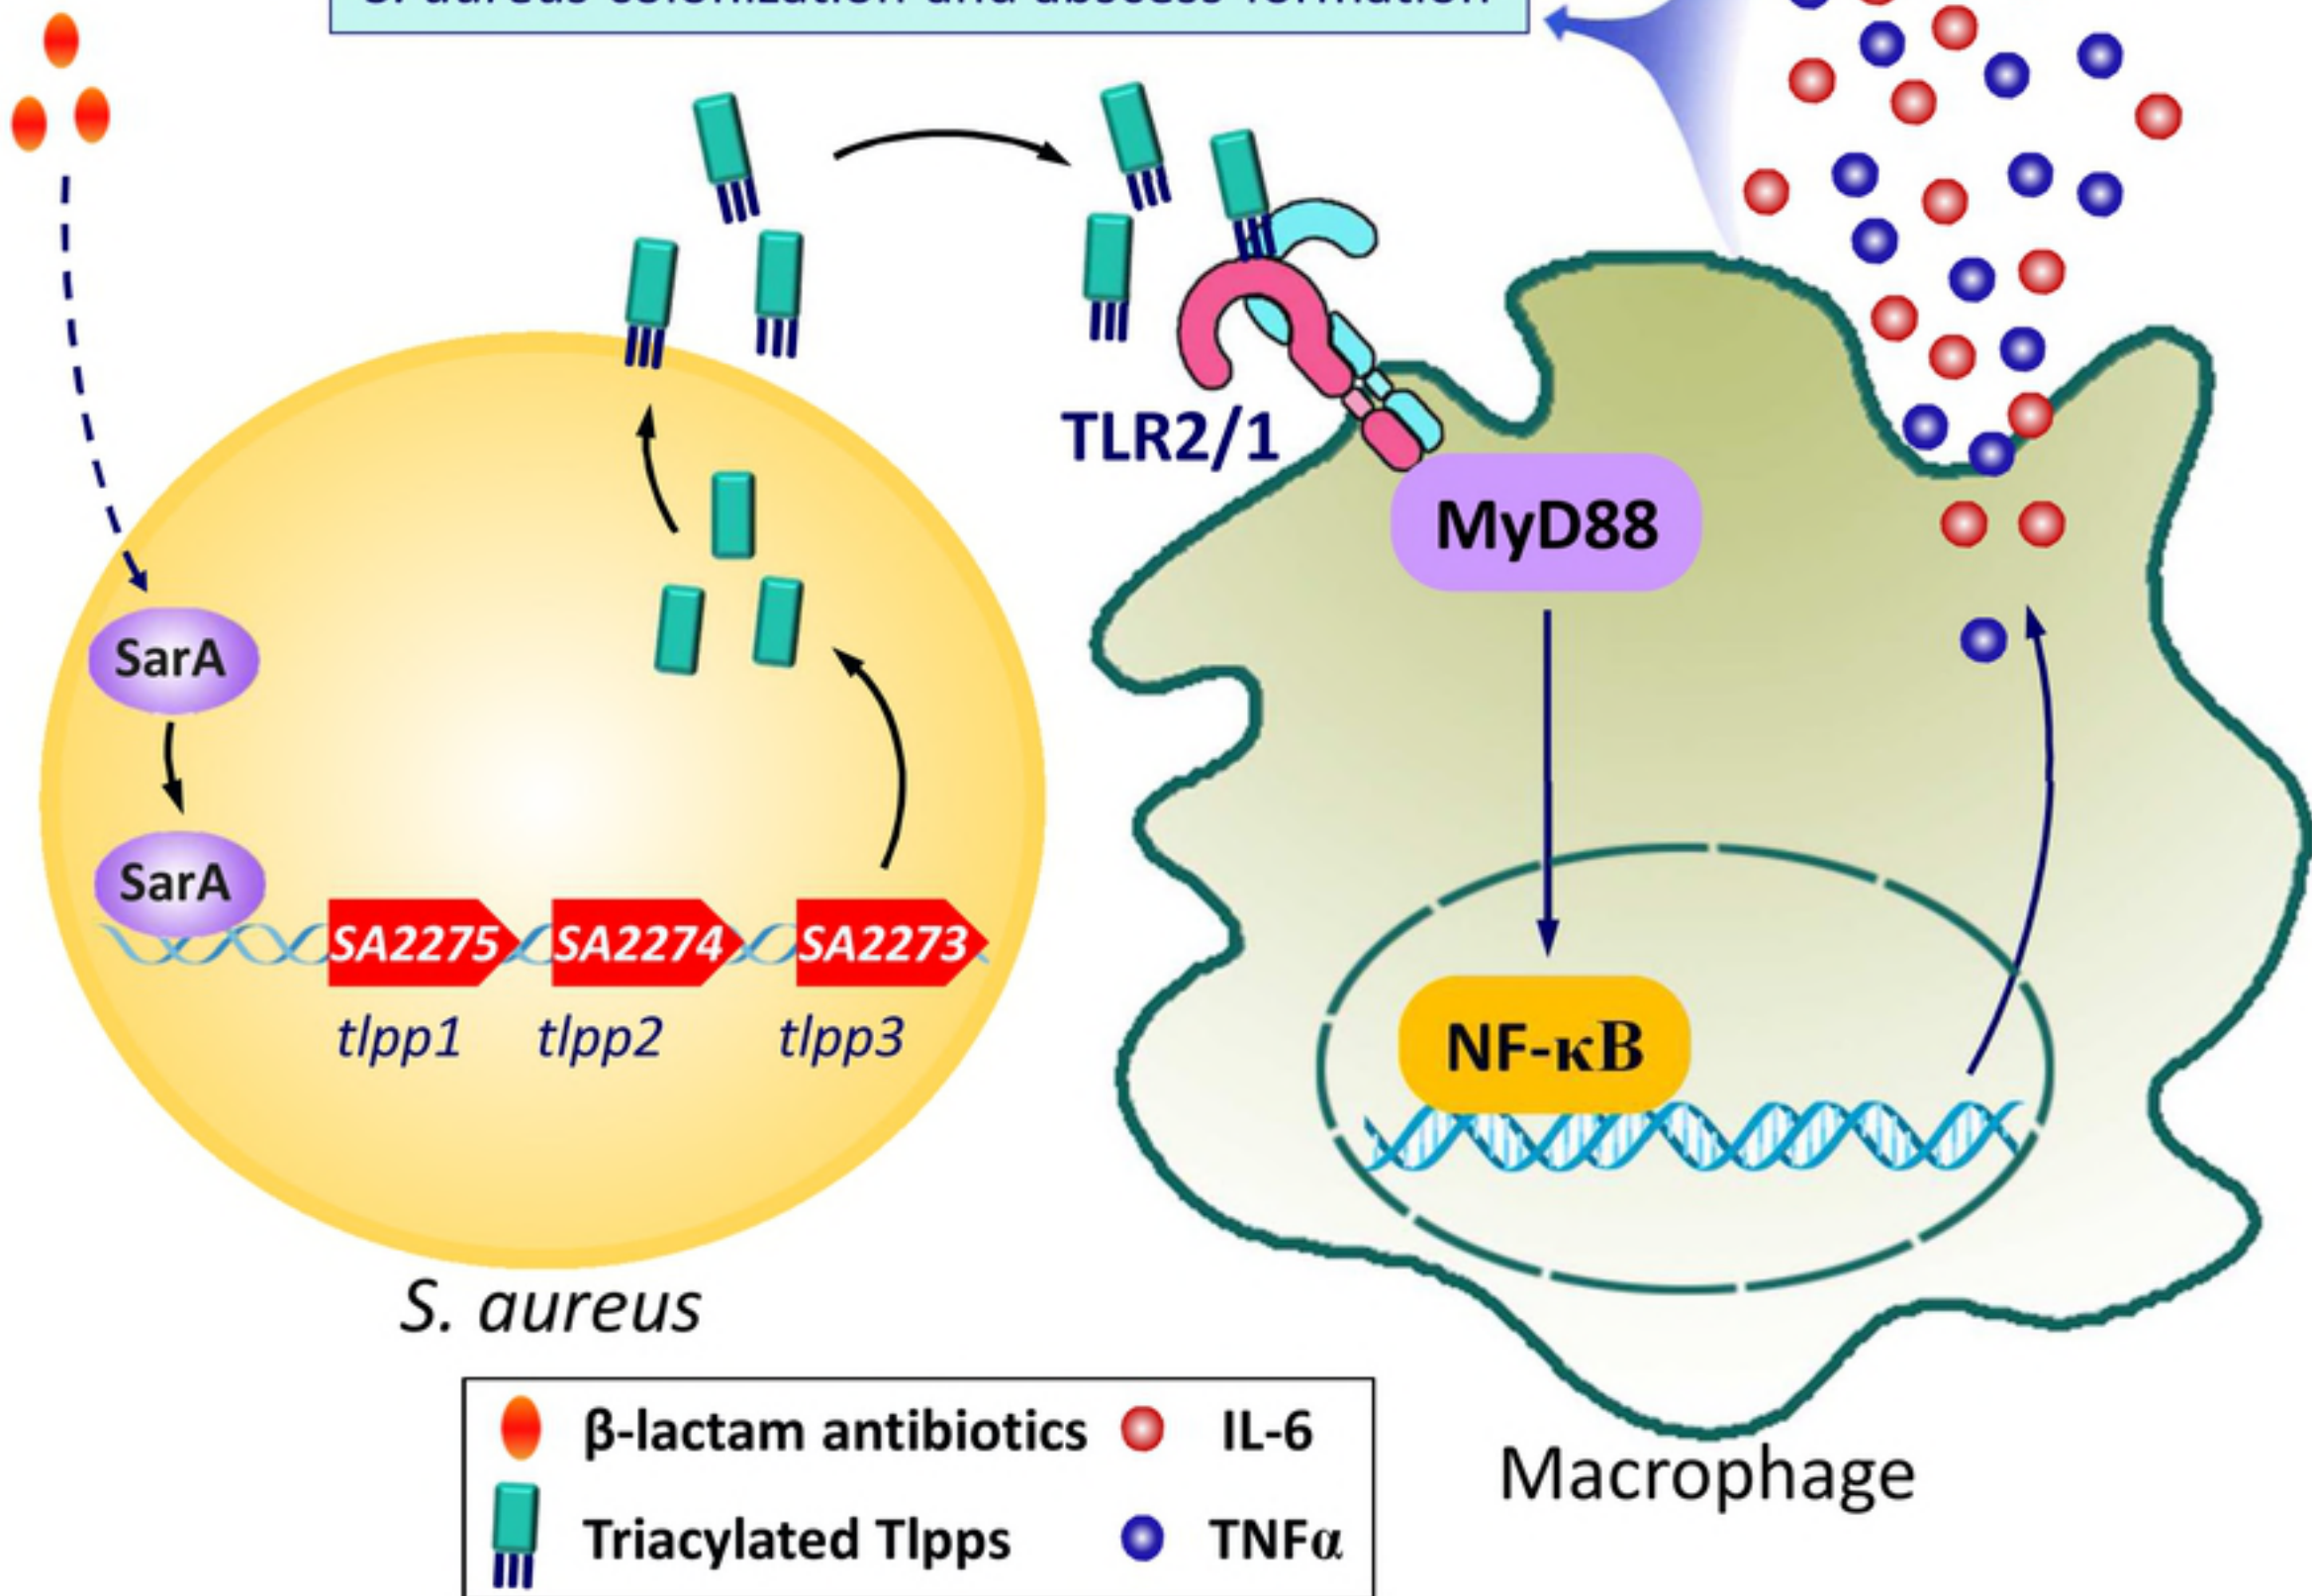



**A**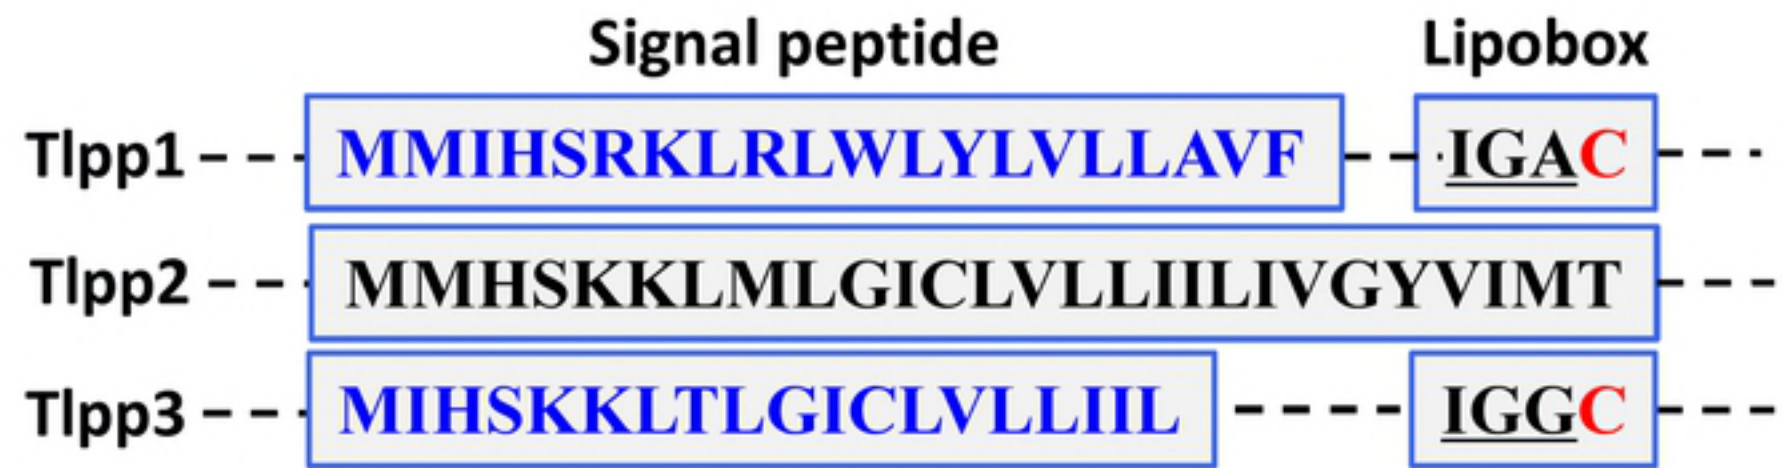**B**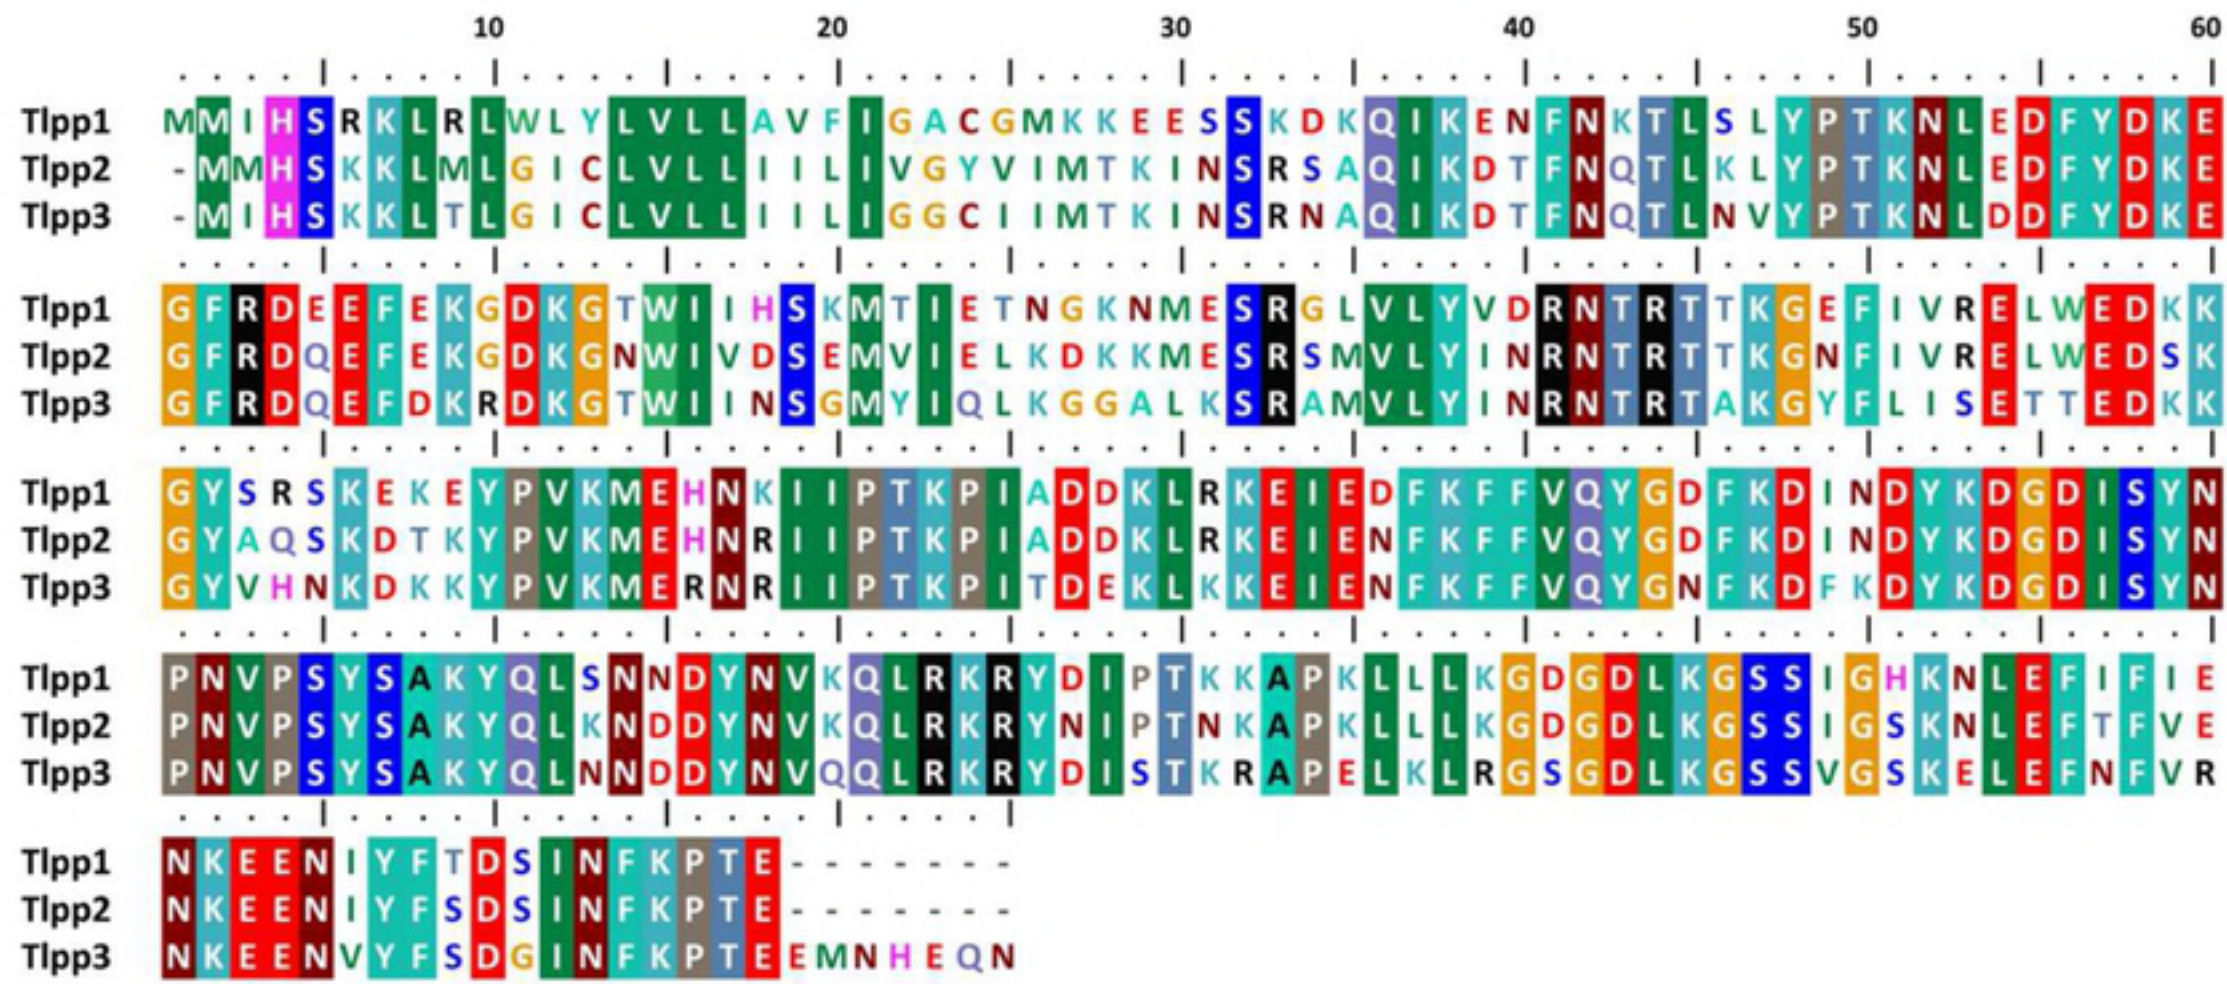

**A**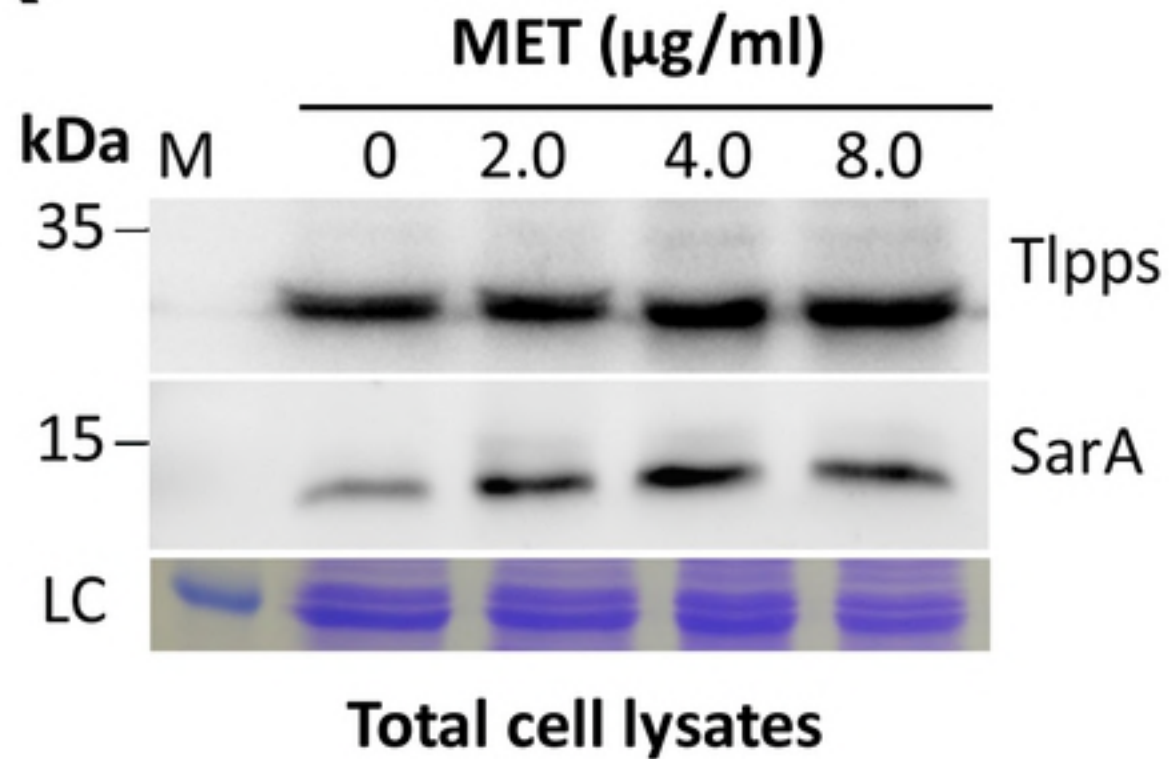**B**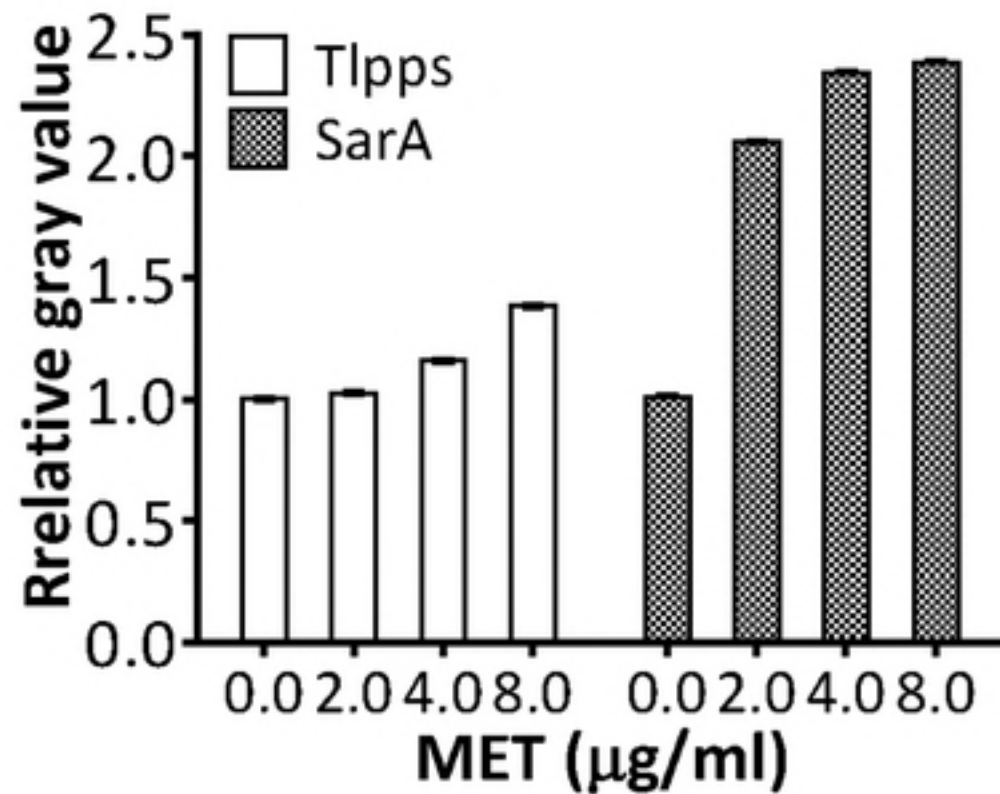



**A**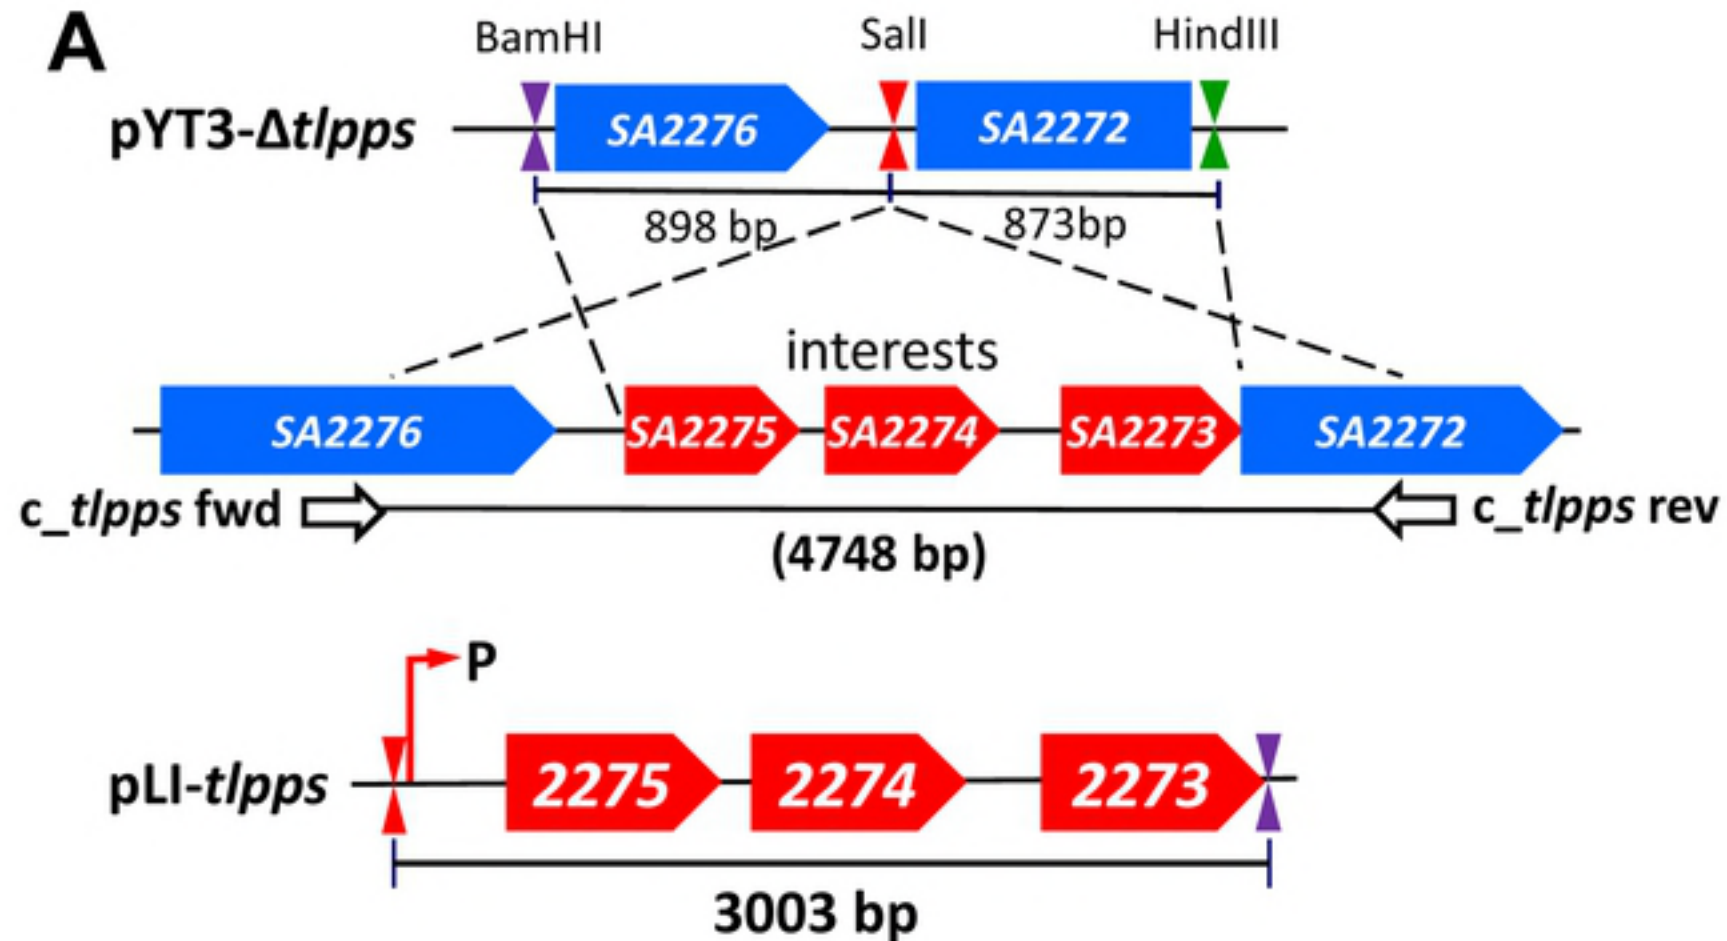**B**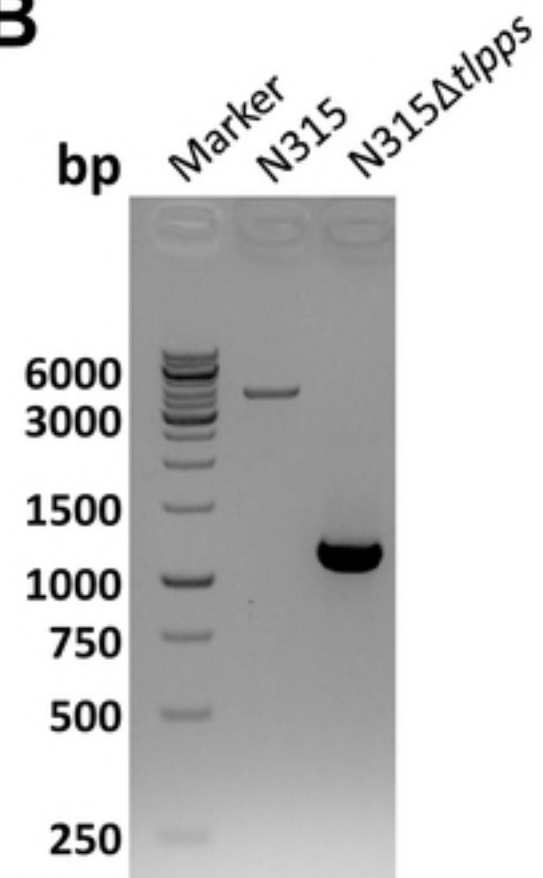**C**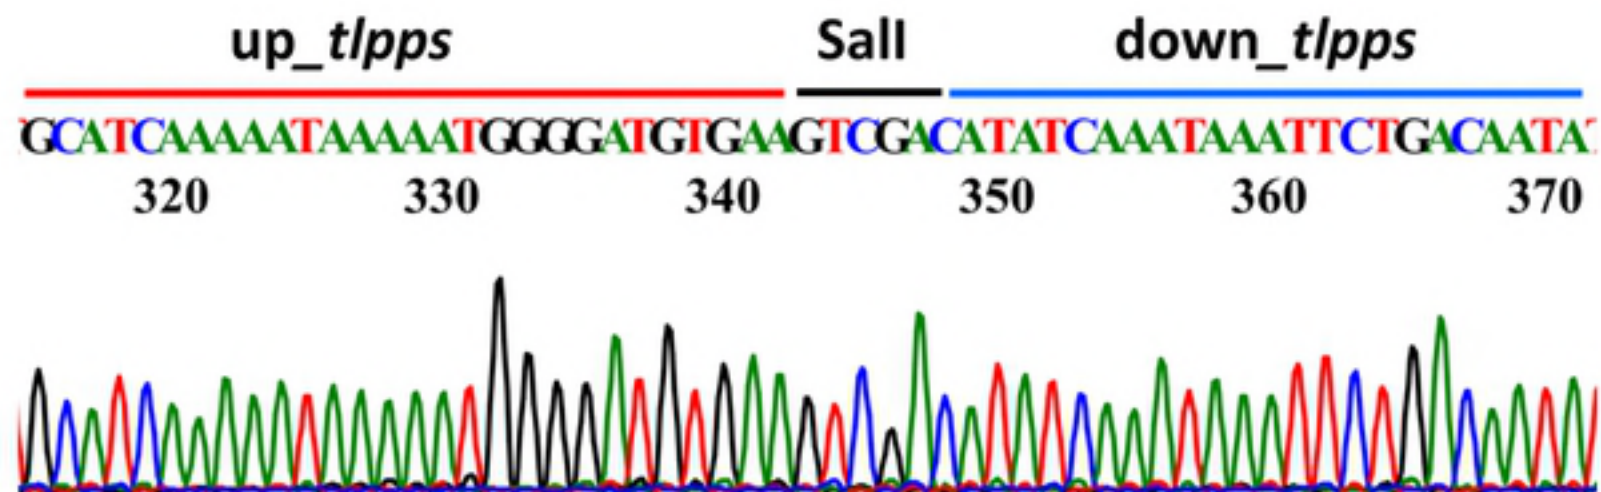



**A**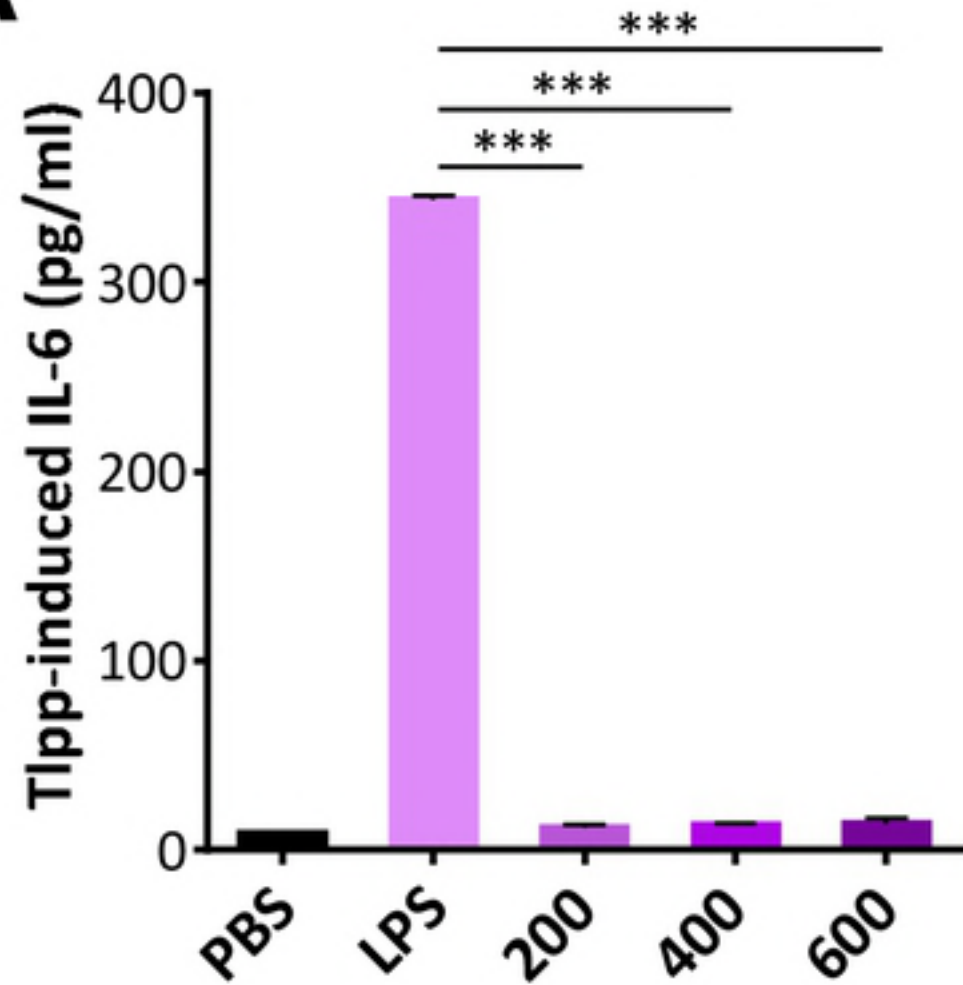**B**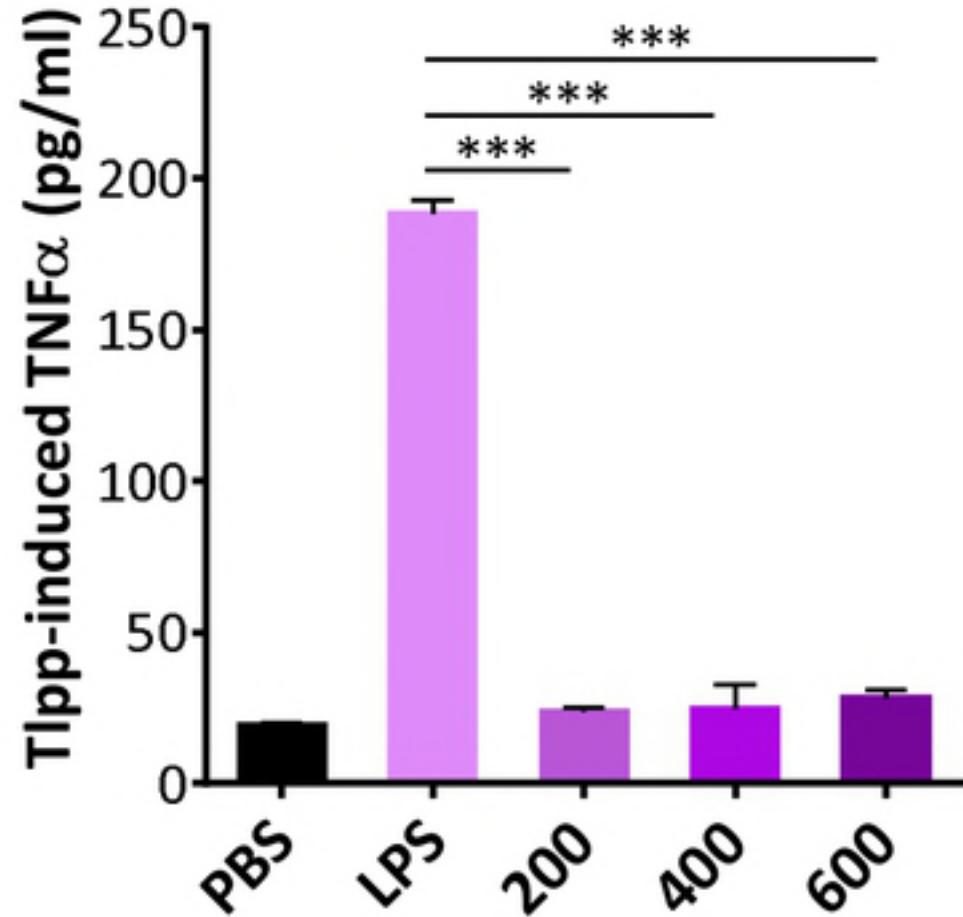

PBS-treated

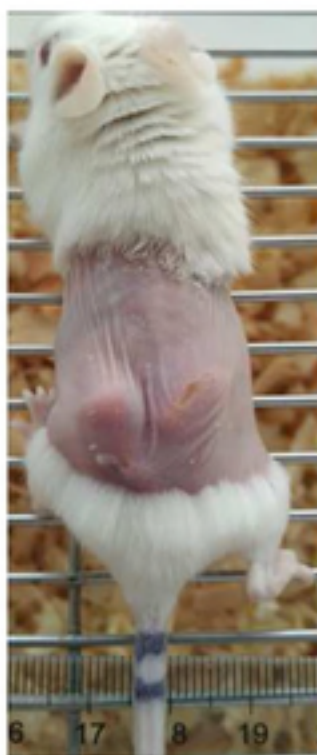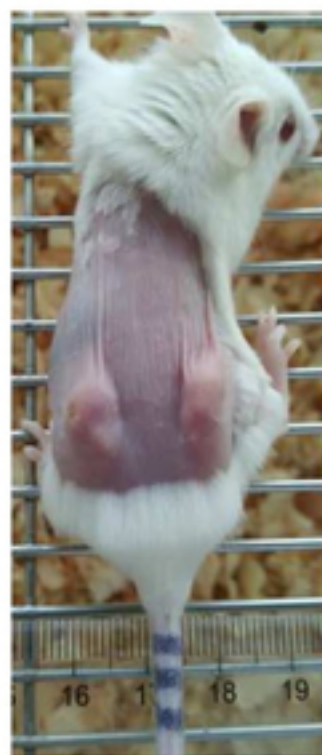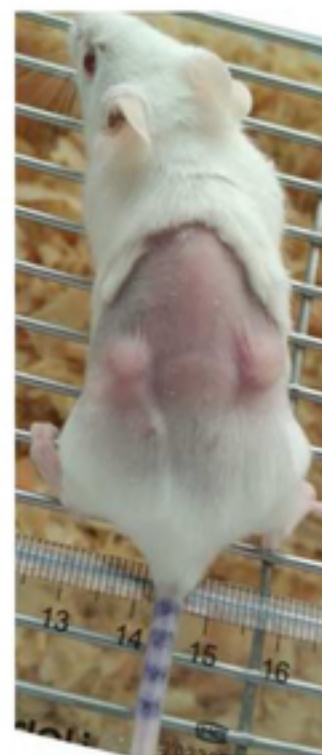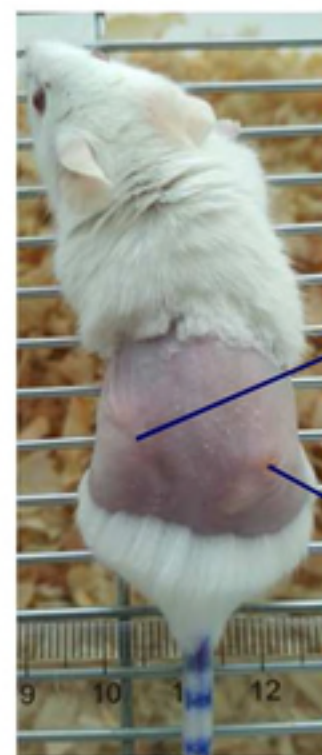

N315 (left)

N315 $\Delta$ *tlpps* (right)

OXA-treated

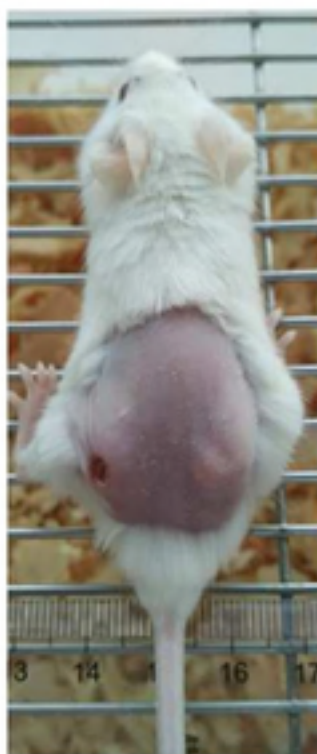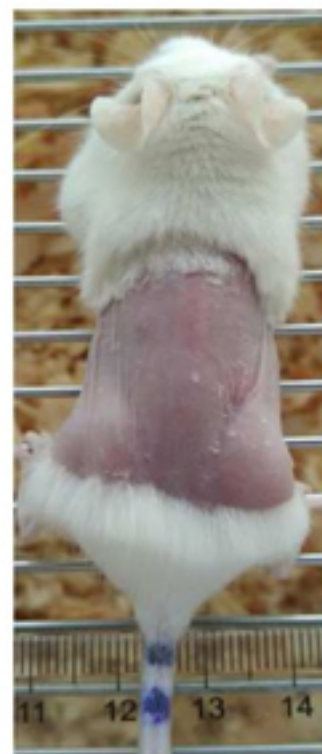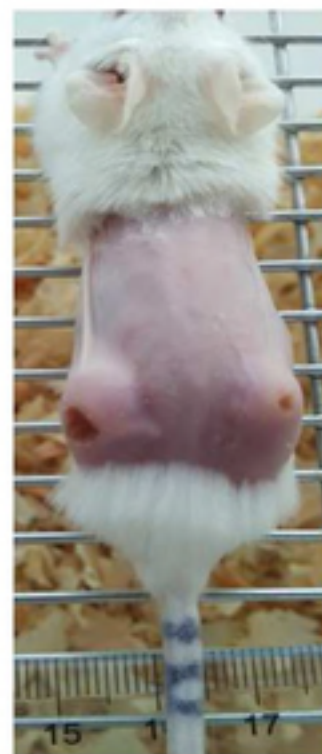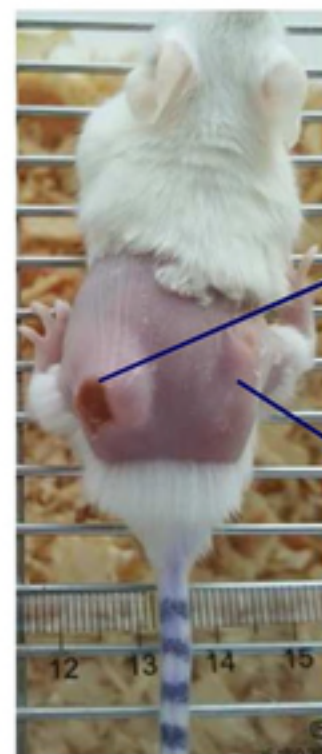

N315 (left)

N315 $\Delta$ *tlpps* (right)

**A**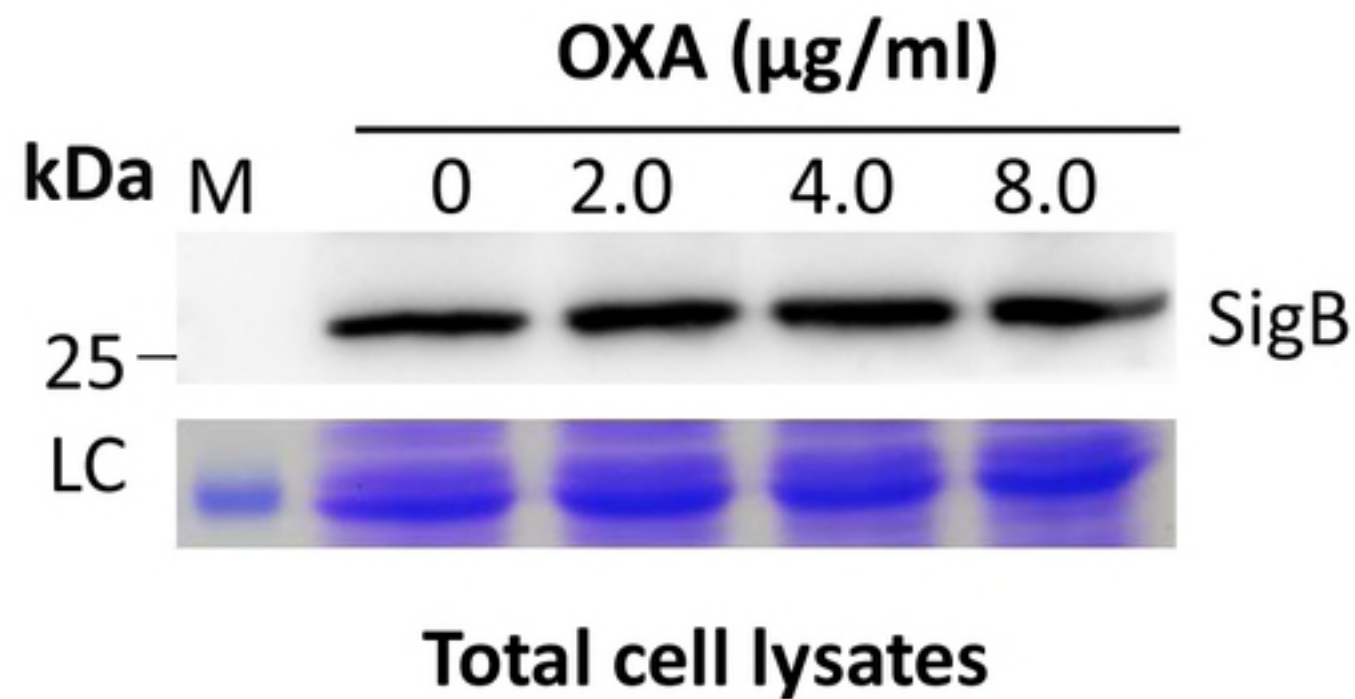**B**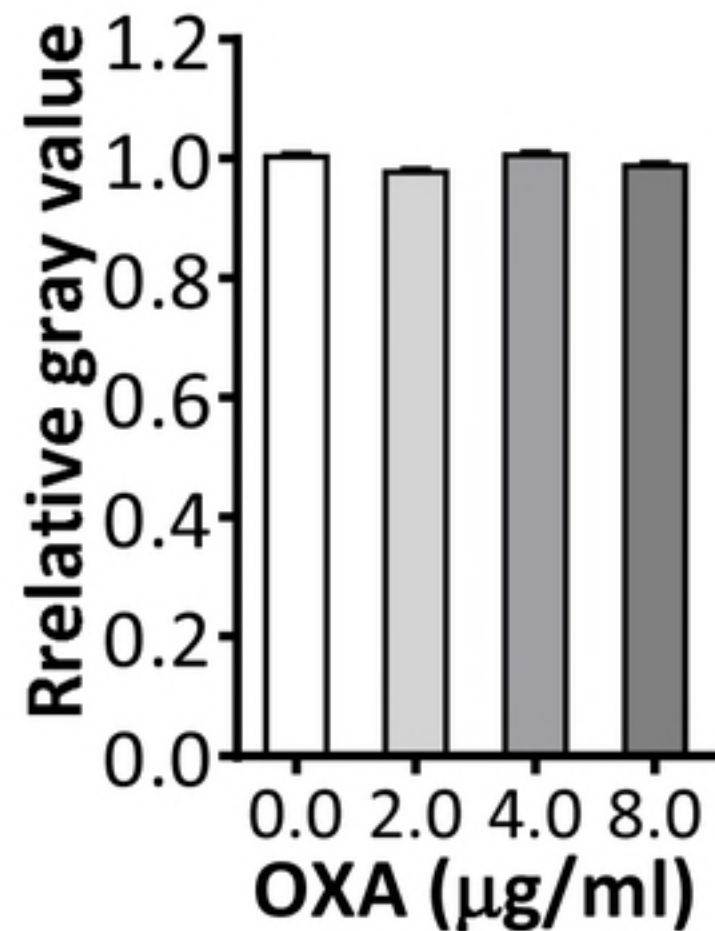

**A**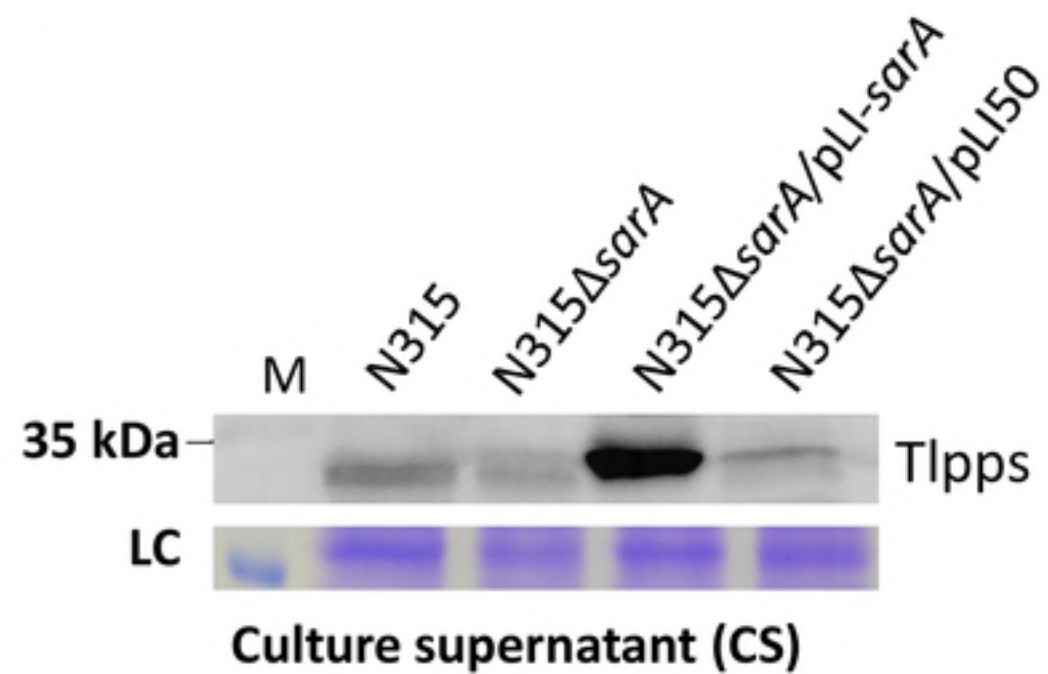**B**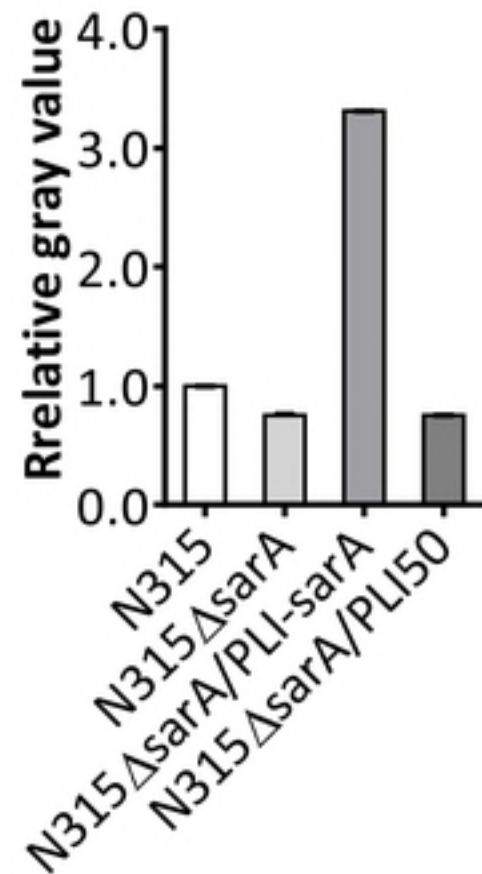**C**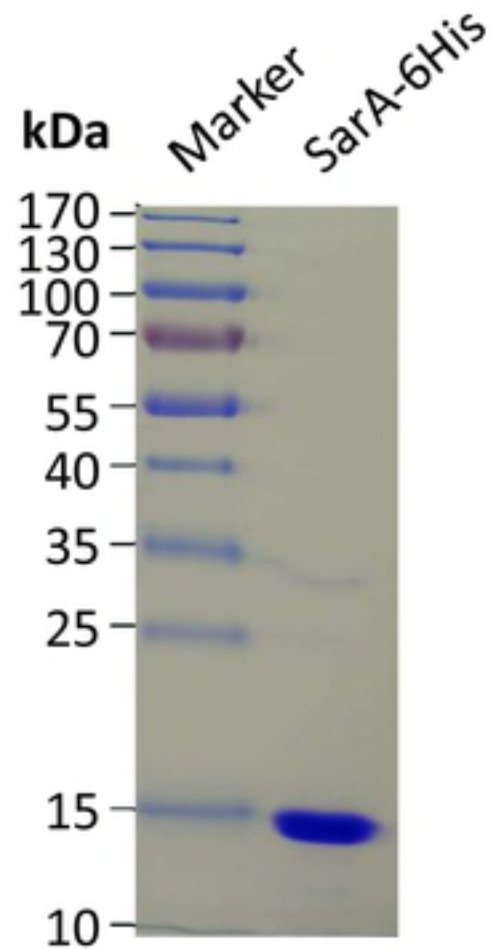



**A**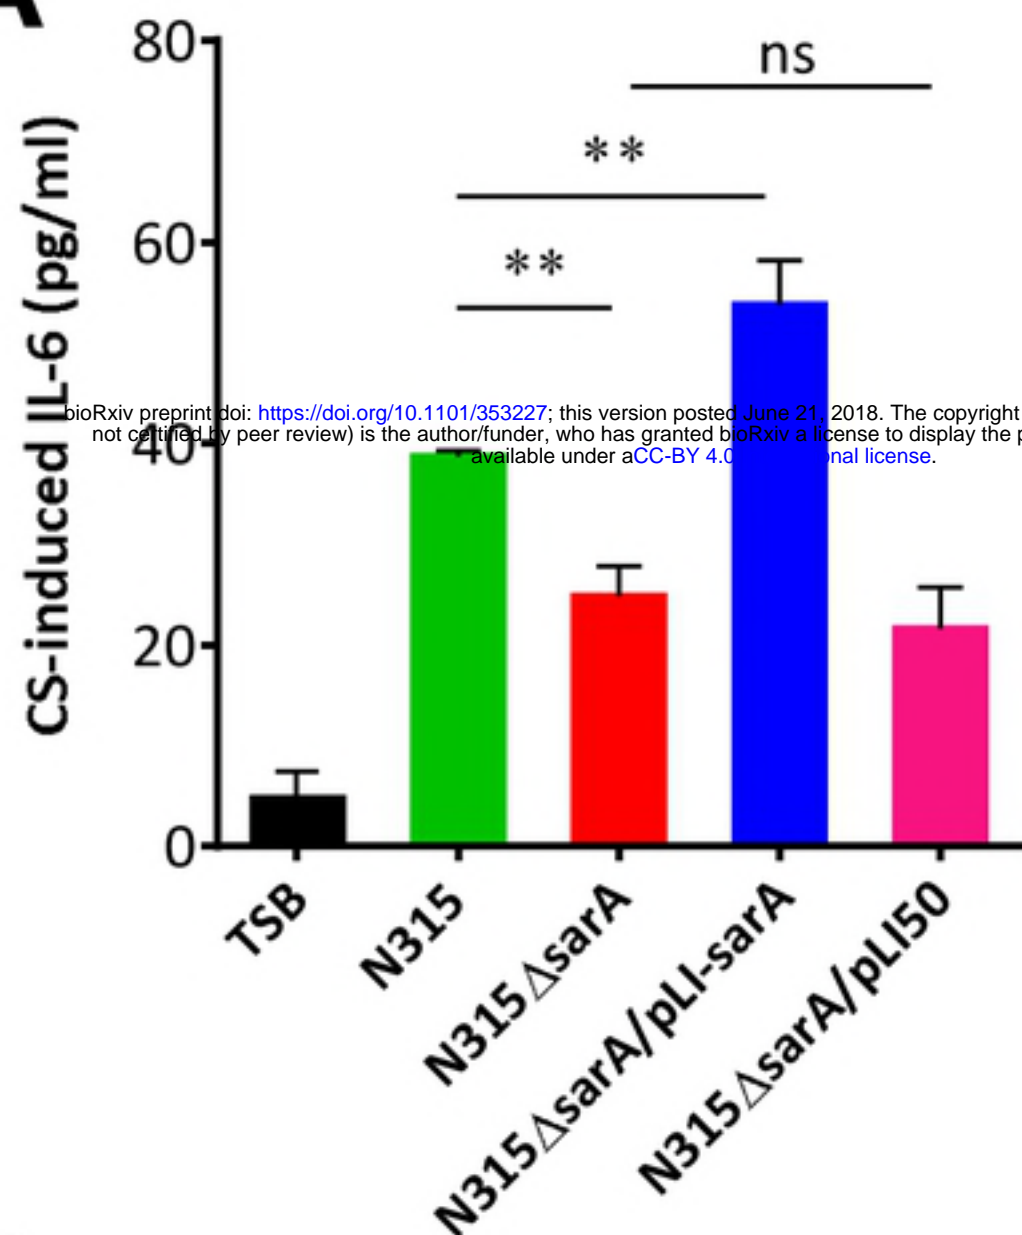**B**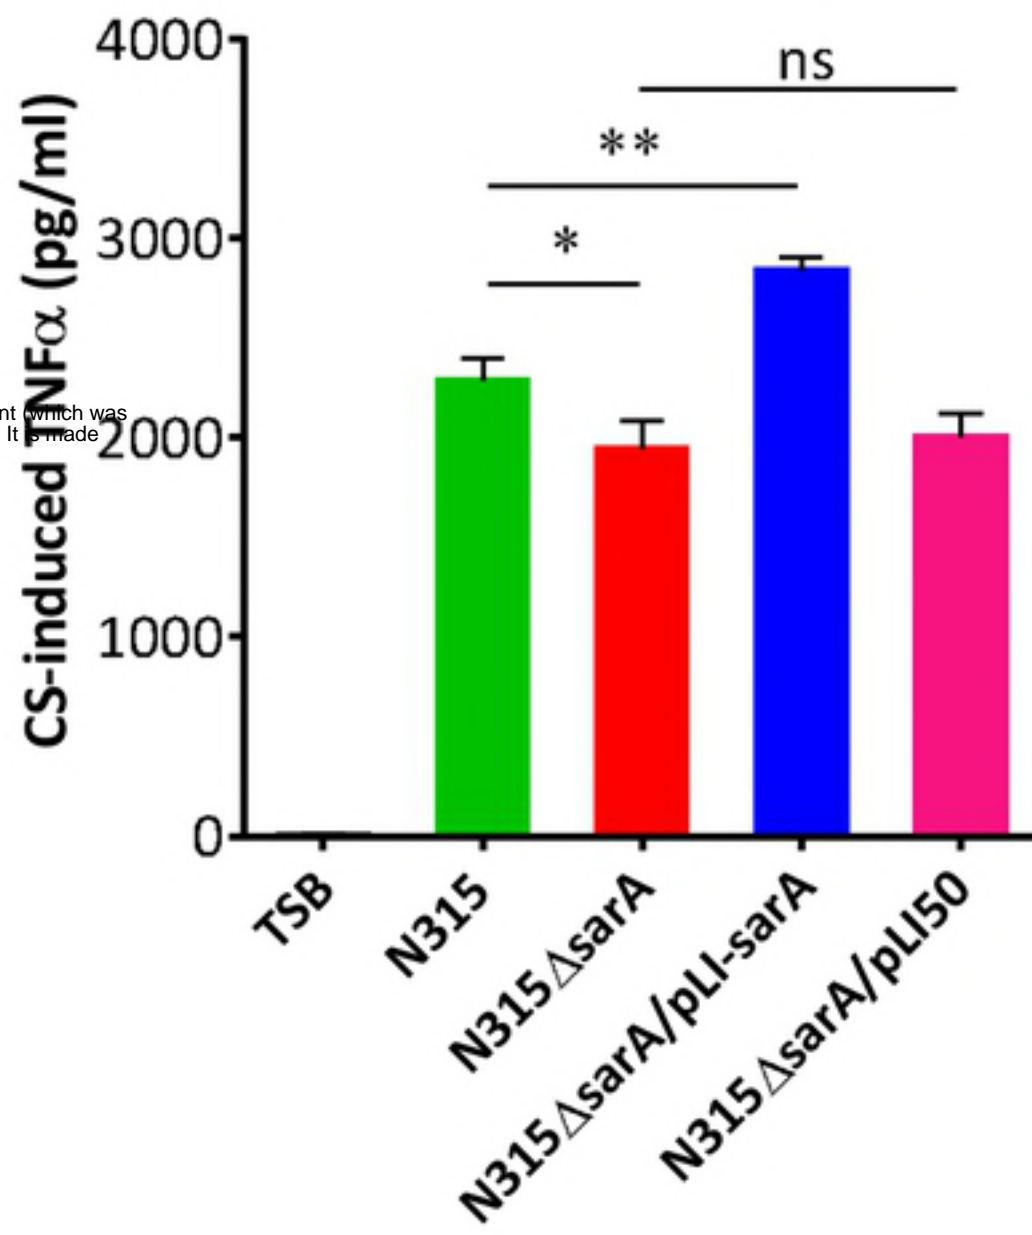**C**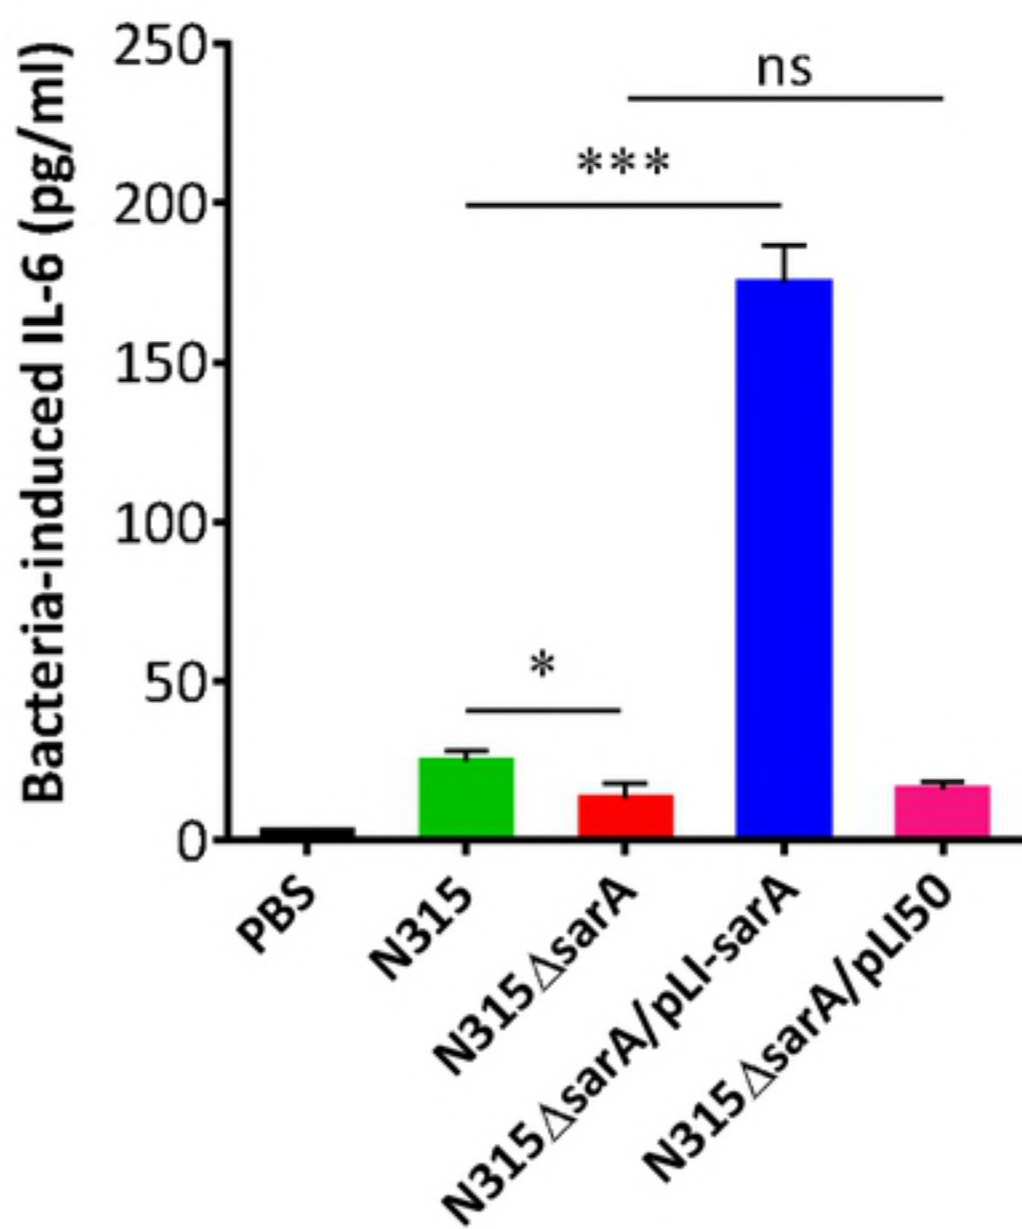**D**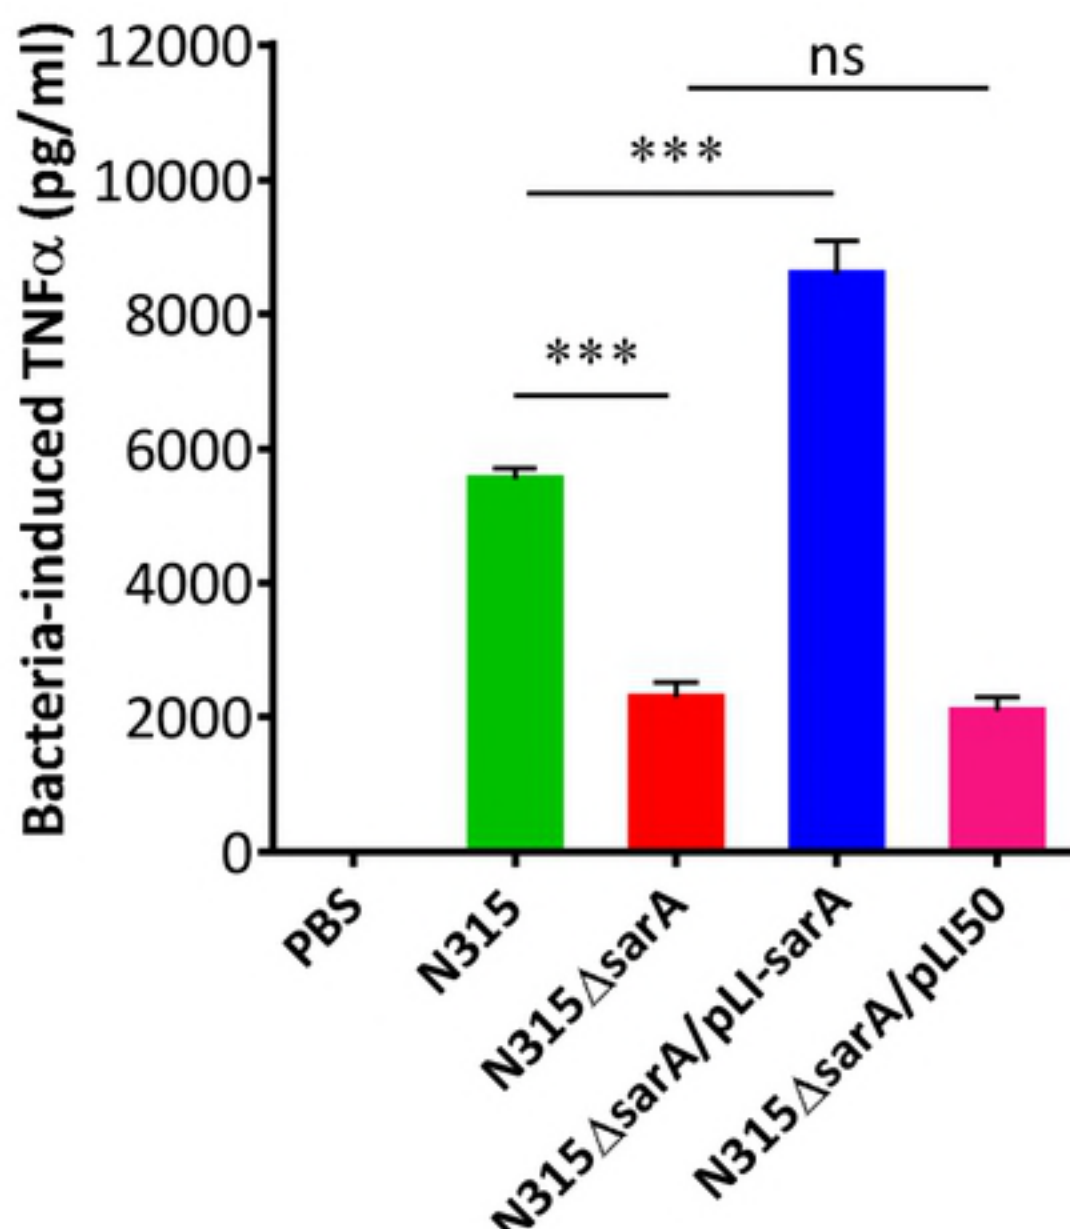

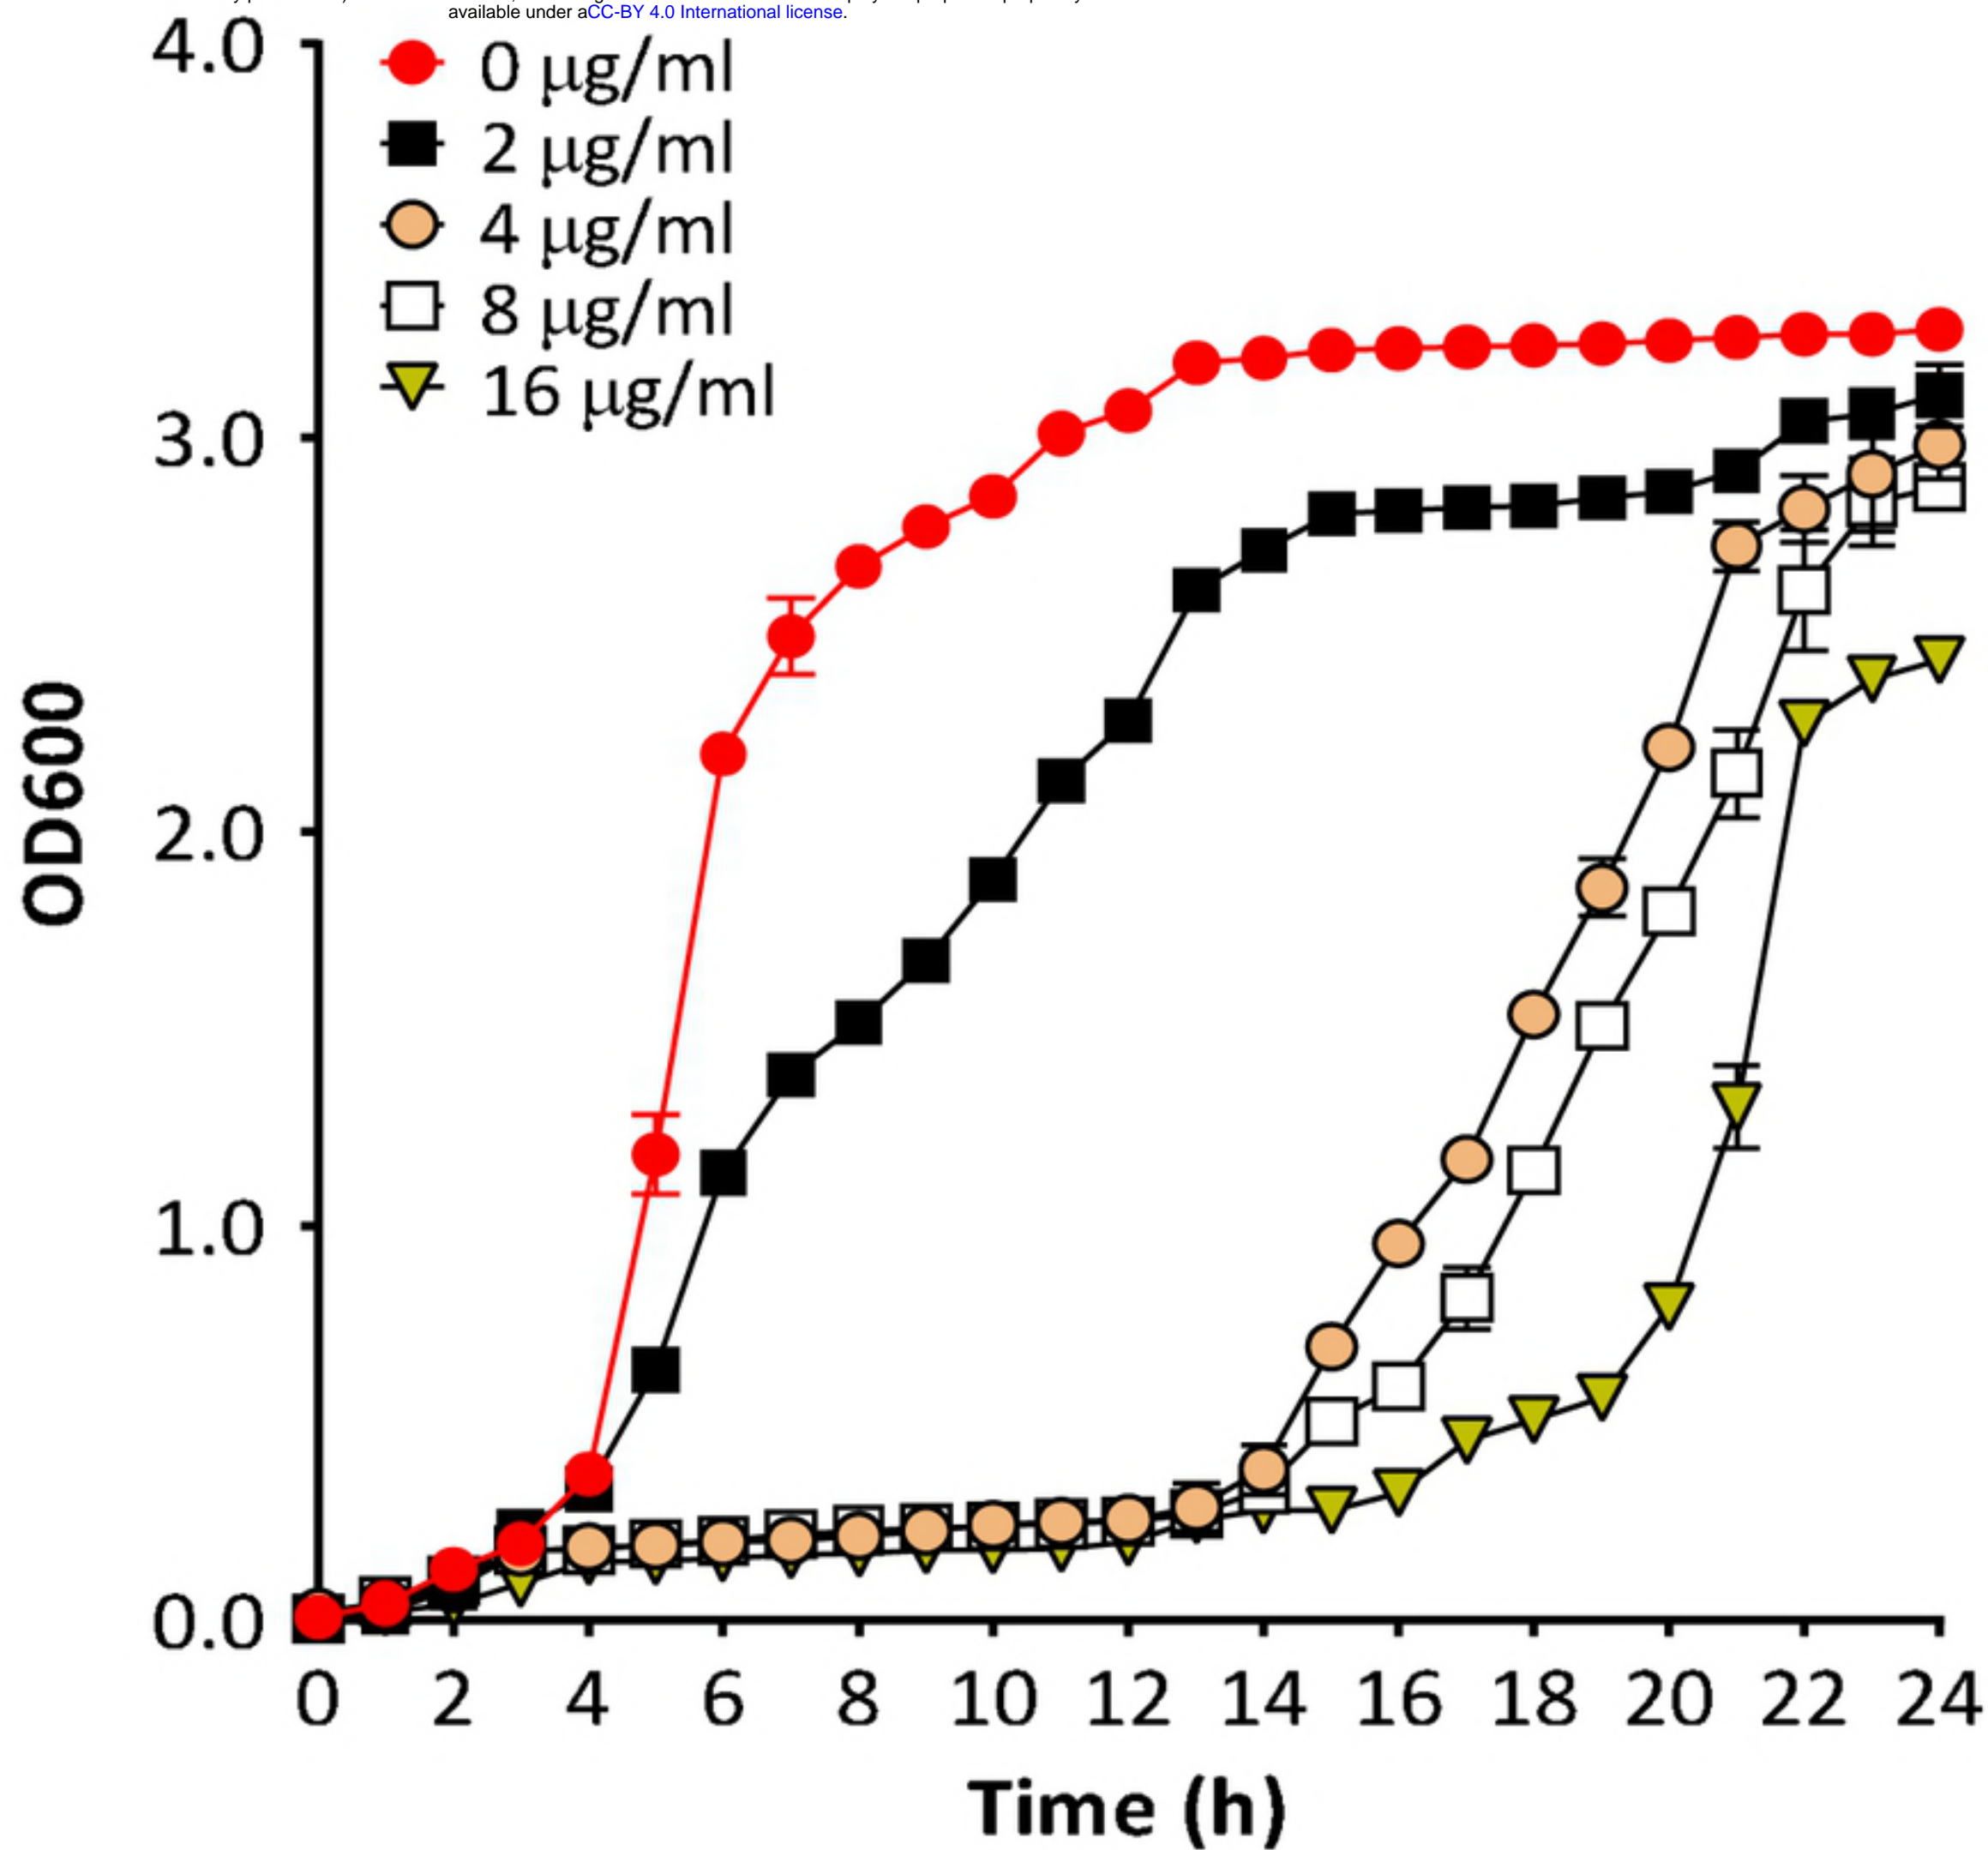

Fig. 1D

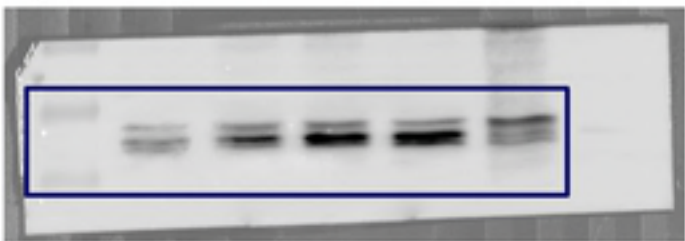

Fig. 2D

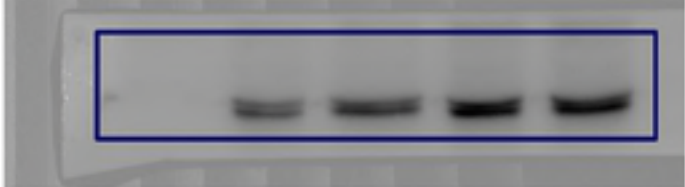

Fig. 2F

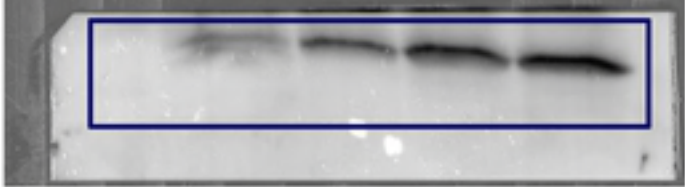

Fig. 3C

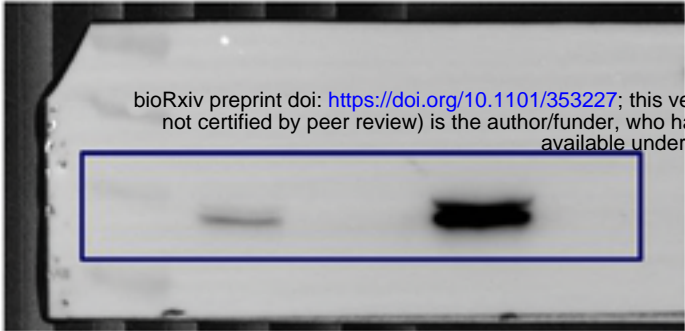

Fig. 6B (Tlpps)

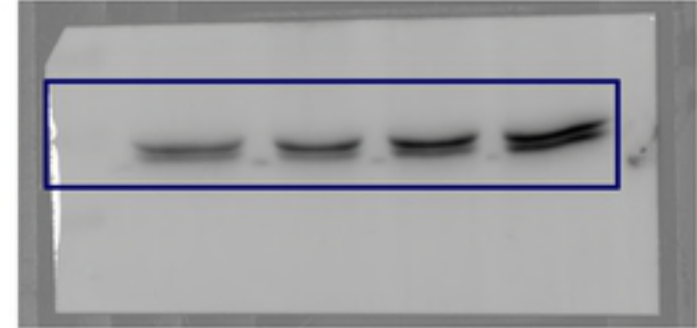

Fig. 6D (Tlpps)

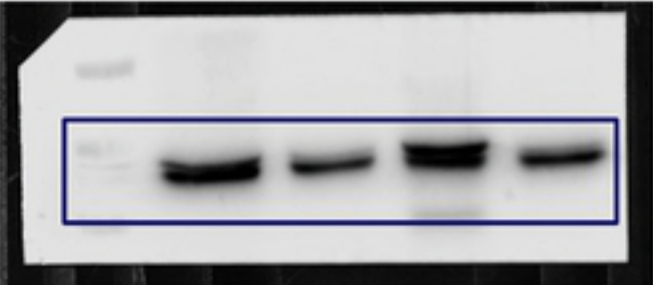

Fig. 7B (Tlpps)

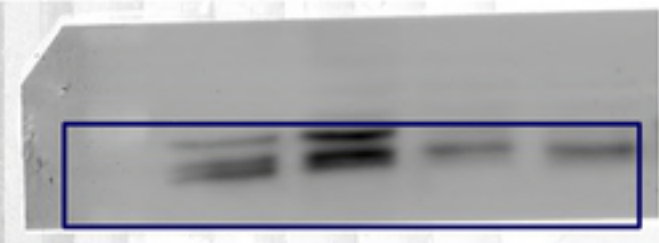

Supplementary Fig. 2A (Tlpps)

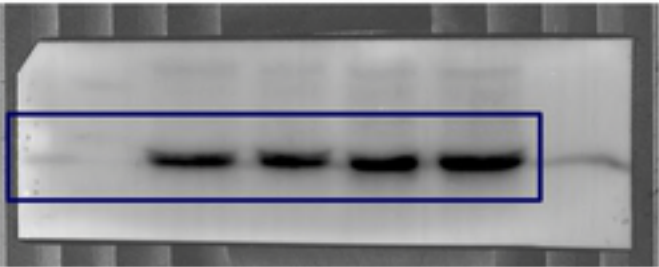

Supplementary Fig. 6A

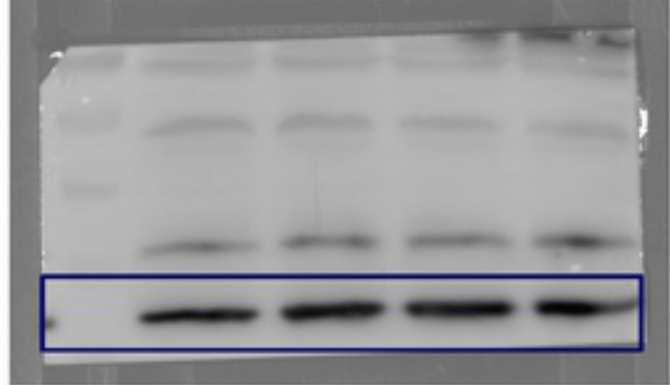

Fig. 2H

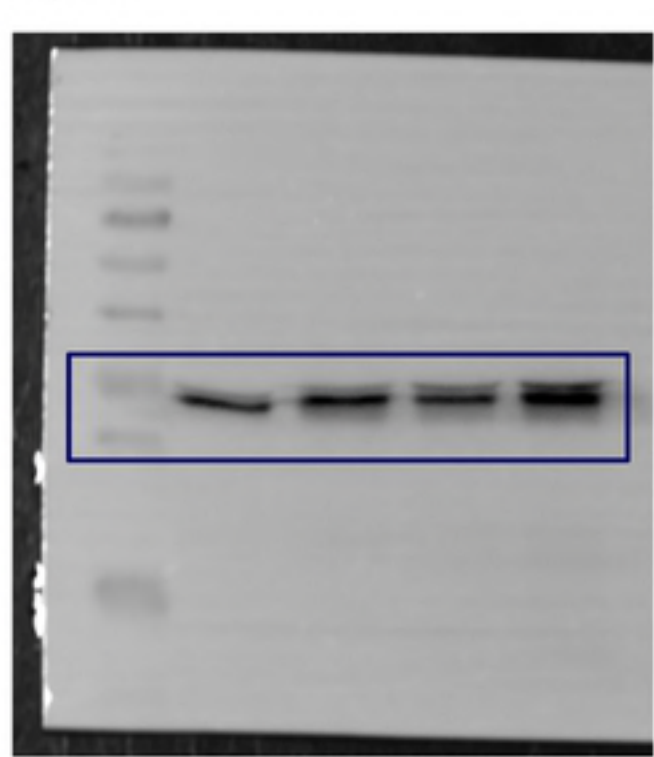

Fig. 3F

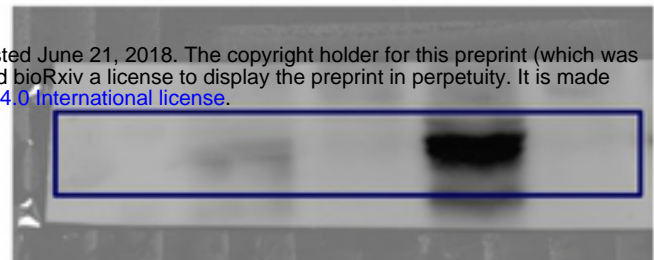

Fig. 6B (SarA)

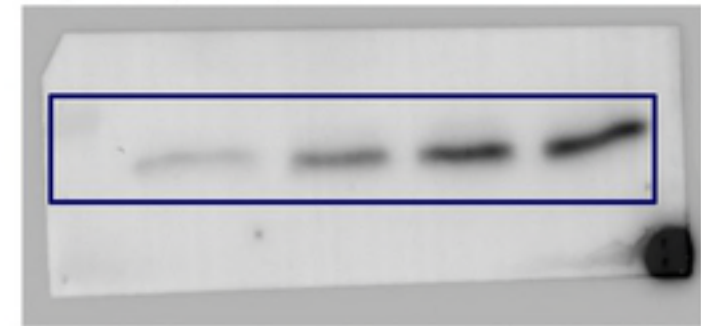

Fig. 6D (SarA)

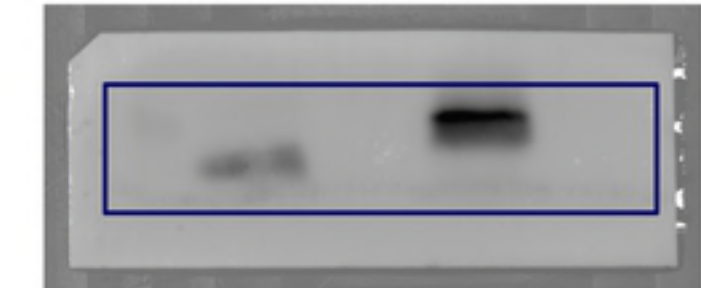

Fig. 7B (SarA)

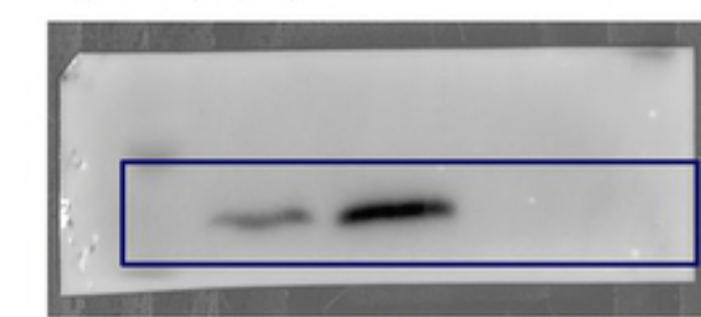

Supplementary Fig. 2A (SarA)

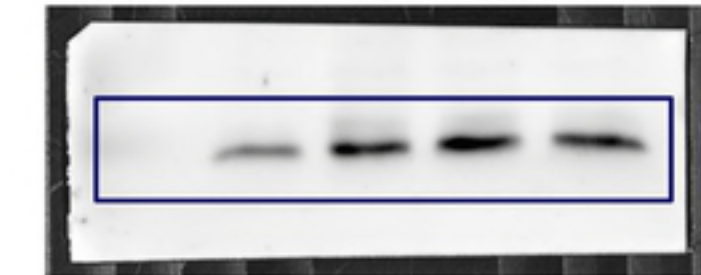

Supplementary Fig. 7A

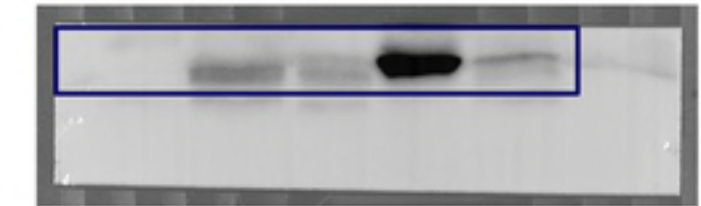

Source: http://biorxiv.org/content/10.1101/353227v1.full.pdf
